# Supplementary material for: Data-driven analysis of biomedical literature suggests broad-spectrum benefits of culinary herbs and spices
Source: PLoS One. 2018 May 29;13(5):e0198030. doi: 10.1371/journal.pone.0198030 (PMC5973616; doi:10.1371/journal.pone.0198030)
Supplement: S7 Dataset — (XLSX) [file pone.0198030.s013.xlsx]

## Sheet: chemical-explained-associations
NCBI Taxonomy ID	Scientific Name	MeSH Tree Number	MeSH Disease Name	MeSH Chemical IDs	MeSH Chemical Names
13329	Achillea millefolium	C10.597.617	Pain	C007210, D005054	Eugenol, 4-cymene
13329	Achillea millefolium	C20.543.480	Hypersensitivity, Immediate	D005054	Eugenol
13329	Achillea millefolium	C23.550.470	Inflammation	C040048, C054132, D005054, D047310	caffeic acid, Eugenol, artemetin, Apigenin
13329	Achillea millefolium	C23.888.277	Edema	C040048, C054132	caffeic acid, artemetin
13329	Achillea millefolium	C23.888.592	Neurologic Manifestations	C007210, C040048, D002726, D012431, D005054	Rutin, Chlorogenic Acid, caffeic acid, Eugenol, 4-cymene
637930	Aframomum melegueta	C18.452.394	Glucose Metabolism Disorders	C024714	caryophyllene
35875	Allium fistulosum	C18.452.394	Glucose Metabolism Disorders	D011794	Quercetin
35875	Allium fistulosum	C18.452.584	Lipid Metabolism Disorders	D011794	Quercetin
35875	Allium fistulosum	C18.654.726	Overnutrition	D011794	Quercetin
35875	Allium fistulosum	C23.888.144	Body Weight	D011794, C013015, C006452	Quercetin, allicin, hesperetin
4682	Allium sativum	C04.557.465	Neoplasms, Germ Cell and Embryonal	C042577	diallyl trisulfide
4682	Allium sativum	C04.557.470	Neoplasms, Glandular and Epithelial	C028009, C042577	diallyl trisulfide, diallyl disulfide
4682	Allium sativum	C04.557.580	Neoplasms, Nerve Tissue	C042577	diallyl trisulfide
4682	Allium sativum	C04.557.665	Nevi and Melanomas	C042577	diallyl trisulfide
4682	Allium sativum	C04.588.180	Breast Neoplasms	C038491, C042577	diallyl trisulfide, allyl sulfide
4682	Allium sativum	C04.588.274	Digestive System Neoplasms	C028009, C038491, C042577, C007836, C002979	diallyl trisulfide, geraniol, selenomethylselenocysteine, allyl sulfide, diallyl disulfide
4682	Allium sativum	C04.588.443	Head and Neck Neoplasms	C042577	diallyl trisulfide
4682	Allium sativum	C04.588.531	Mammary Neoplasms, Animal	C002979, C042577	diallyl trisulfide, selenomethylselenocysteine
4682	Allium sativum	C04.588.805	Skin Neoplasms	C038491	allyl sulfide
4682	Allium sativum	C04.588.945	Urogenital Neoplasms	C028009, C042577	diallyl trisulfide, diallyl disulfide
4682	Allium sativum	C04.697.098	Carcinogenesis	C000596494, C042577	diallyl trisulfide, cyanidin 3-O-glucopyranoside
4682	Allium sativum	C04.697.645	Neoplasm Invasiveness	C028009, C038491, C042577	diallyl trisulfide, allyl sulfide, diallyl disulfide
4682	Allium sativum	C04.697.650	Neoplasm Metastasis	C042577	diallyl trisulfide
4682	Allium sativum	C06.301.371	Gastrointestinal Neoplasms	C002979, C028009, C007836, C042577	diallyl trisulfide, geraniol, diallyl disulfide, selenomethylselenocysteine
4682	Allium sativum	C06.301.623	Liver Neoplasms	C038491	allyl sulfide
4682	Allium sativum	C06.405.117	Esophageal Diseases	C042577	diallyl trisulfide
4682	Allium sativum	C06.405.205	Gastroenteritis	C006452	allicin
4682	Allium sativum	C06.405.249	Gastrointestinal Neoplasms	C042577, C028009, C007836, C002979	diallyl trisulfide, geraniol, diallyl disulfide, selenomethylselenocysteine
4682	Allium sativum	C06.405.469	Intestinal Diseases	C028009, C007836, C002979, C006452	allicin, geraniol, diallyl disulfide, selenomethylselenocysteine
4682	Allium sativum	C06.552.195	Chemical and Drug Induced Liver Injury	C054528, C028009, C038491, C042577	diallyl trisulfide, allyl methyl disulfide, diallyl disulfide, allyl sulfide
4682	Allium sativum	C06.552.241	Fatty Liver	C038491	allyl sulfide
4682	Allium sativum	C06.552.380	Hepatitis	C038491	allyl sulfide
4682	Allium sativum	C06.552.645	Liver Diseases, Alcoholic	C038491	allyl sulfide
4682	Allium sativum	C06.552.697	Liver Neoplasms	C038491	allyl sulfide
4682	Allium sativum	C10.228.140	Brain Diseases	C007836	geraniol
4682	Allium sativum	C10.597.350	Dyskinesias	C007836	geraniol
4682	Allium sativum	C10.597.606	Neurobehavioral Manifestations	C007836	geraniol
4682	Allium sativum	C12.294.260	Genital Neoplasms, Male	C028009, C042577	diallyl trisulfide, diallyl disulfide
4682	Allium sativum	C12.294.565	Prostatic Diseases	C028009, C042577	diallyl trisulfide, diallyl disulfide
4682	Allium sativum	C12.758.409	Genital Neoplasms, Male	C028009, C042577	diallyl trisulfide, diallyl disulfide
4682	Allium sativum	C12.777.419	Kidney Diseases	C028009, C038491	allyl sulfide, diallyl disulfide
4682	Allium sativum	C13.351.968	Urologic Diseases	C028009, C038491	allyl sulfide, diallyl disulfide
4682	Allium sativum	C14.280.067	Arrhythmias, Cardiac	C042577	diallyl trisulfide
4682	Allium sativum	C14.280.647	Myocardial Ischemia	C006453	alliin
4682	Allium sativum	C14.907.585	Myocardial Ischemia	C006453	alliin
4682	Allium sativum	C17.800.090	Breast Diseases	C038491, C042577	diallyl trisulfide, allyl sulfide
4682	Allium sativum	C17.800.882	Skin Neoplasms	C038491	allyl sulfide
4682	Allium sativum	C18.452.394	Glucose Metabolism Disorders	C002979	selenomethylselenocysteine
4682	Allium sativum	C23.550.073	Arrhythmias, Cardiac	C042577	diallyl trisulfide
4682	Allium sativum	C23.550.414	Hemorrhage	C006452	allicin
4682	Allium sativum	C23.550.717	Necrosis	C028009	diallyl disulfide
4682	Allium sativum	C23.550.727	Neoplastic Processes	C000596494, C028009, C038491, C042577	diallyl trisulfide, cyanidin 3-O-glucopyranoside, allyl sulfide, diallyl disulfide
4682	Allium sativum	C23.550.891	Ulcer	C006452	allicin
4682	Allium sativum	C23.888.144	Body Weight	C006452	allicin
4682	Allium sativum	C23.888.277	Edema	C006452	allicin
4682	Allium sativum	C23.888.592	Neurologic Manifestations	C007836, C042577	diallyl trisulfide, geraniol
4682	Allium sativum	C25.100.562	Chemical and Drug Induced Liver Injury	C054528, C028009, C038491, C042577	diallyl trisulfide, allyl sulfide, allyl methyl disulfide, diallyl disulfide
4682	Allium sativum	C25.723.260	Chemical and Drug Induced Liver Injury	C054528, C028009, C038491, C042577	diallyl trisulfide, allyl methyl disulfide, diallyl disulfide, allyl sulfide
4682	Allium sativum	C25.775.100	Alcohol-Related Disorders	C038491	allyl sulfide
74900	Allium schoenoprasum	C04.588.274	Digestive System Neoplasms	D011794, C013015, D047310	Quercetin, hesperetin, Apigenin
74900	Allium schoenoprasum	C04.588.945	Urogenital Neoplasms	D011794, D047310	Quercetin, Apigenin
74900	Allium schoenoprasum	C06.301.371	Gastrointestinal Neoplasms	D011794, C013015, D047310	Quercetin, hesperetin, Apigenin
74900	Allium schoenoprasum	C06.405.249	Gastrointestinal Neoplasms	D011794, C013015, D047310	Quercetin, hesperetin, Apigenin
74900	Allium schoenoprasum	C06.405.469	Intestinal Diseases	D011794, C013015, D047310	Quercetin, hesperetin, Apigenin
74900	Allium schoenoprasum	C12.294.260	Genital Neoplasms, Male	D011794, D047310	Quercetin, Apigenin
74900	Allium schoenoprasum	C12.294.565	Prostatic Diseases	D011794, D047310	Quercetin, Apigenin
74900	Allium schoenoprasum	C12.758.409	Genital Neoplasms, Male	D011794, D047310	Quercetin, Apigenin
4683	Allium tuberosum	C04.557.337	Leukemia	D011794	Quercetin
4683	Allium tuberosum	C08.127.108	Asthma	D000241	Adenosine
4683	Allium tuberosum	C08.381.495	Lung Diseases, Obstructive	D011794, D000241	Quercetin, Adenosine
4683	Allium tuberosum	C08.674.095	Asthma	D000241	Adenosine
4683	Allium tuberosum	C10.597.617	Pain	D011794, D000241	Quercetin, Adenosine
4683	Allium tuberosum	C20.543.480	Hypersensitivity, Immediate	D011794, D000241	Quercetin, Adenosine
4683	Allium tuberosum	C23.550.470	Inflammation	D011794, C064309	Quercetin, kaempferol 3-O-sophoroside
4683	Allium tuberosum	C23.888.592	Neurologic Manifestations	D011794, D000241, D008353	Mannitol, Quercetin, Adenosine
4683	Allium tuberosum	C23.888.821	Signs and Symptoms, Digestive	D011794	Quercetin
94327	Alpinia galanga	C04.557.465	Neoplasms, Germ Cell and Embryonal	D005054	Eugenol
94327	Alpinia galanga	C04.557.580	Neoplasms, Nerve Tissue	D005054	Eugenol
94327	Alpinia galanga	C04.557.665	Nevi and Melanomas	D005054	Eugenol
94327	Alpinia galanga	C04.588.180	Breast Neoplasms	C057996, D005054	1'-acetoxyeugenol, Eugenol
94327	Alpinia galanga	C04.588.805	Skin Neoplasms	D005054	Eugenol
94327	Alpinia galanga	C04.588.945	Urogenital Neoplasms	D005054	Eugenol
94327	Alpinia galanga	C06.405.469	Intestinal Diseases	D005054	Eugenol
94327	Alpinia galanga	C17.800.090	Breast Diseases	C057996, D005054	1'-acetoxyeugenol, Eugenol
94327	Alpinia galanga	C17.800.882	Skin Neoplasms	D005054	Eugenol
94327	Alpinia galanga	C18.452.394	Glucose Metabolism Disorders	C037032	galangin
94327	Alpinia galanga	C23.550.470	Inflammation	D005054, C037032	galangin, Eugenol
199623	Alpinia officinarum	C01.252.410	Gram-Positive Bacterial Infections	D005054	Eugenol
199623	Alpinia officinarum	C04.557.465	Neoplasms, Germ Cell and Embryonal	D005054	Eugenol
199623	Alpinia officinarum	C04.557.470	Neoplasms, Glandular and Epithelial	C037032	galangin
199623	Alpinia officinarum	C04.557.580	Neoplasms, Nerve Tissue	D005054	Eugenol
199623	Alpinia officinarum	C04.557.665	Nevi and Melanomas	D005054	Eugenol
199623	Alpinia officinarum	C04.588.180	Breast Neoplasms	D005054	Eugenol
199623	Alpinia officinarum	C04.588.274	Digestive System Neoplasms	D005054	Eugenol
199623	Alpinia officinarum	C10.597.617	Pain	C012526, D005054	quercitrin, Eugenol
199623	Alpinia officinarum	C17.800.090	Breast Diseases	D005054	Eugenol
199623	Alpinia officinarum	C23.888.592	Neurologic Manifestations	C012526, D005054, C037032	quercitrin, galangin, Eugenol
40922	Anethum graveolens	C06.405.469	Intestinal Diseases	C013015, D047310, C008281, D005707, D011794, D013936	Thymidine, limonene, Apigenin, Gallic Acid, Quercetin, hesperetin
40922	Anethum graveolens	C10.228.140	Brain Diseases	C040048, D014529, C005273, D011794, D013936	Thymidine, Uridine, Quercetin, caffeic acid, naringenin
40922	Anethum graveolens	C14.907.137	Arterial Occlusive Diseases	D011794, C040048, C005273, C006552	Quercetin, caffeic acid, naringenin, kaempferol
40922	Anethum graveolens	C18.452.394	Glucose Metabolism Disorders	D011794, C005273, C006552, D005707	kaempferol, Quercetin, naringenin, Gallic Acid
40922	Anethum graveolens	C18.452.584	Lipid Metabolism Disorders	D011794, C005273, D005707	Quercetin, naringenin, Gallic Acid
40922	Anethum graveolens	C23.888.592	Neurologic Manifestations	C013015, C040048, C005273, C008281, D011794, D013936	Thymidine, limonene, Quercetin, caffeic acid, naringenin, hesperetin
40922	Anethum graveolens	C23.888.821	Signs and Symptoms, Digestive	D011794	Quercetin
4045	Apium graveolens	C04.588.274	Digestive System Neoplasms	D011794, C013015, D047310	Quercetin, hesperetin, Apigenin
4045	Apium graveolens	C04.697.098	Carcinogenesis	D011794, D047311, C040015, C006552	Luteolin, Quercetin, myricetin, kaempferol
4045	Apium graveolens	C05.550.114	Arthritis	D047311, D047310	Luteolin, Apigenin
4045	Apium graveolens	C06.301.371	Gastrointestinal Neoplasms	D011794, C013015, D047310	Quercetin, hesperetin, Apigenin
4045	Apium graveolens	C06.405.249	Gastrointestinal Neoplasms	D011794, C013015, D047310	Quercetin, hesperetin, Apigenin
4045	Apium graveolens	C06.405.469	Intestinal Diseases	D011794, C013015, D047310	Quercetin, hesperetin, Apigenin
4045	Apium graveolens	C06.405.748	Stomach Diseases	D011794	Quercetin
4045	Apium graveolens	C10.228.140	Brain Diseases	D011794, C005273	Quercetin, naringenin
4045	Apium graveolens	C10.228.662	Movement Disorders	D011794	Quercetin
4045	Apium graveolens	C12.777.419	Kidney Diseases	C005246, D047311, C040015, C005273, D011794, D008730	Methoxsalen, Luteolin, naringenin, Quercetin, myricetin, myristicin
4045	Apium graveolens	C12.777.934	Urination Disorders	D011794	Quercetin
4045	Apium graveolens	C13.351.968	Urologic Diseases	C005246, D047311, C040015, C005273, D011794, D008730	Methoxsalen, Luteolin, naringenin, Quercetin, myricetin, myristicin
4045	Apium graveolens	C14.907.137	Arterial Occlusive Diseases	D011794, C005273, C006552	Quercetin, naringenin, kaempferol
4045	Apium graveolens	C14.907.253	Cerebrovascular Disorders	D011794	Quercetin
4045	Apium graveolens	C14.907.489	Hypertension	D011794	Quercetin
4045	Apium graveolens	C18.452.394	Glucose Metabolism Disorders	D011794, C005273, C006552	Quercetin, naringenin, kaempferol
4045	Apium graveolens	C18.452.584	Lipid Metabolism Disorders	D011794, C005273	Quercetin, naringenin
4045	Apium graveolens	C23.550.355	Fibrosis	D011794	Quercetin
4045	Apium graveolens	C23.550.470	Inflammation	D011794, C047368, D047311, D047310	Luteolin, Quercetin, 3-methylquercetin, Apigenin
4045	Apium graveolens	C23.550.513	Ischemia	D011794	Quercetin
4045	Apium graveolens	C23.550.717	Necrosis	C013015, C005246, C040015, C005273, D011794	hesperetin, naringenin, Quercetin, myricetin, myristicin
4045	Apium graveolens	C23.550.727	Neoplastic Processes	D047311, D047310, C040015, C005273, C006552, D011794	Apigenin, Luteolin, kaempferol, naringenin, Quercetin, myricetin
4045	Apium graveolens	C23.888.277	Edema	D011794	Quercetin
3704	Armoracia rusticana	C04.557.337	Leukemia	D011794	Quercetin
3704	Armoracia rusticana	C10.228.140	Brain Diseases	D011794	Quercetin
72332	Artemisia absinthium	C06.552.195	Chemical and Drug Induced Liver Injury	C054132	artemetin
72332	Artemisia absinthium	C23.550.470	Inflammation	C054132	artemetin
72332	Artemisia absinthium	C25.100.562	Chemical and Drug Induced Liver Injury	C054132	artemetin
72332	Artemisia absinthium	C25.723.260	Chemical and Drug Induced Liver Injury	C054132	artemetin
72341	Artemisia dracunculus	C04.557.465	Neoplasms, Germ Cell and Embryonal	D011794, D047310	Quercetin, Apigenin
72341	Artemisia dracunculus	C04.557.580	Neoplasms, Nerve Tissue	D011794, D047310	Quercetin, Apigenin
72341	Artemisia dracunculus	C04.557.665	Nevi and Melanomas	D047310	Apigenin
72341	Artemisia dracunculus	C04.588.274	Digestive System Neoplasms	D011794, C013015, D047310	Quercetin, hesperetin, Apigenin
72341	Artemisia dracunculus	C04.588.443	Head and Neck Neoplasms	D011794	Quercetin
72341	Artemisia dracunculus	C06.301.371	Gastrointestinal Neoplasms	D011794, C013015, D047310	Quercetin, hesperetin, Apigenin
72341	Artemisia dracunculus	C06.405.117	Esophageal Diseases	D011794	Quercetin
72341	Artemisia dracunculus	C06.405.249	Gastrointestinal Neoplasms	D011794, C013015, D047310	Quercetin, hesperetin, Apigenin
72341	Artemisia dracunculus	C10.668.829	Peripheral Nervous System Diseases	C013015	hesperetin
72341	Artemisia dracunculus	C18.452.394	Glucose Metabolism Disorders	D011794, C006552	Quercetin, kaempferol
72341	Artemisia dracunculus	C23.888.592	Neurologic Manifestations	D011794, C013015	Quercetin, hesperetin
4220	Artemisia vulgaris	C06.552.195	Chemical and Drug Induced Liver Injury	C025473	gamma-sitosterol
4220	Artemisia vulgaris	C23.550.470	Inflammation	C036380	amyrin
4220	Artemisia vulgaris	C23.888.592	Neurologic Manifestations	C036380	amyrin
4220	Artemisia vulgaris	C25.100.562	Chemical and Drug Induced Liver Injury	C025473	gamma-sitosterol
4220	Artemisia vulgaris	C25.723.260	Chemical and Drug Induced Liver Injury	C025473	gamma-sitosterol
258209	Berberis vulgaris	C06.552.195	Chemical and Drug Induced Liver Injury	D001599	Berberine
258209	Berberis vulgaris	C08.381.765	Pulmonary Fibrosis	D001599	Berberine
258209	Berberis vulgaris	C10.597.606	Neurobehavioral Manifestations	D001599	Berberine
258209	Berberis vulgaris	C13.351.968	Urologic Diseases	D001599	Berberine
258209	Berberis vulgaris	C14.907.489	Hypertension	D001599	Berberine
258209	Berberis vulgaris	C18.452.394	Glucose Metabolism Disorders	D001599	Berberine
258209	Berberis vulgaris	C23.550.513	Ischemia	C009438	tetrandrine
258209	Berberis vulgaris	C23.550.737	Nerve Degeneration	D001599	Berberine
258209	Berberis vulgaris	C23.888.592	Neurologic Manifestations	D001599	Berberine
258209	Berberis vulgaris	C25.100.562	Chemical and Drug Induced Liver Injury	D001599	Berberine
258209	Berberis vulgaris	C25.723.260	Chemical and Drug Induced Liver Injury	D001599	Berberine
258209	Berberis vulgaris	F03.615.200	Amnesia	D001599	Berberine
66672	Bixa orellana	C23.550.470	Inflammation	C082097	tocotrienol, delta
65558	Capparis spinosa	C04.588.274	Digestive System Neoplasms	D011794	Quercetin
65558	Capparis spinosa	C06.301.371	Gastrointestinal Neoplasms	D011794	Quercetin
65558	Capparis spinosa	C06.405.249	Gastrointestinal Neoplasms	D011794	Quercetin
65558	Capparis spinosa	C06.405.469	Intestinal Diseases	D012431, D011794	Quercetin, Rutin
65558	Capparis spinosa	C06.552.195	Chemical and Drug Induced Liver Injury	D011794, C073734, D012431	sinapinic acid, Quercetin, Rutin
65558	Capparis spinosa	C10.228.140	Brain Diseases	D011794, C073734, C004999	sinapinic acid, Quercetin, ferulic acid
65558	Capparis spinosa	C10.597.350	Dyskinesias	D012431, D011794, C058895	1-(2-methoxyphenyl)-4-(4-(2-phthalimido)butyl)piperazine, Quercetin, Rutin
65558	Capparis spinosa	C10.597.606	Neurobehavioral Manifestations	C073734, D011794, C058895	sinapinic acid, 1-(2-methoxyphenyl)-4-(4-(2-phthalimido)butyl)piperazine, Quercetin
65558	Capparis spinosa	C10.597.617	Pain	D011794	Quercetin
65558	Capparis spinosa	C12.777.419	Kidney Diseases	D012431, D011794	Quercetin, Rutin
65558	Capparis spinosa	C13.351.968	Urologic Diseases	D011794, D012431	Quercetin, Rutin
65558	Capparis spinosa	C18.452.394	Glucose Metabolism Disorders	D012431, D011794, C006552, C004999	Quercetin, ferulic acid, kaempferol, Rutin
65558	Capparis spinosa	C18.452.584	Lipid Metabolism Disorders	D011794, D012431	Quercetin, Rutin
65558	Capparis spinosa	C20.543.480	Hypersensitivity, Immediate	D011794	Quercetin
65558	Capparis spinosa	C23.550.470	Inflammation	D011794, C004999	Quercetin, ferulic acid
65558	Capparis spinosa	C23.888.277	Edema	D011794, C073734	sinapinic acid, Quercetin
65558	Capparis spinosa	C23.888.592	Neurologic Manifestations	C004999, D012431, C073734, C058895, D011794	sinapinic acid, ferulic acid, 1-(2-methoxyphenyl)-4-(4-(2-phthalimido)butyl)piperazine, Quercetin, Rutin
65558	Capparis spinosa	C23.888.821	Signs and Symptoms, Digestive	D011794	Quercetin
65558	Capparis spinosa	C25.100.562	Chemical and Drug Induced Liver Injury	C073734, D011794, D012431	sinapinic acid, Quercetin, Rutin
65558	Capparis spinosa	C25.723.260	Chemical and Drug Induced Liver Injury	C073734, D011794, D012431	sinapinic acid, Quercetin, Rutin
4072	Capsicum annuum	C02.782.350	Flaviviridae Infections	D019207	beta Carotene
4072	Capsicum annuum	C04.557.470	Neoplasms, Glandular and Epithelial	C013015, D047310, C040015, D019207, C045651, D011794	beta Carotene, epigallocatechin gallate, Apigenin, Quercetin, myricetin, hesperetin
4072	Capsicum annuum	C04.588.180	Breast Neoplasms	D047310, D002392, C006552, C045651, D011794	epigallocatechin gallate, Catechin, Apigenin, kaempferol, Quercetin
4072	Capsicum annuum	C04.588.274	Digestive System Neoplasms	C013015, D047310, D002392, D019207, C045651, D011794	beta Carotene, epigallocatechin gallate, Catechin, Apigenin, Quercetin, hesperetin
4072	Capsicum annuum	C04.588.322	Endocrine Gland Neoplasms	D011794, D047311, C045651, D047310	Luteolin, Quercetin, epigallocatechin gallate, Apigenin
4072	Capsicum annuum	C04.588.945	Urogenital Neoplasms	D011794, C045651, D047310	Quercetin, epigallocatechin gallate, Apigenin
4072	Capsicum annuum	C04.697.098	Carcinogenesis	D047311, C040015, D002392, C006552, D011794	Catechin, Luteolin, kaempferol, Quercetin, myricetin
4072	Capsicum annuum	C06.301.371	Gastrointestinal Neoplasms	D011794, C013015, C045651, D047310	Quercetin, epigallocatechin gallate, hesperetin, Apigenin
4072	Capsicum annuum	C06.301.623	Liver Neoplasms	D011794, D002392, C045651, D019207	Quercetin, epigallocatechin gallate, Catechin, beta Carotene
4072	Capsicum annuum	C06.301.761	Pancreatic Neoplasms	D011794, C045651, D047310	Quercetin, epigallocatechin gallate, Apigenin
4072	Capsicum annuum	C06.405.249	Gastrointestinal Neoplasms	D011794, C013015, C045651, D047310	Quercetin, epigallocatechin gallate, hesperetin, Apigenin
4072	Capsicum annuum	C06.405.469	Intestinal Diseases	C013015, D047310, D019207, C045651, D011794	beta Carotene, epigallocatechin gallate, Apigenin, Quercetin, hesperetin
4072	Capsicum annuum	C06.405.748	Stomach Diseases	D011794, D019207	Quercetin, beta Carotene
4072	Capsicum annuum	C06.552.697	Liver Neoplasms	D011794, D002392, C045651, D019207	Quercetin, epigallocatechin gallate, Catechin, beta Carotene
4072	Capsicum annuum	C06.689.667	Pancreatic Neoplasms	D011794, C045651, D047310	Quercetin, epigallocatechin gallate, Apigenin
4072	Capsicum annuum	C08.127.108	Asthma	C045651	epigallocatechin gallate
4072	Capsicum annuum	C08.381.495	Lung Diseases, Obstructive	D011794, C045651	Quercetin, epigallocatechin gallate
4072	Capsicum annuum	C08.674.095	Asthma	C045651	epigallocatechin gallate
4072	Capsicum annuum	C10.228.140	Brain Diseases	D011794, C005273, D019207	Quercetin, naringenin, beta Carotene
4072	Capsicum annuum	C10.597.606	Neurobehavioral Manifestations	D011794, C005273	Quercetin, naringenin
4072	Capsicum annuum	C10.597.617	Pain	D011794, C013015	Quercetin, hesperetin
4072	Capsicum annuum	C10.668.829	Peripheral Nervous System Diseases	C013015	hesperetin
4072	Capsicum annuum	C12.294.260	Genital Neoplasms, Male	D011794, C045651, D047310	Quercetin, epigallocatechin gallate, Apigenin
4072	Capsicum annuum	C12.294.565	Prostatic Diseases	D011794, C045651, D047310	Quercetin, epigallocatechin gallate, Apigenin
4072	Capsicum annuum	C12.758.409	Genital Neoplasms, Male	D011794, C045651, D047310	Quercetin, epigallocatechin gallate, Apigenin
4072	Capsicum annuum	C12.777.829	Urinary Bladder Diseases	D011794, D002392	Quercetin, Catechin
4072	Capsicum annuum	C13.351.968	Urologic Diseases	D047311, C040015, D002392, C005273, C045651, D011794	epigallocatechin gallate, Catechin, Luteolin, Quercetin, myricetin, naringenin
4072	Capsicum annuum	C14.907.137	Arterial Occlusive Diseases	D002392, C005273, C006552, C045651, D011794	epigallocatechin gallate, Catechin, kaempferol, Quercetin, naringenin
4072	Capsicum annuum	C14.907.489	Hypertension	D011794, C045651	Quercetin, epigallocatechin gallate
4072	Capsicum annuum	C15.378.071	Anemia	D011794, D019207	Quercetin, beta Carotene
4072	Capsicum annuum	C17.800.090	Breast Diseases	D047310, D002392, C006552, C045651, D011794	epigallocatechin gallate, Catechin, Apigenin, kaempferol, Quercetin
4072	Capsicum annuum	C18.452.394	Glucose Metabolism Disorders	D002392, C479580, C005273, C006552, C045651, D011794	epigallocatechin gallate, Catechin, kaempferol, procyanidin B2, Quercetin, naringenin
4072	Capsicum annuum	C18.452.584	Lipid Metabolism Disorders	D011794, C005273	Quercetin, naringenin
4072	Capsicum annuum	C18.654.726	Overnutrition	D011794, C005273	Quercetin, naringenin
4072	Capsicum annuum	C19.344.421	Pancreatic Neoplasms	D011794, C045651, D047310	Quercetin, epigallocatechin gallate, Apigenin
4072	Capsicum annuum	C20.543.480	Hypersensitivity, Immediate	D011794, C045651	Quercetin, epigallocatechin gallate
4072	Capsicum annuum	C23.550.470	Inflammation	D011794, D047311, C045651, D047310	Luteolin, Quercetin, epigallocatechin gallate, Apigenin
4072	Capsicum annuum	C23.550.727	Neoplastic Processes	D047311, D047310, C040015, D002392, C005273, C006552, C045651, D011794	epigallocatechin gallate, Catechin, Apigenin, Luteolin, kaempferol, naringenin, Quercetin, myricetin
4072	Capsicum annuum	C23.888.144	Body Weight	C013015, D002392, C005273, D014975, C045651, D011794	Lutein, epigallocatechin gallate, Catechin, Quercetin, naringenin, hesperetin
4072	Capsicum annuum	C23.888.277	Edema	D011794, C045651	Quercetin, epigallocatechin gallate
4072	Capsicum annuum	C23.888.592	Neurologic Manifestations	C013015, D002392, C005273, C045651, D011794	epigallocatechin gallate, Catechin, Quercetin, naringenin, hesperetin
4072	Capsicum annuum	F03.625.562	Learning Disorders	D011794	Quercetin
4073	Capsicum frutescens	C18.452.394	Glucose Metabolism Disorders	D009655	Octopamine
4073	Capsicum frutescens	C23.550.727	Neoplastic Processes	C012037	solasodine
4073	Capsicum frutescens	C23.888.144	Body Weight	D009655	Octopamine
4222	Carthamus tinctorius	C04.557.465	Neoplasms, Germ Cell and Embryonal	D012431	Rutin
4222	Carthamus tinctorius	C04.557.470	Neoplasms, Glandular and Epithelial	D012431	Rutin
4222	Carthamus tinctorius	C04.557.580	Neoplasms, Nerve Tissue	D012431	Rutin
4222	Carthamus tinctorius	C04.557.665	Nevi and Melanomas	D012431	Rutin
4222	Carthamus tinctorius	C04.588.180	Breast Neoplasms	C006552	kaempferol
4222	Carthamus tinctorius	C04.697.098	Carcinogenesis	C006552	kaempferol
4222	Carthamus tinctorius	C05.116.198	Bone Diseases, Metabolic	C006552	kaempferol
4222	Carthamus tinctorius	C06.405.469	Intestinal Diseases	D012431	Rutin
4222	Carthamus tinctorius	C06.552.195	Chemical and Drug Induced Liver Injury	D012431, D017962	alpha-Linolenic Acid, Rutin
4222	Carthamus tinctorius	C06.552.241	Fatty Liver	D012431	Rutin
4222	Carthamus tinctorius	C10.228.140	Brain Diseases	D017962	alpha-Linolenic Acid
4222	Carthamus tinctorius	C10.228.662	Movement Disorders	D012431, D017962	alpha-Linolenic Acid, Rutin
4222	Carthamus tinctorius	C10.597.350	Dyskinesias	D012431	Rutin
4222	Carthamus tinctorius	C10.597.606	Neurobehavioral Manifestations	D017962	alpha-Linolenic Acid
4222	Carthamus tinctorius	C12.777.419	Kidney Diseases	D012431	Rutin
4222	Carthamus tinctorius	C13.351.968	Urologic Diseases	D012431	Rutin
4222	Carthamus tinctorius	C14.280.238	Cardiomyopathies	C006552	kaempferol
4222	Carthamus tinctorius	C14.907.137	Arterial Occlusive Diseases	C006552	kaempferol
4222	Carthamus tinctorius	C15.378.071	Anemia	D012431	Rutin
4222	Carthamus tinctorius	C16.320.850	Skin Diseases, Genetic	C001579	astragalin
4222	Carthamus tinctorius	C17.800.090	Breast Diseases	C006552	kaempferol
4222	Carthamus tinctorius	C17.800.174	Dermatitis	C001579	astragalin
4222	Carthamus tinctorius	C17.800.815	Skin Diseases, Eczematous	C001579	astragalin
4222	Carthamus tinctorius	C17.800.827	Skin Diseases, Genetic	C001579	astragalin
4222	Carthamus tinctorius	C18.452.104	Bone Diseases, Metabolic	C006552	kaempferol
4222	Carthamus tinctorius	C18.452.394	Glucose Metabolism Disorders	D012431, C006552	kaempferol, Rutin
4222	Carthamus tinctorius	C18.452.584	Lipid Metabolism Disorders	D012431	Rutin
4222	Carthamus tinctorius	C20.543.480	Hypersensitivity, Immediate	C001579	astragalin
4222	Carthamus tinctorius	C23.550.470	Inflammation	D017962	alpha-Linolenic Acid
4222	Carthamus tinctorius	C23.550.727	Neoplastic Processes	C006552	kaempferol
4222	Carthamus tinctorius	C23.888.592	Neurologic Manifestations	D012431, D017962	alpha-Linolenic Acid, Rutin
4222	Carthamus tinctorius	C25.100.562	Chemical and Drug Induced Liver Injury	D012431, D017962	alpha-Linolenic Acid, Rutin
4222	Carthamus tinctorius	C25.723.260	Chemical and Drug Induced Liver Injury	D012431, D017962	alpha-Linolenic Acid, Rutin
4222	Carthamus tinctorius	F03.600.300	Depressive Disorder	D017962	alpha-Linolenic Acid
48032	Carum carvi	C12.777.419	Kidney Diseases	D011794, D005707, D008353	Quercetin, Gallic Acid, Mannitol
48032	Carum carvi	C13.351.968	Urologic Diseases	D011794, D002392, D005707, D008353	Quercetin, Gallic Acid, Catechin, Mannitol
48032	Carum carvi	C14.907.489	Hypertension	D011794	Quercetin
48032	Carum carvi	C16.320.565	Metabolism, Inborn Errors	D002392	Catechin
48032	Carum carvi	C18.452.394	Glucose Metabolism Disorders	D011794, D002392, C006552, D005707	kaempferol, Quercetin, Gallic Acid, Catechin
48032	Carum carvi	C18.452.584	Lipid Metabolism Disorders	D011794, D005707	Quercetin, Gallic Acid
48032	Carum carvi	C18.452.648	Metabolism, Inborn Errors	D002392	Catechin
13427	Cichorium intybus	C04.557.337	Leukemia	D005707	Gallic Acid
13427	Cichorium intybus	C04.588.180	Breast Neoplasms	C002070	betulinic acid
13427	Cichorium intybus	C04.588.274	Digestive System Neoplasms	C002503, C010480	betulin, lupeol
13427	Cichorium intybus	C06.301.371	Gastrointestinal Neoplasms	C002503	betulin
13427	Cichorium intybus	C06.405.249	Gastrointestinal Neoplasms	C002503	betulin
13427	Cichorium intybus	C06.405.469	Intestinal Diseases	C007628, C002503, D005707	esculetin, betulin, Gallic Acid
13427	Cichorium intybus	C06.552.195	Chemical and Drug Induced Liver Injury	C025473, C040048	caffeic acid, gamma-sitosterol
13427	Cichorium intybus	C10.228.140	Brain Diseases	C040048	caffeic acid
13427	Cichorium intybus	C14.907.137	Arterial Occlusive Diseases	C040048	caffeic acid
13427	Cichorium intybus	C17.800.090	Breast Diseases	C002070	betulinic acid
13427	Cichorium intybus	C18.452.394	Glucose Metabolism Disorders	D005707	Gallic Acid
13427	Cichorium intybus	C23.550.727	Neoplastic Processes	D005707, C002070	betulinic acid, Gallic Acid
13427	Cichorium intybus	C23.888.277	Edema	C040048	caffeic acid
13427	Cichorium intybus	C23.888.592	Neurologic Manifestations	C040048, D015026	Zeatin, caffeic acid
13427	Cichorium intybus	C25.100.562	Chemical and Drug Induced Liver Injury	C025473, C040048	caffeic acid, gamma-sitosterol
13427	Cichorium intybus	C25.723.260	Chemical and Drug Induced Liver Injury	C025473, C040048	caffeic acid, gamma-sitosterol
119260	Cinnamomum aromaticum	C06.552.195	Chemical and Drug Induced Liver Injury	C030123	coumarin
119260	Cinnamomum aromaticum	C12.777.419	Kidney Diseases	C030123, C029010	coumarin, cinnamic acid
119260	Cinnamomum aromaticum	C13.351.968	Urologic Diseases	C030123, C029010	coumarin, cinnamic acid
119260	Cinnamomum aromaticum	C18.452.394	Glucose Metabolism Disorders	C030123	coumarin
119260	Cinnamomum aromaticum	C25.100.562	Chemical and Drug Induced Liver Injury	C030123	coumarin
119260	Cinnamomum aromaticum	C25.723.260	Chemical and Drug Induced Liver Injury	C030123	coumarin
119261	Cinnamomum burmannii	C18.452.394	Glucose Metabolism Disorders	C030123	coumarin
397098	Cinnamomum tamala	C18.452.394	Glucose Metabolism Disorders	C012843	cinnamic aldehyde
128608	Cinnamomum verum	C01.252.400	Gram-Negative Bacterial Infections	D005054	Eugenol
128608	Cinnamomum verum	C01.252.410	Gram-Positive Bacterial Infections	D005054	Eugenol
128608	Cinnamomum verum	C04.557.337	Leukemia	D011794, D005707	Quercetin, Gallic Acid
128608	Cinnamomum verum	C04.557.465	Neoplasms, Germ Cell and Embryonal	D011794, C040048, D005054, D005707	Quercetin, caffeic acid, Gallic Acid, Eugenol
128608	Cinnamomum verum	C04.557.580	Neoplasms, Nerve Tissue	D011794, C040048, D005054, D005707	Gallic Acid, Quercetin, caffeic acid, Eugenol
128608	Cinnamomum verum	C04.557.665	Nevi and Melanomas	C040048, D005054, D005707	Gallic Acid, caffeic acid, Eugenol
128608	Cinnamomum verum	C04.588.322	Endocrine Gland Neoplasms	D011794	Quercetin
128608	Cinnamomum verum	C04.697.098	Carcinogenesis	D011794, D002392, C006552	Quercetin, kaempferol, Catechin
128608	Cinnamomum verum	C05.651.542	Myalgia	D011794	Quercetin
128608	Cinnamomum verum	C06.405.205	Gastroenteritis	D011794	Quercetin
128608	Cinnamomum verum	C06.405.469	Intestinal Diseases	D011794, C006578, D005054, D005707	Quercetin, Gallic Acid, Eugenol, anethole
128608	Cinnamomum verum	C06.405.748	Stomach Diseases	D011794, C006578, D005054, D005707	Gallic Acid, Quercetin, Eugenol, anethole
128608	Cinnamomum verum	C06.552.195	Chemical and Drug Induced Liver Injury	D011794, D002392, C040048, D005054	Quercetin, caffeic acid, Eugenol, Catechin
128608	Cinnamomum verum	C06.552.241	Fatty Liver	D011794, D005707	Quercetin, Gallic Acid
128608	Cinnamomum verum	C10.228.140	Brain Diseases	D011794, C040048, D005054	Quercetin, caffeic acid, Eugenol
128608	Cinnamomum verum	C10.228.662	Movement Disorders	D011794, C018381, D005054, D005707	salvin, Quercetin, Gallic Acid, Eugenol
128608	Cinnamomum verum	C10.574.812	Parkinson Disease	D005054	Eugenol
128608	Cinnamomum verum	C10.597.617	Pain	D011794, D005054, C073316	Quercetin, Eugenol, carvacrol
128608	Cinnamomum verum	C10.668.491	Muscular Diseases	D011794	Quercetin
128608	Cinnamomum verum	C12.777.419	Kidney Diseases	D011794, D005707	Quercetin, Gallic Acid
128608	Cinnamomum verum	C13.351.500	Genital Diseases, Female	D011794, D005054	Quercetin, Eugenol
128608	Cinnamomum verum	C13.351.968	Urologic Diseases	D011794, D002392, D005707	Quercetin, Gallic Acid, Catechin
128608	Cinnamomum verum	C14.907.137	Arterial Occlusive Diseases	D002392, C040048, C006552, D011794, D020156	Catechin, Salicylic Acid, kaempferol, Quercetin, caffeic acid
128608	Cinnamomum verum	C14.907.253	Cerebrovascular Disorders	D011794	Quercetin
128608	Cinnamomum verum	C14.907.489	Hypertension	D011794	Quercetin
128608	Cinnamomum verum	C16.320.565	Metabolism, Inborn Errors	D002392	Catechin
128608	Cinnamomum verum	C16.320.700	Neoplastic Syndromes, Hereditary	D011794	Quercetin
128608	Cinnamomum verum	C18.452.394	Glucose Metabolism Disorders	D011794, D002392, C006552, D005707	kaempferol, Quercetin, Gallic Acid, Catechin
128608	Cinnamomum verum	C18.452.584	Lipid Metabolism Disorders	D011794, D005707	Quercetin, Gallic Acid
128608	Cinnamomum verum	C18.452.648	Metabolism, Inborn Errors	D002392	Catechin
128608	Cinnamomum verum	C18.654.726	Overnutrition	D011794	Quercetin
128608	Cinnamomum verum	C19.391.630	Ovarian Diseases	D011794	Quercetin
128608	Cinnamomum verum	C20.543.480	Hypersensitivity, Immediate	D011794, D005054	Quercetin, Eugenol
128608	Cinnamomum verum	C23.550.470	Inflammation	C041376, C040048, C073316, D011794, D005054, C006578	anethole, carvacrol, rosmarinic acid, Quercetin, caffeic acid, Eugenol
128608	Cinnamomum verum	C23.550.727	Neoplastic Processes	D002392, C006552, D005707, D011794, D005054, C006578	anethole, Catechin, Gallic Acid, kaempferol, Quercetin, Eugenol
128608	Cinnamomum verum	C23.550.891	Ulcer	D013943	Thymol
128608	Cinnamomum verum	C23.888.144	Body Weight	D011794, D002392	Quercetin, Catechin
128608	Cinnamomum verum	C23.888.592	Neurologic Manifestations	D002392, C040048, C073316, D005054, D011794, C018381, D020156, C006578	carvacrol, anethole, Catechin, Salicylic Acid, salvin, Quercetin, caffeic acid, Eugenol
128608	Cinnamomum verum	C23.888.821	Signs and Symptoms, Digestive	D011794	Quercetin
128608	Cinnamomum verum	C23.888.852	Signs and Symptoms, Respiratory	D011794	Quercetin
128608	Cinnamomum verum	C25.100.562	Chemical and Drug Induced Liver Injury	D011794, D002392, C040048, D005054	Quercetin, caffeic acid, Eugenol, Catechin
128608	Cinnamomum verum	C25.723.260	Chemical and Drug Induced Liver Injury	D011794, D002392, C040048, D005054	Quercetin, caffeic acid, Eugenol, Catechin
4047	Coriandrum sativum	C04.588.180	Breast Neoplasms	D011794, C006552, D047310	Quercetin, kaempferol, Apigenin
4047	Coriandrum sativum	C04.588.274	Digestive System Neoplasms	D011794, C013015, C008281, D047310	Quercetin, limonene, hesperetin, Apigenin
4047	Coriandrum sativum	C05.550.114	Arthritis	D047311, D047310	Luteolin, Apigenin
4047	Coriandrum sativum	C06.301.371	Gastrointestinal Neoplasms	D011794, C013015, D047310	Quercetin, hesperetin, Apigenin
4047	Coriandrum sativum	C06.405.249	Gastrointestinal Neoplasms	D011794, C013015, D047310	Quercetin, hesperetin, Apigenin
4047	Coriandrum sativum	C06.405.469	Intestinal Diseases	C013015, D047310, D012431, C008281, D005707, D011794	limonene, Apigenin, Gallic Acid, Quercetin, hesperetin, Rutin
4047	Coriandrum sativum	C06.552.195	Chemical and Drug Induced Liver Injury	C047368, C013015, C040048, D012431, C005273, D011794	3-methylquercetin, Quercetin, caffeic acid, naringenin, hesperetin, Rutin
4047	Coriandrum sativum	C10.228.140	Brain Diseases	D011794, C040048, C005273, D024505	Quercetin, caffeic acid, naringenin, Tocopherols
4047	Coriandrum sativum	C10.597.606	Neurobehavioral Manifestations	C040048, C005273, C008281, D011794, D004610	limonene, Ellagic Acid, Quercetin, caffeic acid, naringenin
4047	Coriandrum sativum	C10.597.617	Pain	D011794, C013015	Quercetin, hesperetin
4047	Coriandrum sativum	C17.800.090	Breast Diseases	D011794, C006552, D047310	Quercetin, kaempferol, Apigenin
4047	Coriandrum sativum	C18.452.394	Glucose Metabolism Disorders	D012431, C005273, C006552, D005707, D011794, D004610	Ellagic Acid, Gallic Acid, kaempferol, Quercetin, naringenin, Rutin
4047	Coriandrum sativum	C18.452.584	Lipid Metabolism Disorders	D012431, C005273, D005707, D011794, C018584	linalool, Gallic Acid, Quercetin, naringenin, Rutin
4047	Coriandrum sativum	C19.246.240	Diabetes Mellitus, Experimental	D011794, D005707	Quercetin, Gallic Acid
4047	Coriandrum sativum	C23.550.737	Nerve Degeneration	D011794, C040048	Quercetin, caffeic acid
4047	Coriandrum sativum	C23.888.144	Body Weight	D011794, C013015, C005273	Quercetin, naringenin, hesperetin
4047	Coriandrum sativum	C23.888.592	Neurologic Manifestations	C013015, C040048, D012431, C005273, C008281, D011794, D004610	limonene, Ellagic Acid, Quercetin, caffeic acid, naringenin, hesperetin, Rutin
4047	Coriandrum sativum	C23.888.821	Signs and Symptoms, Digestive	D011794	Quercetin
4047	Coriandrum sativum	C25.100.562	Chemical and Drug Induced Liver Injury	C047368, C013015, C040048, D012431, C005273, D011794	3-methylquercetin, Quercetin, caffeic acid, naringenin, hesperetin, Rutin
4047	Coriandrum sativum	C25.723.260	Chemical and Drug Induced Liver Injury	C047368, C013015, C040048, D012431, C005273, D011794	3-methylquercetin, Quercetin, caffeic acid, naringenin, hesperetin, Rutin
4047	Coriandrum sativum	C25.723.705	Neurotoxicity Syndromes	D012431, D011794	Quercetin, Rutin
4047	Coriandrum sativum	F03.615.200	Amnesia	C005273	naringenin
82528	Crocus sativus	C04.588.180	Breast Neoplasms	C006552	kaempferol
82528	Crocus sativus	C04.588.945	Urogenital Neoplasms	D014498	Uracil
82528	Crocus sativus	C04.697.098	Carcinogenesis	C006552	kaempferol
82528	Crocus sativus	C04.697.650	Neoplasm Metastasis	D014498	Uracil
82528	Crocus sativus	C06.405.748	Stomach Diseases	D000241	Adenosine
82528	Crocus sativus	C06.552.195	Chemical and Drug Induced Liver Injury	D009536	Niacinamide
82528	Crocus sativus	C08.127.108	Asthma	D000241	Adenosine
82528	Crocus sativus	C08.381.495	Lung Diseases, Obstructive	D000241	Adenosine
82528	Crocus sativus	C08.674.095	Asthma	D000241	Adenosine
82528	Crocus sativus	C10.228.140	Brain Diseases	D000241, D009536, D019817, C029036	Niacinamide, Benzoic Acid, crocin, Adenosine
82528	Crocus sativus	C10.228.662	Movement Disorders	C029036	crocin
82528	Crocus sativus	C10.597.350	Dyskinesias	D009536, C015358	methylparaben, Niacinamide
82528	Crocus sativus	C10.597.606	Neurobehavioral Manifestations	C015358	methylparaben
82528	Crocus sativus	C10.597.617	Pain	D000241	Adenosine
82528	Crocus sativus	C10.597.751	Sensation Disorders	D000241	Adenosine
82528	Crocus sativus	C12.777.419	Kidney Diseases	D000241, C029036	crocin, Adenosine
82528	Crocus sativus	C13.351.968	Urologic Diseases	D014498, D000241, C029036	Uracil, Adenosine, crocin
82528	Crocus sativus	C14.280.067	Arrhythmias, Cardiac	D000241	Adenosine
82528	Crocus sativus	C14.280.238	Cardiomyopathies	D000241, C006552	kaempferol, Adenosine
82528	Crocus sativus	C14.280.647	Myocardial Ischemia	D000241	Adenosine
82528	Crocus sativus	C14.907.137	Arterial Occlusive Diseases	C006552, C029036	kaempferol, crocin
82528	Crocus sativus	C14.907.253	Cerebrovascular Disorders	D009536	Niacinamide
82528	Crocus sativus	C14.907.489	Hypertension	D000241	Adenosine
82528	Crocus sativus	C14.907.514	Hypotension	C029036	crocin
82528	Crocus sativus	C14.907.585	Myocardial Ischemia	D000241	Adenosine
82528	Crocus sativus	C16.320.565	Metabolism, Inborn Errors	D019817	Benzoic Acid
82528	Crocus sativus	C16.320.850	Skin Diseases, Genetic	C001579	astragalin
82528	Crocus sativus	C17.800.090	Breast Diseases	C006552	kaempferol
82528	Crocus sativus	C17.800.827	Skin Diseases, Genetic	C001579	astragalin
82528	Crocus sativus	C18.452.132	Brain Diseases, Metabolic	D019817	Benzoic Acid
82528	Crocus sativus	C18.452.394	Glucose Metabolism Disorders	C010561, D009536, C064309, C006552	kaempferol 3-O-sophoroside, kaempferol, crocetin, Niacinamide
82528	Crocus sativus	C18.452.584	Lipid Metabolism Disorders	C029036	crocin
82528	Crocus sativus	C18.452.648	Metabolism, Inborn Errors	D019817	Benzoic Acid
82528	Crocus sativus	C18.452.660	Mitochondrial Diseases	D019817	Benzoic Acid
82528	Crocus sativus	C18.654.726	Overnutrition	C032171	4-coumaric acid
82528	Crocus sativus	C20.543.480	Hypersensitivity, Immediate	C001579, D000241	astragalin, Adenosine
82528	Crocus sativus	C23.550.073	Arrhythmias, Cardiac	D000241	Adenosine
82528	Crocus sativus	C23.550.161	Cardiotoxicity	C032171, C029036	4-coumaric acid, crocin
82528	Crocus sativus	C23.550.470	Inflammation	C064309, C029036	kaempferol 3-O-sophoroside, crocin
82528	Crocus sativus	C23.550.717	Necrosis	D000241, C029036	Adenosine, crocin
82528	Crocus sativus	C23.550.727	Neoplastic Processes	C006552, D014498	kaempferol, Uracil
82528	Crocus sativus	C23.550.737	Nerve Degeneration	D000241, D009536	Niacinamide, Adenosine
82528	Crocus sativus	C23.888.144	Body Weight	C032171	4-coumaric acid
82528	Crocus sativus	C23.888.592	Neurologic Manifestations	D009536, D000241, C015358	methylparaben, Niacinamide, Adenosine
82528	Crocus sativus	C25.100.389	Cardiotoxicity	C032171, C029036	4-coumaric acid, crocin
82528	Crocus sativus	C25.100.562	Chemical and Drug Induced Liver Injury	D009536	Niacinamide
82528	Crocus sativus	C25.723.260	Chemical and Drug Induced Liver Injury	D009536	Niacinamide
82528	Crocus sativus	C25.723.705	Neurotoxicity Syndromes	C015358	methylparaben
82528	Crocus sativus	C26.733.266	Cardiotoxicity	C032171, C029036	4-coumaric acid, crocin
82528	Crocus sativus	F03.600.300	Depressive Disorder	C029036	crocin
82528	Crocus sativus	F03.615.250	Cognition Disorders	C015358, C029036	methylparaben, crocin
52462	Cuminum cyminum	C01.252.400	Gram-Negative Bacterial Infections	D005054	Eugenol
52462	Cuminum cyminum	C01.252.410	Gram-Positive Bacterial Infections	D005054	Eugenol
52462	Cuminum cyminum	C04.557.470	Neoplasms, Glandular and Epithelial	D011794, C018381, C006578, D047310	Apigenin, salvin, Quercetin, anethole
52462	Cuminum cyminum	C04.588.274	Digestive System Neoplasms	D047310, D002392, C008281, D011794, D005054	limonene, Catechin, Apigenin, Quercetin, Eugenol
52462	Cuminum cyminum	C06.301.371	Gastrointestinal Neoplasms	D011794, D005054, D047310	Quercetin, Eugenol, Apigenin
52462	Cuminum cyminum	C06.301.623	Liver Neoplasms	D011794, D002392, C008281	Quercetin, Catechin, limonene
52462	Cuminum cyminum	C06.405.249	Gastrointestinal Neoplasms	D011794, D005054, D047310	Quercetin, Eugenol, Apigenin
52462	Cuminum cyminum	C06.405.469	Intestinal Diseases	D047310, D005707, C008281, D011794, D005054, C006578	limonene, anethole, Apigenin, Gallic Acid, Quercetin, Eugenol
52462	Cuminum cyminum	C06.405.748	Stomach Diseases	D005707, C008281, D011794, D005054, C006578	limonene, anethole, Gallic Acid, Quercetin, Eugenol
52462	Cuminum cyminum	C06.552.195	Chemical and Drug Induced Liver Injury	D002392, C040048, C005273, D011794, D005054	Catechin, Quercetin, caffeic acid, naringenin, Eugenol
52462	Cuminum cyminum	C06.552.697	Liver Neoplasms	D011794, D002392, C008281	Quercetin, Catechin, limonene
52462	Cuminum cyminum	C08.618.846	Respiratory Insufficiency	D011794	Quercetin
52462	Cuminum cyminum	C10.228.140	Brain Diseases	D011794, C040048, C005273, D005054	Quercetin, caffeic acid, naringenin, Eugenol
52462	Cuminum cyminum	C10.597.617	Pain	C007210, D011794, D005054, C073316	Quercetin, carvacrol, Eugenol, 4-cymene
52462	Cuminum cyminum	C11.510.245	Cataract	D047311	Luteolin
52462	Cuminum cyminum	C14.907.489	Hypertension	D011794	Quercetin
52462	Cuminum cyminum	C16.320.565	Metabolism, Inborn Errors	D002392	Catechin
52462	Cuminum cyminum	C18.452.394	Glucose Metabolism Disorders	D002392, C024714, C005273, C006552, D005707, D011794	caryophyllene, Catechin, Gallic Acid, kaempferol, Quercetin, naringenin
52462	Cuminum cyminum	C18.452.584	Lipid Metabolism Disorders	D011794, C018584, C005273, D005707	Quercetin, linalool, Gallic Acid, naringenin
52462	Cuminum cyminum	C18.452.648	Metabolism, Inborn Errors	D002392	Catechin
52462	Cuminum cyminum	C18.654.726	Overnutrition	D011794, C005273	Quercetin, naringenin
52462	Cuminum cyminum	C23.550.891	Ulcer	D013943	Thymol
52462	Cuminum cyminum	C23.888.144	Body Weight	D011794, D002392, C005273, C024714	Quercetin, naringenin, caryophyllene, Catechin
52462	Cuminum cyminum	C23.888.592	Neurologic Manifestations	C007210, D002392, C040048, C073316, C005273, C008281, D011794, C018381, D005054, C006578	limonene, carvacrol, anethole, Catechin, salvin, Quercetin, caffeic acid, naringenin, Eugenol, 4-cymene
52462	Cuminum cyminum	C23.888.821	Signs and Symptoms, Digestive	D011794	Quercetin
52462	Cuminum cyminum	C25.100.562	Chemical and Drug Induced Liver Injury	D002392, C040048, C005273, D011794, D005054	Catechin, Quercetin, caffeic acid, naringenin, Eugenol
52462	Cuminum cyminum	C25.723.260	Chemical and Drug Induced Liver Injury	D002392, C040048, C005273, D011794, D005054	Catechin, Quercetin, caffeic acid, naringenin, Eugenol
136217	Curcuma longa	C01.252.400	Gram-Negative Bacterial Infections	D003474	Curcumin
136217	Curcuma longa	C01.539.757	Sepsis	D003474	Curcumin
136217	Curcuma longa	C04.557.337	Leukemia	D003474	Curcumin
136217	Curcuma longa	C04.557.386	Lymphoma	D003474	Curcumin
136217	Curcuma longa	C04.557.450	Neoplasms, Connective and Soft Tissue	D003474	Curcumin
136217	Curcuma longa	C04.557.465	Neoplasms, Germ Cell and Embryonal	D003474	Curcumin
136217	Curcuma longa	C04.557.470	Neoplasms, Glandular and Epithelial	D003474	Curcumin
136217	Curcuma longa	C04.557.580	Neoplasms, Nerve Tissue	D003474	Curcumin
136217	Curcuma longa	C04.557.595	Neoplasms, Plasma Cell	D003474	Curcumin
136217	Curcuma longa	C04.557.665	Nevi and Melanomas	D003474	Curcumin
136217	Curcuma longa	C04.588.180	Breast Neoplasms	D003474	Curcumin
136217	Curcuma longa	C04.588.274	Digestive System Neoplasms	D003474	Curcumin
136217	Curcuma longa	C04.588.322	Endocrine Gland Neoplasms	D003474	Curcumin
136217	Curcuma longa	C04.588.443	Head and Neck Neoplasms	D003474	Curcumin
136217	Curcuma longa	C04.588.614	Nervous System Neoplasms	D003474	Curcumin
136217	Curcuma longa	C04.588.805	Skin Neoplasms	D003474	Curcumin
136217	Curcuma longa	C04.588.894	Thoracic Neoplasms	D003474	Curcumin
136217	Curcuma longa	C04.588.945	Urogenital Neoplasms	D003474	Curcumin
136217	Curcuma longa	C05.116.198	Bone Diseases, Metabolic	D003474	Curcumin
136217	Curcuma longa	C05.550.114	Arthritis	D003474	Curcumin
136217	Curcuma longa	C05.799.114	Arthritis, Rheumatoid	D003474	Curcumin
136217	Curcuma longa	C05.799.613	Osteoarthritis	D003474	Curcumin
136217	Curcuma longa	C06.301.371	Gastrointestinal Neoplasms	D003474	Curcumin
136217	Curcuma longa	C06.301.623	Liver Neoplasms	D003474	Curcumin
136217	Curcuma longa	C06.301.761	Pancreatic Neoplasms	D003474	Curcumin
136217	Curcuma longa	C06.405.205	Gastroenteritis	D003474	Curcumin
136217	Curcuma longa	C06.405.249	Gastrointestinal Neoplasms	D003474	Curcumin
136217	Curcuma longa	C06.405.469	Intestinal Diseases	D003474	Curcumin
136217	Curcuma longa	C06.405.748	Stomach Diseases	D003474	Curcumin
136217	Curcuma longa	C06.552.195	Chemical and Drug Induced Liver Injury	D003474	Curcumin
136217	Curcuma longa	C06.552.241	Fatty Liver	D003474	Curcumin
136217	Curcuma longa	C06.552.630	Liver Cirrhosis	D003474	Curcumin
136217	Curcuma longa	C06.552.697	Liver Neoplasms	D003474	Curcumin
136217	Curcuma longa	C06.689.667	Pancreatic Neoplasms	D003474	Curcumin
136217	Curcuma longa	C07.465.565	Mouth Neoplasms	D003474	Curcumin
136217	Curcuma longa	C08.381.495	Lung Diseases, Obstructive	D003474	Curcumin
136217	Curcuma longa	C08.381.520	Lung Injury	D003474	Curcumin
136217	Curcuma longa	C08.381.540	Lung Neoplasms	D003474	Curcumin
136217	Curcuma longa	C08.785.520	Lung Neoplasms	D003474	Curcumin
136217	Curcuma longa	C10.228.140	Brain Diseases	D003474	Curcumin
136217	Curcuma longa	C10.228.662	Movement Disorders	D003474	Curcumin
136217	Curcuma longa	C10.228.854	Spinal Cord Diseases	D003474	Curcumin
136217	Curcuma longa	C10.551.240	Central Nervous System Neoplasms	D003474	Curcumin
136217	Curcuma longa	C10.574.945	Tauopathies	D003474	Curcumin
136217	Curcuma longa	C10.597.606	Neurobehavioral Manifestations	C050229, D003474	Curcumin, demethoxycurcumin
136217	Curcuma longa	C10.597.742	Seizures	D003474	Curcumin
136217	Curcuma longa	C10.668.491	Muscular Diseases	D003474	Curcumin
136217	Curcuma longa	C10.668.829	Peripheral Nervous System Diseases	D003474	Curcumin
136217	Curcuma longa	C10.720.475	Heavy Metal Poisoning, Nervous System	D003474	Curcumin
136217	Curcuma longa	C12.294.260	Genital Neoplasms, Male	D003474	Curcumin
136217	Curcuma longa	C12.294.565	Prostatic Diseases	D003474	Curcumin
136217	Curcuma longa	C12.758.409	Genital Neoplasms, Male	D003474	Curcumin
136217	Curcuma longa	C12.777.419	Kidney Diseases	D003474	Curcumin
136217	Curcuma longa	C12.777.934	Urination Disorders	D003474	Curcumin
136217	Curcuma longa	C13.351.500	Genital Diseases, Female	D003474	Curcumin
136217	Curcuma longa	C13.351.968	Urologic Diseases	D003474	Curcumin
136217	Curcuma longa	C14.280.195	Cardiomegaly	D003474	Curcumin
136217	Curcuma longa	C14.280.238	Cardiomyopathies	D003474	Curcumin
136217	Curcuma longa	C14.280.647	Myocardial Ischemia	D003474	Curcumin
136217	Curcuma longa	C14.907.137	Arterial Occlusive Diseases	D003474	Curcumin
136217	Curcuma longa	C14.907.253	Cerebrovascular Disorders	D003474	Curcumin
136217	Curcuma longa	C14.907.454	Hemostatic Disorders	D003474	Curcumin
136217	Curcuma longa	C14.907.489	Hypertension	D003474	Curcumin
136217	Curcuma longa	C14.907.585	Myocardial Ischemia	D003474	Curcumin
136217	Curcuma longa	C15.378.147	Blood Protein Disorders	D003474	Curcumin
136217	Curcuma longa	C15.378.463	Hemorrhagic Disorders	D003474	Curcumin
136217	Curcuma longa	C15.604.515	Lymphoproliferative Disorders	D003474	Curcumin
136217	Curcuma longa	C17.300.775	Rheumatic Diseases	D003474	Curcumin
136217	Curcuma longa	C17.800.090	Breast Diseases	D003474	Curcumin
136217	Curcuma longa	C17.800.882	Skin Neoplasms	D003474	Curcumin
136217	Curcuma longa	C18.452.104	Bone Diseases, Metabolic	D003474	Curcumin
136217	Curcuma longa	C18.452.394	Glucose Metabolism Disorders	D003474	Curcumin
136217	Curcuma longa	C18.452.584	Lipid Metabolism Disorders	D003474	Curcumin
136217	Curcuma longa	C18.654.726	Overnutrition	D003474	Curcumin
136217	Curcuma longa	C19.246.099	Diabetes Complications	D003474	Curcumin
136217	Curcuma longa	C19.344.421	Pancreatic Neoplasms	D003474	Curcumin
136217	Curcuma longa	C19.391.630	Ovarian Diseases	D003474	Curcumin
136217	Curcuma longa	C20.111.199	Arthritis, Rheumatoid	D003474	Curcumin
136217	Curcuma longa	C20.683.515	Lymphoproliferative Disorders	D003474	Curcumin
136217	Curcuma longa	C20.683.780	Paraproteinemias	D003474	Curcumin
136217	Curcuma longa	C23.300.775	Hypertrophy	D003474	Curcumin
136217	Curcuma longa	C23.550.355	Fibrosis	D003474	Curcumin
136217	Curcuma longa	C23.550.403	Hemolysis	D003474	Curcumin
136217	Curcuma longa	C23.550.414	Hemorrhage	D003474	Curcumin
136217	Curcuma longa	C23.550.470	Inflammation	D003474	Curcumin
136217	Curcuma longa	C23.550.717	Necrosis	D003474	Curcumin
136217	Curcuma longa	C23.550.727	Neoplastic Processes	C050229, D003474	Curcumin, demethoxycurcumin
136217	Curcuma longa	C23.550.891	Ulcer	D003474	Curcumin
136217	Curcuma longa	C23.888.144	Body Weight	D003474	Curcumin
136217	Curcuma longa	C23.888.592	Neurologic Manifestations	C050229, D003474	Curcumin, demethoxycurcumin
136217	Curcuma longa	C23.888.821	Signs and Symptoms, Digestive	D003474	Curcumin
136217	Curcuma longa	C23.888.942	Urological Manifestations	D003474	Curcumin
136217	Curcuma longa	C25.100.562	Chemical and Drug Induced Liver Injury	D003474	Curcumin
136217	Curcuma longa	C25.723.097	Arsenic Poisoning	D003474	Curcumin
136217	Curcuma longa	C25.723.260	Chemical and Drug Induced Liver Injury	D003474	Curcumin
136217	Curcuma longa	C25.723.705	Neurotoxicity Syndromes	D003474	Curcumin
136217	Curcuma longa	F03.615.200	Amnesia	C050229, D003474	Curcumin, demethoxycurcumin
136217	Curcuma longa	F03.615.250	Cognition Disorders	D003474	Curcumin
136217	Curcuma longa	F03.615.400	Dementia	D003474	Curcumin
136224	Curcuma zedoaria	C04.557.337	Leukemia	D003474	Curcumin
136224	Curcuma zedoaria	C04.557.465	Neoplasms, Germ Cell and Embryonal	D003474	Curcumin
136224	Curcuma zedoaria	C04.557.580	Neoplasms, Nerve Tissue	D003474	Curcumin
136224	Curcuma zedoaria	C04.557.665	Nevi and Melanomas	D003474	Curcumin
136224	Curcuma zedoaria	C04.588.180	Breast Neoplasms	D003474	Curcumin
136224	Curcuma zedoaria	C04.588.274	Digestive System Neoplasms	D003474	Curcumin
136224	Curcuma zedoaria	C04.588.443	Head and Neck Neoplasms	D003474	Curcumin
136224	Curcuma zedoaria	C04.588.894	Thoracic Neoplasms	D003474	Curcumin
136224	Curcuma zedoaria	C06.301.371	Gastrointestinal Neoplasms	D003474	Curcumin
136224	Curcuma zedoaria	C06.405.249	Gastrointestinal Neoplasms	D003474	Curcumin
136224	Curcuma zedoaria	C06.405.748	Stomach Diseases	D003474	Curcumin
136224	Curcuma zedoaria	C08.381.540	Lung Neoplasms	D003474	Curcumin
136224	Curcuma zedoaria	C08.785.520	Lung Neoplasms	D003474	Curcumin
136224	Curcuma zedoaria	C17.800.090	Breast Diseases	D003474	Curcumin
136224	Curcuma zedoaria	C18.452.584	Lipid Metabolism Disorders	D003474	Curcumin
136224	Curcuma zedoaria	C23.550.470	Inflammation	D003474	Curcumin
136224	Curcuma zedoaria	C23.888.821	Signs and Symptoms, Digestive	D003474	Curcumin
105181	Elettaria cardamomum	C06.405.748	Stomach Diseases	D005707	Gallic Acid
105181	Elettaria cardamomum	C06.552.241	Fatty Liver	D005707	Gallic Acid
105181	Elettaria cardamomum	C18.452.394	Glucose Metabolism Disorders	D005707	Gallic Acid
105181	Elettaria cardamomum	C18.452.584	Lipid Metabolism Disorders	D005707	Gallic Acid
105181	Elettaria cardamomum	C23.550.727	Neoplastic Processes	D005707	Gallic Acid
188493	Etlingera elatior	C06.552.195	Chemical and Drug Induced Liver Injury	D002392, D002726	Chlorogenic Acid, Catechin
188493	Etlingera elatior	C25.100.562	Chemical and Drug Induced Liver Injury	D002392, D002726	Chlorogenic Acid, Catechin
188493	Etlingera elatior	C25.723.260	Chemical and Drug Induced Liver Injury	D002392, D002726	Chlorogenic Acid, Catechin
52471	Ferula assa-foetida	C04.588.180	Breast Neoplasms	D019301	Oleic Acid
52471	Ferula assa-foetida	C05.651.197	Contracture	C056493	imiquimod
52471	Ferula assa-foetida	C06.552.195	Chemical and Drug Induced Liver Injury	C025473	gamma-sitosterol
52471	Ferula assa-foetida	C10.228.140	Brain Diseases	C004999	ferulic acid
52471	Ferula assa-foetida	C10.597.606	Neurobehavioral Manifestations	C058895	1-(2-methoxyphenyl)-4-(4-(2-phthalimido)butyl)piperazine
52471	Ferula assa-foetida	C10.597.742	Seizures	C004999	ferulic acid
52471	Ferula assa-foetida	C17.800.090	Breast Diseases	D019301	Oleic Acid
52471	Ferula assa-foetida	C18.452.394	Glucose Metabolism Disorders	C031477, C004999	7-hydroxycoumarin, ferulic acid
52471	Ferula assa-foetida	C23.888.592	Neurologic Manifestations	C058895, C004999	1-(2-methoxyphenyl)-4-(4-(2-phthalimido)butyl)piperazine, ferulic acid
52471	Ferula assa-foetida	C25.100.562	Chemical and Drug Induced Liver Injury	C025473	gamma-sitosterol
52471	Ferula assa-foetida	C25.723.260	Chemical and Drug Induced Liver Injury	C025473	gamma-sitosterol
52471	Ferula assa-foetida	F03.615.200	Amnesia	C058895	1-(2-methoxyphenyl)-4-(4-(2-phthalimido)butyl)piperazine
48038	Foeniculum vulgare	C01.539.757	Sepsis	D011794	Quercetin
48038	Foeniculum vulgare	C04.557.465	Neoplasms, Germ Cell and Embryonal	C004999, D047310, C040015, C040048, C029010, D005707, D011794	Apigenin, ferulic acid, Gallic Acid, cinnamic acid, Quercetin, caffeic acid, myricetin
48038	Foeniculum vulgare	C04.557.580	Neoplasms, Nerve Tissue	C004999, C040015, D047310, C040048, C029010, D005707, D011794	Apigenin, Quercetin, ferulic acid, Gallic Acid, cinnamic acid, myricetin, caffeic acid
48038	Foeniculum vulgare	C04.557.665	Nevi and Melanomas	C004999, D047310, C040048, C029010, D005707	Apigenin, ferulic acid, Gallic Acid, cinnamic acid, caffeic acid
48038	Foeniculum vulgare	C04.588.274	Digestive System Neoplasms	D011794, C008281, D047310	Quercetin, limonene, Apigenin
48038	Foeniculum vulgare	C04.697.098	Carcinogenesis	D011794, D047311, C040015, C006552	Luteolin, Quercetin, myricetin, kaempferol
48038	Foeniculum vulgare	C06.301.371	Gastrointestinal Neoplasms	D011794, D047310	Quercetin, Apigenin
48038	Foeniculum vulgare	C06.405.249	Gastrointestinal Neoplasms	D011794, D047310	Quercetin, Apigenin
48038	Foeniculum vulgare	C06.405.469	Intestinal Diseases	D047310, D011801, D005707, C008281, D011794, C006578	Quinic Acid, limonene, anethole, Apigenin, Gallic Acid, Quercetin
48038	Foeniculum vulgare	C06.405.748	Stomach Diseases	D011801, D005707, C008281, D011794, C006578	Quinic Acid, limonene, anethole, Gallic Acid, Quercetin
48038	Foeniculum vulgare	C10.228.140	Brain Diseases	D024505, C004999, C040048, C073734, C005273, D011794	Tocopherols, sinapinic acid, ferulic acid, Quercetin, caffeic acid, naringenin
48038	Foeniculum vulgare	C10.597.622	Paralysis	C006578	anethole
48038	Foeniculum vulgare	C12.777.419	Kidney Diseases	D047311, C040015, C029010, D009828, C005273, D005707, D011794	Oleanolic Acid, Luteolin, Gallic Acid, cinnamic acid, Quercetin, naringenin, myricetin
48038	Foeniculum vulgare	C13.351.500	Genital Diseases, Female	D011794, D047311	Luteolin, Quercetin
48038	Foeniculum vulgare	C13.351.968	Urologic Diseases	D047311, C040015, C029010, D009828, C005273, D005707, D011794	Oleanolic Acid, Luteolin, Gallic Acid, cinnamic acid, Quercetin, naringenin, myricetin
48038	Foeniculum vulgare	C18.452.394	Glucose Metabolism Disorders	C031477, C004999, C110309, D009828, C005273, C006552, D005707, D011794	Oleanolic Acid, quercetin 3-O-glucopyranoside, 7-hydroxycoumarin, ferulic acid, Gallic Acid, kaempferol, Quercetin, naringenin
48038	Foeniculum vulgare	C19.391.630	Ovarian Diseases	D011794, D047311	Luteolin, Quercetin
48038	Foeniculum vulgare	C23.550.355	Fibrosis	D011794, D005707	Quercetin, Gallic Acid
48038	Foeniculum vulgare	C23.550.470	Inflammation	C047368, D047311, C004999, D047310, C040048, C082097, D009828, D011794, C006578	Oleanolic Acid, 3-methylquercetin, anethole, tocotrienol, delta, Apigenin, Luteolin, ferulic acid, Quercetin, caffeic acid
48038	Foeniculum vulgare	C23.550.727	Neoplastic Processes	D047311, D047310, C040015, D009828, C005273, C006552, D005707, D011794, C006578	Oleanolic Acid, anethole, Apigenin, Luteolin, Gallic Acid, kaempferol, Quercetin, naringenin, myricetin
48038	Foeniculum vulgare	C23.550.737	Nerve Degeneration	D011794, C040048	Quercetin, caffeic acid
48038	Foeniculum vulgare	C23.888.592	Neurologic Manifestations	C004999, C040048, C073734, C005273, C008281, D011794, D020156, C006578	limonene, anethole, sinapinic acid, Salicylic Acid, ferulic acid, Quercetin, caffeic acid, naringenin
48038	Foeniculum vulgare	C23.888.821	Signs and Symptoms, Digestive	D011794	Quercetin
157519	Gaultheria procumbens	C23.888.592	Neurologic Manifestations	D020156, C009135	2,3-dihydroxybenzoic acid, Salicylic Acid
3311	Ginkgo biloba	C04.557.465	Neoplasms, Germ Cell and Embryonal	D012431, D008715, D047310	Apigenin, Methionine, Rutin
3311	Ginkgo biloba	C04.557.470	Neoplasms, Glandular and Epithelial	D012431, D008715, D047310	Rutin, Methionine, Apigenin
3311	Ginkgo biloba	C04.557.580	Neoplasms, Nerve Tissue	D012431, D008715, D047310	Apigenin, Methionine, Rutin
3311	Ginkgo biloba	C04.557.665	Nevi and Melanomas	D012431, D047310	Apigenin, Rutin
3311	Ginkgo biloba	C04.588.180	Breast Neoplasms	D002392, C006552, D047310	kaempferol, Catechin, Apigenin
3311	Ginkgo biloba	C04.588.274	Digestive System Neoplasms	D002392, D008715, D047310	Methionine, Catechin, Apigenin
3311	Ginkgo biloba	C04.588.322	Endocrine Gland Neoplasms	D047310	Apigenin
3311	Ginkgo biloba	C04.588.805	Skin Neoplasms	D047310	Apigenin
3311	Ginkgo biloba	C04.697.098	Carcinogenesis	D002392, C016527, C006552	isoquercitrin, kaempferol, Catechin
3311	Ginkgo biloba	C04.697.650	Neoplasm Metastasis	D002392, D047310	Catechin, Apigenin
3311	Ginkgo biloba	C05.116.198	Bone Diseases, Metabolic	C006552	kaempferol
3311	Ginkgo biloba	C05.550.114	Arthritis	D047310	Apigenin
3311	Ginkgo biloba	C05.651.515	Muscle Weakness	C011164	amentoflavone
3311	Ginkgo biloba	C06.301.371	Gastrointestinal Neoplasms	D047310	Apigenin
3311	Ginkgo biloba	C06.301.623	Liver Neoplasms	D002392, D008715	Methionine, Catechin
3311	Ginkgo biloba	C06.301.761	Pancreatic Neoplasms	D047310	Apigenin
3311	Ginkgo biloba	C06.405.249	Gastrointestinal Neoplasms	D047310	Apigenin
3311	Ginkgo biloba	C06.405.469	Intestinal Diseases	D012431, D011801, D047310	Quinic Acid, Rutin, Apigenin
3311	Ginkgo biloba	C06.552.195	Chemical and Drug Induced Liver Injury	C047368, D002392, C054125, D008715, D012431, C025473	3-methylquercetin, Catechin, gamma-sitosterol, sesamin, Methionine, Rutin
3311	Ginkgo biloba	C06.552.630	Liver Cirrhosis	C047368, D008715	3-methylquercetin, Methionine
3311	Ginkgo biloba	C06.552.697	Liver Neoplasms	D002392, D008715	Methionine, Catechin
3311	Ginkgo biloba	C06.689.667	Pancreatic Neoplasms	D047310	Apigenin
3311	Ginkgo biloba	C08.381.520	Lung Injury	D012431	Rutin
3311	Ginkgo biloba	C09.218.458	Hearing Disorders	D002392, D008715	Methionine, Catechin
3311	Ginkgo biloba	C10.228.140	Brain Diseases	C054125, D008715	Methionine, sesamin
3311	Ginkgo biloba	C10.228.662	Movement Disorders	D012431, C077458, C054125	Rutin, ginkgetin, sesamin
3311	Ginkgo biloba	C10.228.854	Spinal Cord Diseases	D008715	Methionine
3311	Ginkgo biloba	C10.597.350	Dyskinesias	D012431, C011164, C077458, C054125	ginkgetin, sesamin, amentoflavone, Rutin
3311	Ginkgo biloba	C10.597.606	Neurobehavioral Manifestations	C011164	amentoflavone
3311	Ginkgo biloba	C10.597.613	Neuromuscular Manifestations	C011164	amentoflavone
3311	Ginkgo biloba	C10.597.617	Pain	C012526	quercitrin
3311	Ginkgo biloba	C10.597.622	Paralysis	D012431	Rutin
3311	Ginkgo biloba	C10.597.742	Seizures	D008715	Methionine
3311	Ginkgo biloba	C10.597.751	Sensation Disorders	D012431, D002392, D008715	Methionine, Catechin, Rutin
3311	Ginkgo biloba	C10.900.300	Craniocerebral Trauma	C054125	sesamin
3311	Ginkgo biloba	C12.294.565	Prostatic Diseases	D047310	Apigenin
3311	Ginkgo biloba	C12.777.419	Kidney Diseases	D012431, D008715	Methionine, Rutin
3311	Ginkgo biloba	C12.777.829	Urinary Bladder Diseases	D002392, C045856	ginkgolide B, Catechin
3311	Ginkgo biloba	C13.351.968	Urologic Diseases	D012431, D002392, D008715, C045856	ginkgolide B, Methionine, Catechin, Rutin
3311	Ginkgo biloba	C14.280.067	Arrhythmias, Cardiac	C045856	ginkgolide B
3311	Ginkgo biloba	C14.280.238	Cardiomyopathies	C006552, D047310	kaempferol, Apigenin
3311	Ginkgo biloba	C14.280.647	Myocardial Ischemia	D002392	Catechin
3311	Ginkgo biloba	C14.907.137	Arterial Occlusive Diseases	D002392, C006552	kaempferol, Catechin
3311	Ginkgo biloba	C14.907.253	Cerebrovascular Disorders	C054125	sesamin
3311	Ginkgo biloba	C14.907.514	Hypotension	C045856	ginkgolide B
3311	Ginkgo biloba	C14.907.585	Myocardial Ischemia	D002392	Catechin
3311	Ginkgo biloba	C15.378.147	Blood Protein Disorders	D012431	Rutin
3311	Ginkgo biloba	C15.378.463	Hemorrhagic Disorders	D012431	Rutin
3311	Ginkgo biloba	C17.800.090	Breast Diseases	D002392, C006552, D047310	kaempferol, Catechin, Apigenin
3311	Ginkgo biloba	C17.800.882	Skin Neoplasms	D047310	Apigenin
3311	Ginkgo biloba	C18.452.104	Bone Diseases, Metabolic	C006552	kaempferol
3311	Ginkgo biloba	C18.452.394	Glucose Metabolism Disorders	D012431, D002392, C006552	kaempferol, Catechin, Rutin
3311	Ginkgo biloba	C18.452.584	Lipid Metabolism Disorders	D012431, C025473	gamma-sitosterol, Rutin
3311	Ginkgo biloba	C18.452.660	Mitochondrial Diseases	D012431	Rutin
3311	Ginkgo biloba	C18.654.521	Malnutrition	D002392	Catechin
3311	Ginkgo biloba	C19.344.421	Pancreatic Neoplasms	D047310	Apigenin
3311	Ginkgo biloba	C20.683.780	Paraproteinemias	D012431	Rutin
3311	Ginkgo biloba	C23.300.775	Hypertrophy	D012431	Rutin
3311	Ginkgo biloba	C23.550.073	Arrhythmias, Cardiac	C045856	ginkgolide B
3311	Ginkgo biloba	C23.550.449	Hyperuricemia	D012431	Rutin
3311	Ginkgo biloba	C23.550.470	Inflammation	C047368, C054125, D008715, D047310	Apigenin, 3-methylquercetin, Methionine, sesamin
3311	Ginkgo biloba	C23.550.695	Muscle Weakness	C011164	amentoflavone
3311	Ginkgo biloba	C23.550.717	Necrosis	D012431	Rutin
3311	Ginkgo biloba	C23.550.727	Neoplastic Processes	D002392, C016527, C006552, D047310	isoquercitrin, kaempferol, Catechin, Apigenin
3311	Ginkgo biloba	C23.550.737	Nerve Degeneration	D002392, C073710, C045856, C477042	ginkgolide B, Catechin, ginkgolide A, bilobalide
3311	Ginkgo biloba	C23.888.144	Body Weight	D002392, D008715	Methionine, Catechin
3311	Ginkgo biloba	C23.888.277	Edema	C054125	sesamin
3311	Ginkgo biloba	C23.888.592	Neurologic Manifestations	C011164, C077458, D002392, C054125, D008715, D012431, C012526	amentoflavone, quercitrin, ginkgetin, Catechin, sesamin, Methionine, Rutin
3311	Ginkgo biloba	C25.100.562	Chemical and Drug Induced Liver Injury	C047368, D002392, C054125, D008715, D012431, C025473	3-methylquercetin, Catechin, gamma-sitosterol, sesamin, Methionine, Rutin
3311	Ginkgo biloba	C25.723.260	Chemical and Drug Induced Liver Injury	C047368, D002392, C054125, D008715, D012431, C025473	3-methylquercetin, Catechin, gamma-sitosterol, sesamin, Methionine, Rutin
3311	Ginkgo biloba	C25.723.705	Neurotoxicity Syndromes	D012431	Rutin
3311	Ginkgo biloba	C25.775.100	Alcohol-Related Disorders	D008715	Methionine
3311	Ginkgo biloba	C25.775.300	Cocaine-Related Disorders	D008715	Methionine
3311	Ginkgo biloba	C26.915.300	Craniocerebral Trauma	C054125	sesamin
3311	Ginkgo biloba	F03.900.300	Cocaine-Related Disorders	D008715	Methionine
49827	Glycyrrhiza glabra	C02.256.466	Herpesviridae Infections	C056493	imiquimod
49827	Glycyrrhiza glabra	C04.557.337	Leukemia	D012431, D019833	Genistein, Rutin
49827	Glycyrrhiza glabra	C04.557.450	Neoplasms, Connective and Soft Tissue	C056493, D019833	imiquimod, Genistein
49827	Glycyrrhiza glabra	C04.557.465	Neoplasms, Germ Cell and Embryonal	D012431, C056493, D019833	imiquimod, Genistein, Rutin
49827	Glycyrrhiza glabra	C04.557.470	Neoplasms, Glandular and Epithelial	D019833, C037032, D012431, C056493, C040920	imiquimod, isoliquiritigenin, Genistein, galangin, Rutin
49827	Glycyrrhiza glabra	C04.557.580	Neoplasms, Nerve Tissue	D012431, C056493, D019833	imiquimod, Genistein, Rutin
49827	Glycyrrhiza glabra	C04.557.645	Neoplasms, Vascular Tissue	C056493	imiquimod
49827	Glycyrrhiza glabra	C04.557.665	Nevi and Melanomas	D012431, C056493	imiquimod, Rutin
49827	Glycyrrhiza glabra	C04.588.180	Breast Neoplasms	C040920, D019833	isoliquiritigenin, Genistein
49827	Glycyrrhiza glabra	C04.588.274	Digestive System Neoplasms	D019695, C040920, D019833	isoliquiritigenin, Genistein, Glycyrrhizic Acid
49827	Glycyrrhiza glabra	C04.588.322	Endocrine Gland Neoplasms	D019833	Genistein
49827	Glycyrrhiza glabra	C04.588.614	Nervous System Neoplasms	C005273	naringenin
49827	Glycyrrhiza glabra	C04.588.894	Thoracic Neoplasms	D019833	Genistein
49827	Glycyrrhiza glabra	C04.588.945	Urogenital Neoplasms	C007768, C541528, D019833	licochalcone B, formononetin, Genistein
49827	Glycyrrhiza glabra	C04.697.098	Carcinogenesis	C016527	isoquercitrin
49827	Glycyrrhiza glabra	C04.697.650	Neoplasm Metastasis	C040920	isoliquiritigenin
49827	Glycyrrhiza glabra	C05.550.114	Arthritis	C488311	calycosin-7-O-glucopyranoside
49827	Glycyrrhiza glabra	C06.301.371	Gastrointestinal Neoplasms	C040920, D019833	isoliquiritigenin, Genistein
49827	Glycyrrhiza glabra	C06.301.623	Liver Neoplasms	D019695, D019833	Genistein, Glycyrrhizic Acid
49827	Glycyrrhiza glabra	C06.405.205	Gastroenteritis	D012431, C040920	isoliquiritigenin, Rutin
49827	Glycyrrhiza glabra	C06.405.249	Gastrointestinal Neoplasms	C040920, D019833	isoliquiritigenin, Genistein
49827	Glycyrrhiza glabra	C06.405.469	Intestinal Diseases	D012431, C040920, D019833	isoliquiritigenin, Genistein, Rutin
49827	Glycyrrhiza glabra	C06.405.748	Stomach Diseases	D012431	Rutin
49827	Glycyrrhiza glabra	C06.552.195	Chemical and Drug Induced Liver Injury	D019833, D012431, D019695, C040920, C005273	isoliquiritigenin, Glycyrrhizic Acid, Genistein, naringenin, Rutin
49827	Glycyrrhiza glabra	C06.552.241	Fatty Liver	D012431, D019695	Glycyrrhizic Acid, Rutin
49827	Glycyrrhiza glabra	C06.552.308	Hepatic Insufficiency	D006034, D019833	Genistein, Glycyrrhetinic Acid
49827	Glycyrrhiza glabra	C06.552.380	Hepatitis	D019695	Glycyrrhizic Acid
49827	Glycyrrhiza glabra	C06.552.630	Liver Cirrhosis	D006034, C005273, D019833	Genistein, naringenin, Glycyrrhetinic Acid
49827	Glycyrrhiza glabra	C06.552.697	Liver Neoplasms	D019695, D019833	Genistein, Glycyrrhizic Acid
49827	Glycyrrhiza glabra	C08.381.520	Lung Injury	D012431	Rutin
49827	Glycyrrhiza glabra	C10.228.140	Brain Diseases	C040920, D006034, C005273	isoliquiritigenin, naringenin, Glycyrrhetinic Acid
49827	Glycyrrhiza glabra	C10.228.662	Movement Disorders	D012431, D006034	Glycyrrhetinic Acid, Rutin
49827	Glycyrrhiza glabra	C10.551.240	Central Nervous System Neoplasms	C005273	naringenin
49827	Glycyrrhiza glabra	C10.597.350	Dyskinesias	D012431, C058895	1-(2-methoxyphenyl)-4-(4-(2-phthalimido)butyl)piperazine, Rutin
49827	Glycyrrhiza glabra	C10.597.606	Neurobehavioral Manifestations	C107601, C058895, C005273, D019833	1-(2-methoxyphenyl)-4-(4-(2-phthalimido)butyl)piperazine, Genistein, naringenin, glabridin
49827	Glycyrrhiza glabra	C10.597.751	Sensation Disorders	D012431, C037032	galangin, Rutin
49827	Glycyrrhiza glabra	C12.294.260	Genital Neoplasms, Male	D019833	Genistein
49827	Glycyrrhiza glabra	C12.294.565	Prostatic Diseases	D019833	Genistein
49827	Glycyrrhiza glabra	C12.758.409	Genital Neoplasms, Male	D019833	Genistein
49827	Glycyrrhiza glabra	C12.777.419	Kidney Diseases	D012431, C007768, D019695, C005273	formononetin, Glycyrrhizic Acid, naringenin, Rutin
49827	Glycyrrhiza glabra	C13.351.500	Genital Diseases, Female	C007768, D019833	formononetin, Genistein
49827	Glycyrrhiza glabra	C13.351.968	Urologic Diseases	C007768, D012431, D019695, C541528, C005273	licochalcone B, Glycyrrhizic Acid, formononetin, naringenin, Rutin
49827	Glycyrrhiza glabra	C14.280.647	Myocardial Ischemia	D019833	Genistein
49827	Glycyrrhiza glabra	C14.907.137	Arterial Occlusive Diseases	C005273	naringenin
49827	Glycyrrhiza glabra	C14.907.585	Myocardial Ischemia	D019833	Genistein
49827	Glycyrrhiza glabra	C17.800.090	Breast Diseases	C040920, D019833	isoliquiritigenin, Genistein
49827	Glycyrrhiza glabra	C17.800.174	Dermatitis	D019695	Glycyrrhizic Acid
49827	Glycyrrhiza glabra	C17.800.815	Skin Diseases, Eczematous	D019695	Glycyrrhizic Acid
49827	Glycyrrhiza glabra	C18.452.394	Glucose Metabolism Disorders	D012431, D019833, C037032, C005273	Genistein, galangin, naringenin, Rutin
49827	Glycyrrhiza glabra	C18.452.584	Lipid Metabolism Disorders	D012431, C005273, C037032	galangin, naringenin, Rutin
49827	Glycyrrhiza glabra	C18.654.726	Overnutrition	C107601, C005273	naringenin, glabridin
49827	Glycyrrhiza glabra	C19.391.630	Ovarian Diseases	D019833	Genistein
49827	Glycyrrhiza glabra	C20.543.480	Hypersensitivity, Immediate	C037032	galangin
49827	Glycyrrhiza glabra	C23.550.382	Granuloma	C056493	imiquimod
49827	Glycyrrhiza glabra	C23.550.414	Hemorrhage	D006034	Glycyrrhetinic Acid
49827	Glycyrrhiza glabra	C23.550.470	Inflammation	D019833, C083295, C541528, C037032	galangin, Genistein, prunetin, licochalcone B
49827	Glycyrrhiza glabra	C23.550.717	Necrosis	D019695, D012431, C005273, D019833	Genistein, Glycyrrhizic Acid, naringenin, Rutin
49827	Glycyrrhiza glabra	C23.550.727	Neoplastic Processes	C040920, C005273, D019833, C016527	isoliquiritigenin, isoquercitrin, naringenin, Genistein
49827	Glycyrrhiza glabra	C23.888.144	Body Weight	C107601, C005273, D019833	Genistein, naringenin, glabridin
49827	Glycyrrhiza glabra	C23.888.277	Edema	D019833	Genistein
49827	Glycyrrhiza glabra	C23.888.592	Neurologic Manifestations	C037032, D019833, C107601, D012431, C058895, C040920, C005273, C083152, D006034, C515155	isoliquiritigenin, liquiritigenin, Glycyrrhetinic Acid, glabridin, glycycoumarin, 1-(2-methoxyphenyl)-4-(4-(2-phthalimido)butyl)piperazine, Genistein, galangin, naringenin, Rutin
49827	Glycyrrhiza glabra	C23.888.821	Signs and Symptoms, Digestive	C401293	licoricidin
49827	Glycyrrhiza glabra	C25.100.562	Chemical and Drug Induced Liver Injury	D019833, D012431, D019695, C040920, C005273	isoliquiritigenin, Glycyrrhizic Acid, Genistein, naringenin, Rutin
49827	Glycyrrhiza glabra	C25.723.260	Chemical and Drug Induced Liver Injury	D019833, D012431, D019695, C040920, C005273	isoliquiritigenin, Glycyrrhizic Acid, Genistein, naringenin, Rutin
49827	Glycyrrhiza glabra	F03.615.200	Amnesia	C107601, C058895, C005273	1-(2-methoxyphenyl)-4-(4-(2-phthalimido)butyl)piperazine, naringenin, glabridin
49827	Glycyrrhiza glabra	F03.615.400	Dementia	D006034	Glycyrrhetinic Acid
182084	Gynostemma pentaphyllum	C04.557.470	Neoplasms, Glandular and Epithelial	D012431	Rutin
182084	Gynostemma pentaphyllum	C06.552.195	Chemical and Drug Induced Liver Injury	D012431	Rutin
182084	Gynostemma pentaphyllum	C06.552.241	Fatty Liver	D012431	Rutin
182084	Gynostemma pentaphyllum	C10.228.140	Brain Diseases	C442759	ginsenoside Rb1
182084	Gynostemma pentaphyllum	C10.228.662	Movement Disorders	D012431	Rutin
182084	Gynostemma pentaphyllum	C14.907.725	Reperfusion Injury	C442759	ginsenoside Rb1
182084	Gynostemma pentaphyllum	C18.452.394	Glucose Metabolism Disorders	D012431, C442759	ginsenoside Rb1, Rutin
182084	Gynostemma pentaphyllum	C18.452.584	Lipid Metabolism Disorders	D012431	Rutin
182084	Gynostemma pentaphyllum	C23.550.767	Postoperative Complications	C442759	ginsenoside Rb1
182084	Gynostemma pentaphyllum	C25.100.562	Chemical and Drug Induced Liver Injury	D012431	Rutin
182084	Gynostemma pentaphyllum	C25.723.260	Chemical and Drug Induced Liver Injury	D012431	Rutin
4232	Helianthus annuus	C04.557.465	Neoplasms, Germ Cell and Embryonal	D019833, C040048, D002726, C056493, C004541	imiquimod, Chlorogenic Acid, Genistein, caffeic acid, biochanin A
4232	Helianthus annuus	C04.557.580	Neoplasms, Nerve Tissue	D019833, C040048, D002726, C056493, C004541	imiquimod, Chlorogenic Acid, Genistein, caffeic acid, biochanin A
4232	Helianthus annuus	C04.557.665	Nevi and Melanomas	C056493, C040048, D002726	imiquimod, caffeic acid, Chlorogenic Acid
4232	Helianthus annuus	C04.588.180	Breast Neoplasms	C023623, D019833	Genistein, brassinolide
4232	Helianthus annuus	C04.588.894	Thoracic Neoplasms	D019833	Genistein
4232	Helianthus annuus	C04.697.098	Carcinogenesis	C000596494, C032005	fumaric acid, cyanidin 3-O-glucopyranoside
4232	Helianthus annuus	C06.552.195	Chemical and Drug Induced Liver Injury	C040048, D002726, D019833, D014975	Lutein, caffeic acid, Genistein, Chlorogenic Acid
4232	Helianthus annuus	C08.381.540	Lung Neoplasms	D019833	Genistein
4232	Helianthus annuus	C08.785.520	Lung Neoplasms	D019833	Genistein
4232	Helianthus annuus	C10.228.140	Brain Diseases	C040048	caffeic acid
4232	Helianthus annuus	C10.597.606	Neurobehavioral Manifestations	D019833, C004742, C040048, D002726, C058895, D015026	Genistein, Chlorogenic Acid, 1-(2-methoxyphenyl)-4-(4-(2-phthalimido)butyl)piperazine, Zeatin, caffeic acid, daidzein
4232	Helianthus annuus	C12.777.419	Kidney Diseases	C007768	formononetin
4232	Helianthus annuus	C13.351.968	Urologic Diseases	C007768	formononetin
4232	Helianthus annuus	C14.280.067	Arrhythmias, Cardiac	C004742	daidzein
4232	Helianthus annuus	C14.280.647	Myocardial Ischemia	C040048, D019833	Genistein, caffeic acid
4232	Helianthus annuus	C14.907.137	Arterial Occlusive Diseases	C040048	caffeic acid
4232	Helianthus annuus	C14.907.489	Hypertension	C004742	daidzein
4232	Helianthus annuus	C14.907.585	Myocardial Ischemia	C040048, D019833	Genistein, caffeic acid
4232	Helianthus annuus	C17.800.090	Breast Diseases	C023623, D019833	Genistein, brassinolide
4232	Helianthus annuus	C18.452.394	Glucose Metabolism Disorders	C004742, D019833	Genistein, daidzein
4232	Helianthus annuus	C18.452.584	Lipid Metabolism Disorders	D002726	Chlorogenic Acid
4232	Helianthus annuus	C23.550.073	Arrhythmias, Cardiac	C004742	daidzein
4232	Helianthus annuus	C23.550.470	Inflammation	C040048, D019833	Genistein, caffeic acid
4232	Helianthus annuus	C23.550.727	Neoplastic Processes	C004742, C000596494, D019833, C032005	cyanidin 3-O-glucopyranoside, fumaric acid, Genistein, daidzein
4232	Helianthus annuus	C23.888.144	Body Weight	D002726, D019833, D014975	Lutein, Genistein, Chlorogenic Acid
4232	Helianthus annuus	C23.888.277	Edema	C004742, C040048, D019833	Genistein, caffeic acid, daidzein
4232	Helianthus annuus	C23.888.592	Neurologic Manifestations	D019833, C004742, C040048, D002726, C058895, D015026	Zeatin, Chlorogenic Acid, 1-(2-methoxyphenyl)-4-(4-(2-phthalimido)butyl)piperazine, Genistein, caffeic acid, daidzein
4232	Helianthus annuus	C25.100.562	Chemical and Drug Induced Liver Injury	C040048, D002726, D019833, D014975	Chlorogenic Acid, Lutein, caffeic acid, Genistein
4232	Helianthus annuus	C25.723.260	Chemical and Drug Induced Liver Injury	C040048, D002726, D019833, D014975	Lutein, Genistein, caffeic acid, Chlorogenic Acid
4232	Helianthus annuus	F03.625.562	Learning Disorders	C040048	caffeic acid
183260	Hibiscus sabdariffa	C04.557.337	Leukemia	D011794	Quercetin
183260	Hibiscus sabdariffa	C04.557.465	Neoplasms, Germ Cell and Embryonal	D011794, C040015, D005054	Quercetin, myricetin, Eugenol
183260	Hibiscus sabdariffa	C04.557.580	Neoplasms, Nerve Tissue	C040015, D011794, D005054	Quercetin, myricetin, Eugenol
183260	Hibiscus sabdariffa	C04.557.665	Nevi and Melanomas	D005054	Eugenol
183260	Hibiscus sabdariffa	C06.552.195	Chemical and Drug Induced Liver Injury	D011794, D005054	Quercetin, Eugenol
183260	Hibiscus sabdariffa	C08.381.495	Lung Diseases, Obstructive	D011794	Quercetin
183260	Hibiscus sabdariffa	C10.228.140	Brain Diseases	D011794, D005054	Quercetin, Eugenol
183260	Hibiscus sabdariffa	C12.777.419	Kidney Diseases	C040015, D011794	Quercetin, myricetin
183260	Hibiscus sabdariffa	C13.351.968	Urologic Diseases	C040015, D011794	Quercetin, myricetin
183260	Hibiscus sabdariffa	C14.907.137	Arterial Occlusive Diseases	D011794, C059922	Quercetin, gossypetin
183260	Hibiscus sabdariffa	C14.907.489	Hypertension	D011794	Quercetin
183260	Hibiscus sabdariffa	C18.452.394	Glucose Metabolism Disorders	D011794	Quercetin
183260	Hibiscus sabdariffa	C18.452.584	Lipid Metabolism Disorders	D011794, C059922	Quercetin, gossypetin
183260	Hibiscus sabdariffa	C18.654.726	Overnutrition	D011794	Quercetin
183260	Hibiscus sabdariffa	C20.543.480	Hypersensitivity, Immediate	D011794, D005054	Quercetin, Eugenol
183260	Hibiscus sabdariffa	C23.550.470	Inflammation	D011794, D005054	Quercetin, Eugenol
183260	Hibiscus sabdariffa	C23.888.144	Body Weight	D011794	Quercetin
183260	Hibiscus sabdariffa	C23.888.821	Signs and Symptoms, Digestive	D011794	Quercetin
183260	Hibiscus sabdariffa	C23.888.852	Signs and Symptoms, Respiratory	D011794	Quercetin
183260	Hibiscus sabdariffa	C25.100.562	Chemical and Drug Induced Liver Injury	D011794, D005054	Quercetin, Eugenol
183260	Hibiscus sabdariffa	C25.723.260	Chemical and Drug Induced Liver Injury	D011794, D005054	Quercetin, Eugenol
16752	Houttuynia cordata	C04.588.274	Digestive System Neoplasms	C008281	limonene
16752	Houttuynia cordata	C06.405.469	Intestinal Diseases	D012431, C008574, C008281	beta-myrcene, limonene, Rutin
16752	Houttuynia cordata	C06.552.195	Chemical and Drug Induced Liver Injury	D012431, D002726, C054125, C021304	Rutin, Chlorogenic Acid, hyperoside, sesamin
16752	Houttuynia cordata	C12.777.419	Kidney Diseases	D012431	Rutin
16752	Houttuynia cordata	C13.351.968	Urologic Diseases	D012431	Rutin
16752	Houttuynia cordata	C18.452.394	Glucose Metabolism Disorders	D012431, C024714	caryophyllene, Rutin
16752	Houttuynia cordata	C23.550.470	Inflammation	C073316, C054125	carvacrol, sesamin
16752	Houttuynia cordata	C23.888.144	Body Weight	D002726, C024714	Chlorogenic Acid, caryophyllene
16752	Houttuynia cordata	C23.888.277	Edema	C054125	sesamin
16752	Houttuynia cordata	C25.100.562	Chemical and Drug Induced Liver Injury	D012431, C054125, C021304, D002726	sesamin, Chlorogenic Acid, hyperoside, Rutin
16752	Houttuynia cordata	C25.723.260	Chemical and Drug Induced Liver Injury	D012431, C054125, C021304, D002726	Rutin, Chlorogenic Acid, hyperoside, sesamin
39324	Hyssopus officinalis	C08.381.495	Lung Diseases, Obstructive	D011794	Quercetin
39324	Hyssopus officinalis	C18.452.394	Glucose Metabolism Disorders	D011794, C005273, D005707	Quercetin, naringenin, Gallic Acid
39324	Hyssopus officinalis	C20.543.480	Hypersensitivity, Immediate	D011794	Quercetin
39324	Hyssopus officinalis	C25.723.705	Neurotoxicity Syndromes	D011794	Quercetin
124778	Illicium verum	C01.539.757	Sepsis	C073316, D011794	Quercetin, carvacrol
124778	Illicium verum	C08.381.495	Lung Diseases, Obstructive	D011794	Quercetin
124778	Illicium verum	C20.543.480	Hypersensitivity, Immediate	D011794, D005054	Quercetin, Eugenol
124778	Illicium verum	C23.550.470	Inflammation	C041376, C040048, C073316, D011794, D005054, C006578	carvacrol, anethole, rosmarinic acid, Quercetin, caffeic acid, Eugenol
124778	Illicium verum	C23.888.821	Signs and Symptoms, Digestive	D011794	Quercetin
124778	Illicium verum	C25.723.705	Neurotoxicity Syndromes	D011794, C018381	salvin, Quercetin
58039	Juniperus communis	C04.557.450	Neoplasms, Connective and Soft Tissue	C056493	imiquimod
58039	Juniperus communis	C23.888.592	Neurologic Manifestations	C012526, C058895	quercitrin, 1-(2-methoxyphenyl)-4-(4-(2-phthalimido)butyl)piperazine
97750	Kaempferia galanga	C04.697.098	Carcinogenesis	C006552	kaempferol
97750	Kaempferia galanga	C18.452.394	Glucose Metabolism Disorders	C006552	kaempferol
97750	Kaempferia galanga	C23.550.727	Neoplastic Processes	C006552	kaempferol
85223	Laurus nobilis	C04.557.470	Neoplasms, Glandular and Epithelial	D011794, C018381, C006578	salvin, Quercetin, anethole
85223	Laurus nobilis	C04.588.274	Digestive System Neoplasms	D002392, D005054, C008661, D011794, C007836	geraniol, Catechin, Quercetin, nobiletin, Eugenol
85223	Laurus nobilis	C06.301.371	Gastrointestinal Neoplasms	D011794, C007836, D005054, C008661	Quercetin, nobiletin, geraniol, Eugenol
85223	Laurus nobilis	C06.405.249	Gastrointestinal Neoplasms	D011794, D005054, C007836, C008661	Quercetin, nobiletin, geraniol, Eugenol
85223	Laurus nobilis	C06.405.469	Intestinal Diseases	D005707, C008661, D011794, C083030, C002602, D005054, C007836, C006578	dehydrocostus lactone, anethole, geraniol, Gallic Acid, costunolide, Quercetin, nobiletin, Eugenol
85223	Laurus nobilis	C17.800.838	Skin Diseases, Infectious	D013943	Thymol
85223	Laurus nobilis	C18.452.394	Glucose Metabolism Disorders	C002601, D002392, C059006, C479580, C006552, D005707, D011794, C002602	eremanthin, Catechin, Gallic Acid, costunolide, kaempferol, procyanidin B2, Quercetin, tangeretin
85223	Laurus nobilis	C23.888.821	Signs and Symptoms, Digestive	D011794	Quercetin
4006	Linum usitatissimum	C10.228.140	Brain Diseases	C054125, D017962	alpha-Linolenic Acid, sesamin
4006	Linum usitatissimum	C10.597.350	Dyskinesias	C054125	sesamin
4006	Linum usitatissimum	C14.907.253	Cerebrovascular Disorders	C054125	sesamin
4006	Linum usitatissimum	C23.550.470	Inflammation	C054125, D017962	alpha-Linolenic Acid, sesamin
4006	Linum usitatissimum	C23.888.144	Body Weight	C023022, C023031	neolinustatin, linustatin
4006	Linum usitatissimum	C23.888.277	Edema	C054125, C060283, C075384	coniferaldehyde, secoisolariciresinol, sesamin
4006	Linum usitatissimum	C23.888.592	Neurologic Manifestations	C054125, D017962	alpha-Linolenic Acid, sesamin
4006	Linum usitatissimum	F03.600.300	Depressive Disorder	D017962	alpha-Linolenic Acid
1986359	Lippia graveolens	C06.405.469	Intestinal Diseases	D011794	Quercetin
98504	Matricaria chamomilla	C04.588.180	Breast Neoplasms	D011794, D002392, C045651, D047310	Quercetin, epigallocatechin gallate, Catechin, Apigenin
98504	Matricaria chamomilla	C06.405.205	Gastroenteritis	D011794	Quercetin
98504	Matricaria chamomilla	C06.405.469	Intestinal Diseases	D011794, C045651, D005707, D047310	epigallocatechin gallate, Quercetin, Gallic Acid, Apigenin
98504	Matricaria chamomilla	C06.405.748	Stomach Diseases	D011794, D005707	Quercetin, Gallic Acid
98504	Matricaria chamomilla	C06.552.195	Chemical and Drug Induced Liver Injury	D002392, C040048, C005273, C045651, D011794, C056068	theaflavin, epigallocatechin gallate, Catechin, Quercetin, caffeic acid, naringenin
98504	Matricaria chamomilla	C08.618.846	Respiratory Insufficiency	D011794	Quercetin
98504	Matricaria chamomilla	C12.777.419	Kidney Diseases	D047311, C005273, C045651, D005707, D011794	epigallocatechin gallate, Luteolin, Gallic Acid, Quercetin, naringenin
98504	Matricaria chamomilla	C13.351.968	Urologic Diseases	D047311, D002392, C005273, C045651, D005707, D011794	epigallocatechin gallate, Catechin, Luteolin, Gallic Acid, Quercetin, naringenin
98504	Matricaria chamomilla	C16.320.565	Metabolism, Inborn Errors	D002392	Catechin
98504	Matricaria chamomilla	C17.800.090	Breast Diseases	D011794, D002392, C045651, D047310	Quercetin, epigallocatechin gallate, Catechin, Apigenin
98504	Matricaria chamomilla	C18.452.394	Glucose Metabolism Disorders	D002392, C005273, C045651, D005707, D011794	epigallocatechin gallate, Catechin, Gallic Acid, Quercetin, naringenin
98504	Matricaria chamomilla	C18.452.584	Lipid Metabolism Disorders	D011794, C005273, D005707	Quercetin, naringenin, Gallic Acid
98504	Matricaria chamomilla	C18.452.648	Metabolism, Inborn Errors	D002392	Catechin
98504	Matricaria chamomilla	C23.550.470	Inflammation	D047311, D047310, C040048, C045651, D011794, C056068	theaflavin, epigallocatechin gallate, Apigenin, Luteolin, Quercetin, caffeic acid
98504	Matricaria chamomilla	C23.888.821	Signs and Symptoms, Digestive	D011794	Quercetin
98504	Matricaria chamomilla	C25.100.562	Chemical and Drug Induced Liver Injury	D002392, C040048, C005273, C045651, D011794, C056068	theaflavin, epigallocatechin gallate, Catechin, Quercetin, caffeic acid, naringenin
98504	Matricaria chamomilla	C25.723.260	Chemical and Drug Induced Liver Injury	D002392, C040048, C005273, C045651, D011794, C056068	theaflavin, epigallocatechin gallate, Catechin, Quercetin, caffeic acid, naringenin
3879	Medicago sativa	C18.452.394	Glucose Metabolism Disorders	C004742, D019833, C021730	pinitol, Genistein, daidzein
3879	Medicago sativa	C19.246.240	Diabetes Mellitus, Experimental	C021730	pinitol
39338	Melissa officinalis	C04.557.337	Leukemia	D011794, D005707	Quercetin, Gallic Acid
39338	Melissa officinalis	C04.557.465	Neoplasms, Germ Cell and Embryonal	D011794, C040048, D005707, D047310	Quercetin, caffeic acid, Gallic Acid, Apigenin
39338	Melissa officinalis	C04.557.470	Neoplasms, Glandular and Epithelial	D011794, C013015, D047310	Quercetin, hesperetin, Apigenin
39338	Melissa officinalis	C04.557.580	Neoplasms, Nerve Tissue	D011794, C040048, D005707, D047310	Quercetin, caffeic acid, Gallic Acid, Apigenin
39338	Melissa officinalis	C04.557.665	Nevi and Melanomas	C040048, D005707, D047310	caffeic acid, Gallic Acid, Apigenin
39338	Melissa officinalis	C04.588.274	Digestive System Neoplasms	D011794, C013015, D047310	Quercetin, hesperetin, Apigenin
39338	Melissa officinalis	C04.588.945	Urogenital Neoplasms	D011794, D047310	Quercetin, Apigenin
39338	Melissa officinalis	C06.301.371	Gastrointestinal Neoplasms	D011794, C013015, D047310	Quercetin, hesperetin, Apigenin
39338	Melissa officinalis	C06.405.249	Gastrointestinal Neoplasms	D011794, C013015, D047310	Quercetin, hesperetin, Apigenin
39338	Melissa officinalis	C06.405.469	Intestinal Diseases	D011794, C013015, D005707, D047310	Quercetin, Gallic Acid, hesperetin, Apigenin
39338	Melissa officinalis	C06.405.748	Stomach Diseases	D011794, D005707	Quercetin, Gallic Acid
39338	Melissa officinalis	C10.228.140	Brain Diseases	D011794, C040048, C108217, C005273	citronellal, Quercetin, caffeic acid, naringenin
39338	Melissa officinalis	C10.597.350	Dyskinesias	D011794	Quercetin
39338	Melissa officinalis	C10.597.606	Neurobehavioral Manifestations	D011794, C040048, C005273	Quercetin, caffeic acid, naringenin
39338	Melissa officinalis	C12.294.260	Genital Neoplasms, Male	D011794, D047310	Quercetin, Apigenin
39338	Melissa officinalis	C12.294.565	Prostatic Diseases	D011794, D047310	Quercetin, Apigenin
39338	Melissa officinalis	C12.294.829	Testicular Diseases	D011794	Quercetin
39338	Melissa officinalis	C12.758.409	Genital Neoplasms, Male	D011794, D047310	Quercetin, Apigenin
39338	Melissa officinalis	C13.351.500	Genital Diseases, Female	D011794, D047311	Luteolin, Quercetin
39338	Melissa officinalis	C14.907.253	Cerebrovascular Disorders	D011794	Quercetin
39338	Melissa officinalis	C14.907.489	Hypertension	D011794	Quercetin
39338	Melissa officinalis	C18.452.394	Glucose Metabolism Disorders	D011794, C005273, C006552, D005707	Gallic Acid, Quercetin, naringenin, kaempferol
39338	Melissa officinalis	C18.452.584	Lipid Metabolism Disorders	D011794, C005273, D005707	Quercetin, naringenin, Gallic Acid
39338	Melissa officinalis	C18.452.660	Mitochondrial Diseases	D011794	Quercetin
39338	Melissa officinalis	C19.391.829	Testicular Diseases	D011794	Quercetin
39338	Melissa officinalis	C23.300.775	Hypertrophy	D011794, D047311	Luteolin, Quercetin
39338	Melissa officinalis	C23.888.592	Neurologic Manifestations	C013015, C108217, C040048, C005273, D011794	citronellal, Quercetin, caffeic acid, naringenin, hesperetin
39338	Melissa officinalis	F03.615.250	Cognition Disorders	D011794	Quercetin
190902	Mentha aquatica	C04.557.465	Neoplasms, Germ Cell and Embryonal	D047310	Apigenin
190902	Mentha aquatica	C04.557.580	Neoplasms, Nerve Tissue	D047310	Apigenin
190902	Mentha aquatica	C04.557.665	Nevi and Melanomas	D047310	Apigenin
190902	Mentha aquatica	C04.588.180	Breast Neoplasms	D047310	Apigenin
190902	Mentha aquatica	C17.800.090	Breast Diseases	D047310	Apigenin
292239	Mentha arvensis	C06.405.469	Intestinal Diseases	D008610, C008281	Menthol, limonene
292239	Mentha arvensis	C06.405.748	Stomach Diseases	D008610, C008281	Menthol, limonene
29719	Mentha spicata	C04.588.274	Digestive System Neoplasms	D011794, C008281, D047310	Quercetin, limonene, Apigenin
29719	Mentha spicata	C04.588.614	Nervous System Neoplasms	C005273	naringenin
29719	Mentha spicata	C05.550.114	Arthritis	D047311, D047310	Luteolin, Apigenin
29719	Mentha spicata	C06.301.371	Gastrointestinal Neoplasms	D011794, D047310	Quercetin, Apigenin
29719	Mentha spicata	C06.405.249	Gastrointestinal Neoplasms	D011794, D047310	Quercetin, Apigenin
29719	Mentha spicata	C06.405.469	Intestinal Diseases	D011794, D005707, C008281, D047310	Quercetin, Gallic Acid, limonene, Apigenin
29719	Mentha spicata	C06.405.748	Stomach Diseases	D011794, D005707, C008281	Quercetin, Gallic Acid, limonene
29719	Mentha spicata	C06.552.195	Chemical and Drug Induced Liver Injury	D011794, C040048, C005273	Quercetin, caffeic acid, naringenin
29719	Mentha spicata	C08.381.495	Lung Diseases, Obstructive	D011794	Quercetin
29719	Mentha spicata	C08.381.520	Lung Injury	D011794, C041376	Quercetin, rosmarinic acid
29719	Mentha spicata	C10.228.140	Brain Diseases	D011794, C040048, C005273	Quercetin, caffeic acid, naringenin
29719	Mentha spicata	C10.551.240	Central Nervous System Neoplasms	C005273	naringenin
29719	Mentha spicata	C13.351.500	Genital Diseases, Female	D011794, D047311	Luteolin, Quercetin
29719	Mentha spicata	C19.391.630	Ovarian Diseases	D011794, D047311	Luteolin, Quercetin
29719	Mentha spicata	C23.550.470	Inflammation	C041376, D047311, D047310, C040048, D011794	rosmarinic acid, Apigenin, Luteolin, Quercetin, caffeic acid
29719	Mentha spicata	C23.888.821	Signs and Symptoms, Digestive	D011794	Quercetin
29719	Mentha spicata	C25.100.562	Chemical and Drug Induced Liver Injury	D011794, C040048, C005273	Quercetin, caffeic acid, naringenin
29719	Mentha spicata	C25.723.260	Chemical and Drug Induced Liver Injury	D011794, C040048, C005273	Quercetin, caffeic acid, naringenin
29719	Mentha spicata	C26.891.554	Lung Injury	D011794, C041376	Quercetin, rosmarinic acid
34256	Mentha x piperita	C04.557.665	Nevi and Melanomas	C045651, D047310	epigallocatechin gallate, Apigenin
34256	Mentha x piperita	C04.588.274	Digestive System Neoplasms	D004145, D047310, D002392, C045651, C056068	theaflavin, epigallocatechin gallate, Catechin, Apigenin, Diosmin
34256	Mentha x piperita	C05.550.114	Arthritis	D047310	Apigenin
34256	Mentha x piperita	C06.301.371	Gastrointestinal Neoplasms	C045651, D047310	epigallocatechin gallate, Apigenin
34256	Mentha x piperita	C06.405.249	Gastrointestinal Neoplasms	C045651, D047310	epigallocatechin gallate, Apigenin
34256	Mentha x piperita	C06.405.469	Intestinal Diseases	D008610, C045651, D047310	Menthol, epigallocatechin gallate, Apigenin
34256	Mentha x piperita	C06.405.748	Stomach Diseases	D008610	Menthol
34256	Mentha x piperita	C08.381.495	Lung Diseases, Obstructive	C045651	epigallocatechin gallate
34256	Mentha x piperita	C10.597.617	Pain	D008610	Menthol
34256	Mentha x piperita	C18.452.394	Glucose Metabolism Disorders	D002392, D004145, C045651	Diosmin, epigallocatechin gallate, Catechin
34256	Mentha x piperita	C20.543.480	Hypersensitivity, Immediate	C045651	epigallocatechin gallate
34256	Mentha x piperita	C23.550.414	Hemorrhage	C045651	epigallocatechin gallate
34256	Mentha x piperita	C23.550.470	Inflammation	C041376, C056068, C045651, D047310	theaflavin, epigallocatechin gallate, rosmarinic acid, Apigenin
34256	Mentha x piperita	C23.550.767	Postoperative Complications	C041376	rosmarinic acid
34256	Mentha x piperita	C23.888.277	Edema	C045651	epigallocatechin gallate
34256	Mentha x piperita	C23.888.592	Neurologic Manifestations	D002392, D008610, C045651	Menthol, epigallocatechin gallate, Catechin
159030	Murraya koenigii	C04.557.465	Neoplasms, Germ Cell and Embryonal	D003474	Curcumin
159030	Murraya koenigii	C04.557.580	Neoplasms, Nerve Tissue	D003474	Curcumin
159030	Murraya koenigii	C04.557.665	Nevi and Melanomas	D003474	Curcumin
159030	Murraya koenigii	C04.588.180	Breast Neoplasms	D003474	Curcumin
159030	Murraya koenigii	C06.552.195	Chemical and Drug Induced Liver Injury	D003474	Curcumin
159030	Murraya koenigii	C08.381.495	Lung Diseases, Obstructive	D003474	Curcumin
159030	Murraya koenigii	C10.228.140	Brain Diseases	D003474	Curcumin
159030	Murraya koenigii	C10.228.662	Movement Disorders	D003474	Curcumin
159030	Murraya koenigii	C10.574.945	Tauopathies	D003474	Curcumin
159030	Murraya koenigii	C14.280.647	Myocardial Ischemia	D003474	Curcumin
159030	Murraya koenigii	C14.907.489	Hypertension	D003474	Curcumin
159030	Murraya koenigii	C14.907.585	Myocardial Ischemia	D003474	Curcumin
159030	Murraya koenigii	C17.800.090	Breast Diseases	D003474	Curcumin
159030	Murraya koenigii	C18.452.394	Glucose Metabolism Disorders	D003474	Curcumin
159030	Murraya koenigii	C18.654.726	Overnutrition	D003474	Curcumin
159030	Murraya koenigii	C23.550.470	Inflammation	D003474	Curcumin
159030	Murraya koenigii	C23.888.144	Body Weight	D003474	Curcumin
159030	Murraya koenigii	C23.888.592	Neurologic Manifestations	D003474	Curcumin
159030	Murraya koenigii	C23.888.821	Signs and Symptoms, Digestive	D003474	Curcumin
159030	Murraya koenigii	C25.100.562	Chemical and Drug Induced Liver Injury	D003474	Curcumin
159030	Murraya koenigii	C25.723.260	Chemical and Drug Induced Liver Injury	D003474	Curcumin
159030	Murraya koenigii	C25.723.705	Neurotoxicity Syndromes	D003474	Curcumin
159030	Murraya koenigii	F03.615.400	Dementia	D003474	Curcumin
51089	Myristica fragrans	C04.557.337	Leukemia	D011794, D005707	Quercetin, Gallic Acid
51089	Myristica fragrans	C04.588.180	Breast Neoplasms	D011794, D002392, D005054, C006552	kaempferol, Quercetin, Eugenol, Catechin
51089	Myristica fragrans	C04.588.274	Digestive System Neoplasms	D011794, D002392, D005054	Quercetin, Eugenol, Catechin
51089	Myristica fragrans	C04.697.098	Carcinogenesis	D011794, D002392, C006552	Quercetin, kaempferol, Catechin
51089	Myristica fragrans	C06.301.371	Gastrointestinal Neoplasms	D011794, D005054	Quercetin, Eugenol
51089	Myristica fragrans	C06.405.205	Gastroenteritis	D011794	Quercetin
51089	Myristica fragrans	C06.405.249	Gastrointestinal Neoplasms	D011794, D005054	Quercetin, Eugenol
51089	Myristica fragrans	C06.405.469	Intestinal Diseases	D011794, C006578, D005054, D005707	Gallic Acid, Quercetin, Eugenol, anethole
51089	Myristica fragrans	C06.405.748	Stomach Diseases	D011794, D005707, D005054, C006578	Gallic Acid, Quercetin, Eugenol, anethole
51089	Myristica fragrans	C06.552.195	Chemical and Drug Induced Liver Injury	D011794, D002392, C040048, D005054	Quercetin, caffeic acid, Eugenol, Catechin
51089	Myristica fragrans	C10.228.140	Brain Diseases	D011794, C040048, D005054	Quercetin, caffeic acid, Eugenol
51089	Myristica fragrans	C10.597.617	Pain	C073316, D011794, D005054	Quercetin, Eugenol, carvacrol
51089	Myristica fragrans	C10.597.751	Sensation Disorders	D002392, C073316, D005054, D011794, D020156	carvacrol, Catechin, Salicylic Acid, Quercetin, Eugenol
51089	Myristica fragrans	C12.294.644	Sexual Dysfunction, Physiological	D011794	Quercetin
51089	Myristica fragrans	C12.777.419	Kidney Diseases	D011794, C005246, D005707	Quercetin, Gallic Acid, myristicin
51089	Myristica fragrans	C13.351.500	Genital Diseases, Female	D011794, D005054	Quercetin, Eugenol
51089	Myristica fragrans	C13.351.968	Urologic Diseases	D011794, C005246, D002392, D005707	Quercetin, Catechin, Gallic Acid, myristicin
51089	Myristica fragrans	C17.800.090	Breast Diseases	D011794, D002392, D005054, C006552	kaempferol, Quercetin, Eugenol, Catechin
51089	Myristica fragrans	C18.452.394	Glucose Metabolism Disorders	D011794, D002392, C006552, D005707	kaempferol, Quercetin, Gallic Acid, Catechin
51089	Myristica fragrans	C18.654.726	Overnutrition	D011794	Quercetin
51089	Myristica fragrans	C23.550.355	Fibrosis	D011794, D005707	Quercetin, Gallic Acid
51089	Myristica fragrans	C23.550.727	Neoplastic Processes	D002392, C006552, D005707, D011794, D005054, C006578	anethole, Catechin, kaempferol, Gallic Acid, Quercetin, Eugenol
51089	Myristica fragrans	C23.888.144	Body Weight	D011794, D002392	Quercetin, Catechin
51089	Myristica fragrans	C23.888.277	Edema	D011794, D013943, C040048, C007633	Thymol, Quercetin, caffeic acid, estragole
51089	Myristica fragrans	C23.888.592	Neurologic Manifestations	D002392, C040048, C073316, D005054, D011794, C018381, D020156, C006578	anethole, carvacrol, Catechin, Salicylic Acid, salvin, Quercetin, caffeic acid, Eugenol
51089	Myristica fragrans	C23.888.821	Signs and Symptoms, Digestive	D011794	Quercetin
51089	Myristica fragrans	C25.100.562	Chemical and Drug Induced Liver Injury	D011794, D002392, C040048, D005054	Quercetin, caffeic acid, Eugenol, Catechin
51089	Myristica fragrans	C25.723.260	Chemical and Drug Induced Liver Injury	D011794, D002392, C040048, D005054	Quercetin, caffeic acid, Eugenol, Catechin
65948	Nasturtium officinale	C03.335.865	Trematode Infections	D011794	Quercetin
65948	Nasturtium officinale	C04.557.470	Neoplasms, Glandular and Epithelial	D011794, C013015, D047310	Quercetin, hesperetin, Apigenin
65948	Nasturtium officinale	C04.588.894	Thoracic Neoplasms	D011794	Quercetin
65948	Nasturtium officinale	C04.588.945	Urogenital Neoplasms	D011794, D047310	Quercetin, Apigenin
65948	Nasturtium officinale	C04.697.098	Carcinogenesis	D011794, C006552, D047311	Luteolin, Quercetin, kaempferol
65948	Nasturtium officinale	C08.381.540	Lung Neoplasms	D011794	Quercetin
65948	Nasturtium officinale	C08.785.520	Lung Neoplasms	D011794	Quercetin
65948	Nasturtium officinale	C12.294.260	Genital Neoplasms, Male	D011794, D047310	Quercetin, Apigenin
65948	Nasturtium officinale	C12.294.565	Prostatic Diseases	D011794, D047310	Quercetin, Apigenin
65948	Nasturtium officinale	C12.758.409	Genital Neoplasms, Male	D011794, D047310	Quercetin, Apigenin
65948	Nasturtium officinale	C12.777.419	Kidney Diseases	D011794, D047311	Luteolin, Quercetin
65948	Nasturtium officinale	C13.351.968	Urologic Diseases	D011794, D047311	Luteolin, Quercetin
65948	Nasturtium officinale	C14.907.489	Hypertension	D011794	Quercetin
65948	Nasturtium officinale	C18.452.394	Glucose Metabolism Disorders	D011794, C006552	Quercetin, kaempferol
65948	Nasturtium officinale	C18.452.584	Lipid Metabolism Disorders	D011794	Quercetin
65948	Nasturtium officinale	C23.550.470	Inflammation	D011794, C047368, D047311, D047310	Luteolin, Quercetin, 3-methylquercetin, Apigenin
65948	Nasturtium officinale	C23.550.727	Neoplastic Processes	D011794, C006552, D047311, D047310	Luteolin, Quercetin, kaempferol, Apigenin
65948	Nasturtium officinale	C23.888.277	Edema	D011794	Quercetin
39347	Nepeta cataria	C20.543.480	Hypersensitivity, Immediate	D005054	Eugenol
39347	Nepeta cataria	C23.550.470	Inflammation	D005054	Eugenol
39347	Nepeta cataria	C23.888.592	Neurologic Manifestations	D005054	Eugenol
555479	Nigella sativa	C01.703.295	Dermatomycoses	D013943	Thymol
555479	Nigella sativa	C04.557.470	Neoplasms, Glandular and Epithelial	C003466	thymoquinone
555479	Nigella sativa	C04.588.180	Breast Neoplasms	D019301	Oleic Acid
555479	Nigella sativa	C04.588.274	Digestive System Neoplasms	C003466	thymoquinone
555479	Nigella sativa	C05.550.114	Arthritis	C003466	thymoquinone
555479	Nigella sativa	C06.301.623	Liver Neoplasms	C003466	thymoquinone
555479	Nigella sativa	C06.405.469	Intestinal Diseases	C008574	beta-myrcene
555479	Nigella sativa	C06.405.748	Stomach Diseases	C008574	beta-myrcene
555479	Nigella sativa	C06.552.195	Chemical and Drug Induced Liver Injury	C003466, D017962, C007078	alpha-Linolenic Acid, thymoquinone, citronellol
555479	Nigella sativa	C06.552.697	Liver Neoplasms	C003466	thymoquinone
555479	Nigella sativa	C10.228.140	Brain Diseases	C006923, D017962, C007078	alpha-Linolenic Acid, carvone, citronellol
555479	Nigella sativa	C10.597.606	Neurobehavioral Manifestations	D017962	alpha-Linolenic Acid
555479	Nigella sativa	C10.597.617	Pain	C073316, C007210	4-cymene, carvacrol
555479	Nigella sativa	C10.597.742	Seizures	C006923, C007078	carvone, citronellol
555479	Nigella sativa	C12.777.419	Kidney Diseases	C005246, C003466	thymoquinone, myristicin
555479	Nigella sativa	C13.351.968	Urologic Diseases	C005246, C003466	thymoquinone, myristicin
555479	Nigella sativa	C14.907.489	Hypertension	C003466	thymoquinone
555479	Nigella sativa	C17.300.775	Rheumatic Diseases	C003466	thymoquinone
555479	Nigella sativa	C17.800.090	Breast Diseases	D019301	Oleic Acid
555479	Nigella sativa	C17.800.838	Skin Diseases, Infectious	D013943	Thymol
555479	Nigella sativa	C18.452.394	Glucose Metabolism Disorders	C003466	thymoquinone
555479	Nigella sativa	C19.246.099	Diabetes Complications	C003466	thymoquinone
555479	Nigella sativa	C19.246.240	Diabetes Mellitus, Experimental	C003466	thymoquinone
555479	Nigella sativa	C23.300.775	Hypertrophy	C003466	thymoquinone
555479	Nigella sativa	C23.550.414	Hemorrhage	C003466	thymoquinone
555479	Nigella sativa	C23.550.470	Inflammation	C073316, C003466, D017962	alpha-Linolenic Acid, thymoquinone, carvacrol
555479	Nigella sativa	C23.550.717	Necrosis	C073316, C005246, D013943	Thymol, myristicin, carvacrol
555479	Nigella sativa	C23.550.727	Neoplastic Processes	C003466	thymoquinone
555479	Nigella sativa	C23.550.891	Ulcer	D013943	Thymol
555479	Nigella sativa	C23.888.144	Body Weight	C003466, C007078	thymoquinone, citronellol
555479	Nigella sativa	C23.888.277	Edema	D013943, C007633, C007078	Thymol, estragole, citronellol
555479	Nigella sativa	C23.888.592	Neurologic Manifestations	C007210, C006923, C007078, C073316, D017962, C003466	carvone, carvacrol, thymoquinone, alpha-Linolenic Acid, citronellol, 4-cymene
555479	Nigella sativa	C25.100.562	Chemical and Drug Induced Liver Injury	C003466, D017962, C007078	alpha-Linolenic Acid, thymoquinone, citronellol
555479	Nigella sativa	C25.723.260	Chemical and Drug Induced Liver Injury	C003466, D017962, C007078	alpha-Linolenic Acid, thymoquinone, citronellol
555479	Nigella sativa	F03.600.300	Depressive Disorder	D017962	alpha-Linolenic Acid
39350	Ocimum basilicum	C01.252.400	Gram-Negative Bacterial Infections	D005054	Eugenol
39350	Ocimum basilicum	C01.252.410	Gram-Positive Bacterial Infections	D005054	Eugenol
39350	Ocimum basilicum	C04.557.470	Neoplasms, Glandular and Epithelial	D011794, C013015, D009828, D047310	Oleanolic Acid, Quercetin, hesperetin, Apigenin
39350	Ocimum basilicum	C04.588.274	Digestive System Neoplasms	D011794, C013015, D005054, D047310	Quercetin, Eugenol, hesperetin, Apigenin
39350	Ocimum basilicum	C04.697.098	Carcinogenesis	C000596494, D047311, C006552, D011794, C016527	isoquercitrin, cyanidin 3-O-glucopyranoside, Luteolin, kaempferol, Quercetin
39350	Ocimum basilicum	C04.697.650	Neoplasm Metastasis	D047310, D005707, D011794, D005054, C002070	betulinic acid, Apigenin, Gallic Acid, Quercetin, Eugenol
39350	Ocimum basilicum	C06.301.623	Liver Neoplasms	D011794	Quercetin
39350	Ocimum basilicum	C06.405.205	Gastroenteritis	D011794	Quercetin
39350	Ocimum basilicum	C06.405.469	Intestinal Diseases	C013015, D047310, D005707, D011794, D005054	Apigenin, Gallic Acid, Quercetin, Eugenol, hesperetin
39350	Ocimum basilicum	C06.405.748	Stomach Diseases	D011794, D005054, D005707	Quercetin, Gallic Acid, Eugenol
39350	Ocimum basilicum	C06.552.697	Liver Neoplasms	D011794	Quercetin
39350	Ocimum basilicum	C10.228.140	Brain Diseases	D011794, C040048, C005273, D005054	Quercetin, caffeic acid, naringenin, Eugenol
39350	Ocimum basilicum	C10.597.617	Pain	D011794, C013015, D005054	Quercetin, Eugenol, hesperetin
39350	Ocimum basilicum	C12.294.565	Prostatic Diseases	D011794, D047310	Quercetin, Apigenin
39350	Ocimum basilicum	C12.777.419	Kidney Diseases	D047311, D011794, D009828, C005273, D005707, C008324	Oleanolic Acid, Luteolin, Gallic Acid, Quercetin, naringenin, mannuronic acid
39350	Ocimum basilicum	C13.351.968	Urologic Diseases	D047311, D009828, C005273, C008324, D005707, D011794	Oleanolic Acid, Luteolin, Gallic Acid, Quercetin, naringenin, mannuronic acid
39350	Ocimum basilicum	C14.907.137	Arterial Occlusive Diseases	D011794, C040048, C005273, C006552	Quercetin, caffeic acid, naringenin, kaempferol
39350	Ocimum basilicum	C14.907.253	Cerebrovascular Disorders	D011794	Quercetin
39350	Ocimum basilicum	C14.907.489	Hypertension	D011794	Quercetin
39350	Ocimum basilicum	C17.800.090	Breast Diseases	D047310, C006552, D011794, D005054, C002070	betulinic acid, Apigenin, kaempferol, Quercetin, Eugenol
39350	Ocimum basilicum	C18.452.394	Glucose Metabolism Disorders	D009828, C005273, C006552, D005707, D011794	Oleanolic Acid, Gallic Acid, kaempferol, Quercetin, naringenin
39350	Ocimum basilicum	C18.654.726	Overnutrition	D011794, D009828, C005273	Oleanolic Acid, Quercetin, naringenin
39350	Ocimum basilicum	C23.550.470	Inflammation	C047368, C041376, D047311, D047310, C040048, D009828, D011794, D005054	Oleanolic Acid, 3-methylquercetin, rosmarinic acid, Apigenin, Luteolin, Quercetin, caffeic acid, Eugenol
39350	Ocimum basilicum	C23.550.513	Ischemia	D011794, D005707	Quercetin, Gallic Acid
39350	Ocimum basilicum	C23.550.717	Necrosis	D011794, C013015, C041376, C005273	Quercetin, naringenin, rosmarinic acid, hesperetin
39350	Ocimum basilicum	C23.550.727	Neoplastic Processes	C000596494, D047311, D047310, D009828, C005273, C006552, D005707, D011794, C016527, D005054, C002070	Oleanolic Acid, isoquercitrin, betulinic acid, cyanidin 3-O-glucopyranoside, Apigenin, Luteolin, Gallic Acid, kaempferol, Quercetin, naringenin, Eugenol
39350	Ocimum basilicum	C23.888.144	Body Weight	D011794, C013015, D009828, C005273	Quercetin, Oleanolic Acid, naringenin, hesperetin
39350	Ocimum basilicum	C23.888.277	Edema	D011794, C040048	Quercetin, caffeic acid
39350	Ocimum basilicum	C23.888.592	Neurologic Manifestations	C013015, C040048, C005273, D011794, D005054	Quercetin, caffeic acid, naringenin, Eugenol, hesperetin
39350	Ocimum basilicum	C23.888.821	Signs and Symptoms, Digestive	D011794	Quercetin
39350	Ocimum basilicum	C23.888.852	Signs and Symptoms, Respiratory	D011794	Quercetin
204149	Ocimum tenuiflorum	C04.557.470	Neoplasms, Glandular and Epithelial	D047310	Apigenin
204149	Ocimum tenuiflorum	C04.588.945	Urogenital Neoplasms	D047310	Apigenin
204149	Ocimum tenuiflorum	C05.550.114	Arthritis	D047310	Apigenin
204149	Ocimum tenuiflorum	C06.405.469	Intestinal Diseases	D047310	Apigenin
204149	Ocimum tenuiflorum	C23.550.210	Chromosome Aberrations	D047310	Apigenin
204149	Ocimum tenuiflorum	C23.550.470	Inflammation	D047310	Apigenin
204149	Ocimum tenuiflorum	C23.550.727	Neoplastic Processes	D047310	Apigenin
268884	Origanum majorana	C04.588.180	Breast Neoplasms	D011794, D002392, D005054, D047310	Quercetin, Eugenol, Catechin, Apigenin
268884	Origanum majorana	C04.697.650	Neoplasm Metastasis	D047310, D002392, D005707, D011794, D005054	Catechin, Apigenin, Gallic Acid, Quercetin, Eugenol
268884	Origanum majorana	C06.405.748	Stomach Diseases	D011794, D005054, D012431, D005707	Gallic Acid, Quercetin, Eugenol, Rutin
268884	Origanum majorana	C08.381.495	Lung Diseases, Obstructive	D011794	Quercetin
268884	Origanum majorana	C10.597.617	Pain	D011794, D005054	Quercetin, Eugenol
268884	Origanum majorana	C10.597.751	Sensation Disorders	D011794, D002392, D005054, D012431	Quercetin, Eugenol, Catechin, Rutin
268884	Origanum majorana	C13.351.500	Genital Diseases, Female	D011794, D005054, D047311	Luteolin, Quercetin, Eugenol
268884	Origanum majorana	C14.907.489	Hypertension	D011794	Quercetin
268884	Origanum majorana	C17.800.090	Breast Diseases	D011794, D002392, D005054, D047310	Quercetin, Eugenol, Catechin, Apigenin
268884	Origanum majorana	C18.452.394	Glucose Metabolism Disorders	D002392, D012431, C005273, D005707, D011794	Catechin, Gallic Acid, Quercetin, naringenin, Rutin
268884	Origanum majorana	C19.391.630	Ovarian Diseases	D011794, D047311	Luteolin, Quercetin
268884	Origanum majorana	C20.543.480	Hypersensitivity, Immediate	D011794, D005054	Quercetin, Eugenol
268884	Origanum majorana	C23.550.210	Chromosome Aberrations	D011794, D047310	Quercetin, Apigenin
268884	Origanum majorana	C23.550.727	Neoplastic Processes	D047311, D047310, D002392, C005273, D005707, D011794, D005054	Catechin, Apigenin, Luteolin, Gallic Acid, Quercetin, naringenin, Eugenol
268884	Origanum majorana	C23.888.592	Neurologic Manifestations	D002392, C040048, D012431, C005273, D011794, D005054	Catechin, Quercetin, caffeic acid, naringenin, Eugenol, Rutin
268884	Origanum majorana	C23.888.821	Signs and Symptoms, Digestive	D011794	Quercetin
39352	Origanum vulgare	C04.557.465	Neoplasms, Germ Cell and Embryonal	D011794, C040048, D005707, D047310	Quercetin, caffeic acid, Gallic Acid, Apigenin
39352	Origanum vulgare	C04.588.180	Breast Neoplasms	D011794, C006552, D047310	Quercetin, kaempferol, Apigenin
39352	Origanum vulgare	C04.588.274	Digestive System Neoplasms	D011794, C013015, D047310	Quercetin, hesperetin, Apigenin
39352	Origanum vulgare	C04.697.098	Carcinogenesis	D011794, D047311, C006552	Luteolin, Quercetin, kaempferol
39352	Origanum vulgare	C06.301.371	Gastrointestinal Neoplasms	D011794, C013015, D047310	Quercetin, hesperetin, Apigenin
39352	Origanum vulgare	C06.405.205	Gastroenteritis	D011794	Quercetin
39352	Origanum vulgare	C06.405.249	Gastrointestinal Neoplasms	D011794, C013015, D047310	Quercetin, hesperetin, Apigenin
39352	Origanum vulgare	C06.405.469	Intestinal Diseases	D011794, C013015, D005707, D047310	Quercetin, Gallic Acid, hesperetin, Apigenin
39352	Origanum vulgare	C06.405.748	Stomach Diseases	D011794, D005707	Quercetin, Gallic Acid
39352	Origanum vulgare	C06.552.195	Chemical and Drug Induced Liver Injury	C013015, C047368, C040048, D011794, C005274	3-methylquercetin, naringin, Quercetin, caffeic acid, hesperetin
39352	Origanum vulgare	C08.381.677	Pneumonia	C005274	naringin
39352	Origanum vulgare	C08.381.765	Pulmonary Fibrosis	C005274	naringin
39352	Origanum vulgare	C08.730.610	Pneumonia	C005274	naringin
39352	Origanum vulgare	C10.597.617	Pain	D011794, C013015, C073316	Quercetin, hesperetin, carvacrol
39352	Origanum vulgare	C13.351.968	Urologic Diseases	D011794, C005274, D047311, D005707	Luteolin, Quercetin, Gallic Acid, naringin
39352	Origanum vulgare	C14.907.137	Arterial Occlusive Diseases	D011794, C040048, C006552	Quercetin, caffeic acid, kaempferol
39352	Origanum vulgare	C15.604.515	Lymphoproliferative Disorders	D011794	Quercetin
39352	Origanum vulgare	C17.800.090	Breast Diseases	D011794, C006552, D047310	Quercetin, kaempferol, Apigenin
39352	Origanum vulgare	C18.452.394	Glucose Metabolism Disorders	D011794, D005707, C006552, C005274	Gallic Acid, Quercetin, kaempferol, naringin
39352	Origanum vulgare	C20.683.515	Lymphoproliferative Disorders	D011794	Quercetin
39352	Origanum vulgare	C23.550.470	Inflammation	C047368, C041376, D047311, D047310, C040048, C073316, D011794, C005274	3-methylquercetin, naringin, carvacrol, rosmarinic acid, Apigenin, Luteolin, Quercetin, caffeic acid
39352	Origanum vulgare	C23.550.727	Neoplastic Processes	D047311, D047310, C006552, D005707, D011794, C005274	naringin, Apigenin, Luteolin, Gallic Acid, kaempferol, Quercetin
39352	Origanum vulgare	C23.550.737	Nerve Degeneration	D011794, C040048	Quercetin, caffeic acid
39352	Origanum vulgare	C23.888.144	Body Weight	D011794, C013015, C005274	Quercetin, naringin, hesperetin
39352	Origanum vulgare	C23.888.277	Edema	D011794, C040048, C005274	Quercetin, caffeic acid, naringin
39352	Origanum vulgare	C23.888.592	Neurologic Manifestations	D011794, C013015, C040048, C073316	Quercetin, caffeic acid, hesperetin, carvacrol
39352	Origanum vulgare	C23.888.821	Signs and Symptoms, Digestive	D011794	Quercetin
39352	Origanum vulgare	C25.100.562	Chemical and Drug Induced Liver Injury	C013015, C047368, C040048, D011794, C005274	3-methylquercetin, naringin, Quercetin, caffeic acid, hesperetin
39352	Origanum vulgare	C25.723.260	Chemical and Drug Induced Liver Injury	C013015, C047368, C040048, D011794, C005274	3-methylquercetin, naringin, Quercetin, caffeic acid, hesperetin
3469	Papaver somniferum	C06.405.205	Gastroenteritis	D009020	Morphine
3469	Papaver somniferum	C06.405.469	Intestinal Diseases	D009020	Morphine
48386	Perilla frutescens	C04.557.337	Leukemia	C018584	linalool
48386	Perilla frutescens	C04.557.465	Neoplasms, Germ Cell and Embryonal	C040048, D005054	caffeic acid, Eugenol
48386	Perilla frutescens	C04.557.470	Neoplasms, Glandular and Epithelial	C113861, D009828, C005466	Oleanolic Acid, corosolic acid, ursolic acid
48386	Perilla frutescens	C04.557.580	Neoplasms, Nerve Tissue	C040048, D005054	caffeic acid, Eugenol
48386	Perilla frutescens	C04.697.098	Carcinogenesis	C005466	ursolic acid
48386	Perilla frutescens	C10.597.606	Neurobehavioral Manifestations	C040048, D017962, C008281	alpha-Linolenic Acid, caffeic acid, limonene
48386	Perilla frutescens	C11.510.245	Cataract	D013831	Thiamine
48386	Perilla frutescens	C20.543.480	Hypersensitivity, Immediate	D005054	Eugenol
48386	Perilla frutescens	C23.550.470	Inflammation	C041376, C005466, C040048, D009828, D017962, D005054	Oleanolic Acid, rosmarinic acid, alpha-Linolenic Acid, caffeic acid, Eugenol, ursolic acid
48386	Perilla frutescens	C23.550.727	Neoplastic Processes	D009828, D005054, C005466	Oleanolic Acid, Eugenol, ursolic acid
48386	Perilla frutescens	C23.888.592	Neurologic Manifestations	C007210, D008610, C040048, C008281, D017962, D005054, D013831	limonene, Menthol, Thiamine, alpha-Linolenic Acid, caffeic acid, Eugenol, 4-cymene
48386	Perilla frutescens	F03.600.300	Depressive Disorder	D017962	alpha-Linolenic Acid
3435	Persea americana	C04.557.337	Leukemia	D011794	Quercetin
3435	Persea americana	C04.588.180	Breast Neoplasms	D047310, D002392, C006552, C045651, D011794	epigallocatechin gallate, Catechin, Apigenin, kaempferol, Quercetin
3435	Persea americana	C04.697.098	Carcinogenesis	D047311, C040015, D002392, C006552, D011794	Catechin, Luteolin, kaempferol, Quercetin, myricetin
3435	Persea americana	C05.550.114	Arthritis	D047311, D047310	Luteolin, Apigenin
3435	Persea americana	C06.552.195	Chemical and Drug Induced Liver Injury	D011794, D002392, C045651	Quercetin, epigallocatechin gallate, Catechin
3435	Persea americana	C08.127.108	Asthma	C045651	epigallocatechin gallate
3435	Persea americana	C08.381.495	Lung Diseases, Obstructive	D011794, C045651	Quercetin, epigallocatechin gallate
3435	Persea americana	C08.674.095	Asthma	C045651	epigallocatechin gallate
3435	Persea americana	C10.228.140	Brain Diseases	D011794, D019817	Quercetin, Benzoic Acid
3435	Persea americana	C10.597.617	Pain	D011794	Quercetin
3435	Persea americana	C12.294.644	Sexual Dysfunction, Physiological	D011794	Quercetin
3435	Persea americana	C12.777.419	Kidney Diseases	D011794, C040015, D047311, C045651	Luteolin, Quercetin, myricetin, epigallocatechin gallate
3435	Persea americana	C13.351.500	Genital Diseases, Female	D011794, D047311	Luteolin, Quercetin
3435	Persea americana	C13.351.968	Urologic Diseases	D047311, C040015, D002392, C045651, D011794	epigallocatechin gallate, Catechin, Luteolin, Quercetin, myricetin
3435	Persea americana	C14.280.647	Myocardial Ischemia	D011794, D002392, C040015, C045651	Quercetin, myricetin, epigallocatechin gallate, Catechin
3435	Persea americana	C14.907.489	Hypertension	D011794, C045651	Quercetin, epigallocatechin gallate
3435	Persea americana	C14.907.585	Myocardial Ischemia	C040015, D002392, D011794, C045651	Quercetin, myricetin, epigallocatechin gallate, Catechin
3435	Persea americana	C15.604.515	Lymphoproliferative Disorders	D011794	Quercetin
3435	Persea americana	C16.320.565	Metabolism, Inborn Errors	D002392, D019817	Benzoic Acid, Catechin
3435	Persea americana	C17.300.182	Cartilage Diseases	D011794	Quercetin
3435	Persea americana	C17.800.090	Breast Diseases	D047310, D002392, C006552, C045651, D011794	epigallocatechin gallate, Catechin, Apigenin, kaempferol, Quercetin
3435	Persea americana	C18.452.394	Glucose Metabolism Disorders	D002392, C479580, C006552, C045651, D011794	epigallocatechin gallate, Catechin, kaempferol, procyanidin B2, Quercetin
3435	Persea americana	C18.452.584	Lipid Metabolism Disorders	D011794	Quercetin
3435	Persea americana	C18.452.648	Metabolism, Inborn Errors	D002392, D019817	Benzoic Acid, Catechin
3435	Persea americana	C18.654.726	Overnutrition	D011794	Quercetin
3435	Persea americana	C20.543.480	Hypersensitivity, Immediate	D011794, C045651	Quercetin, epigallocatechin gallate
3435	Persea americana	C23.550.210	Chromosome Aberrations	D011794, D047310	Quercetin, Apigenin
3435	Persea americana	C23.550.470	Inflammation	D011794, D047311, C045651, D047310	Luteolin, Quercetin, epigallocatechin gallate, Apigenin
3435	Persea americana	C23.550.727	Neoplastic Processes	D047311, D047310, C040015, D002392, C006552, C045651, D011794	epigallocatechin gallate, Catechin, Apigenin, Luteolin, kaempferol, Quercetin, myricetin
3435	Persea americana	C23.888.144	Body Weight	D011794, D002392, C045651	Quercetin, epigallocatechin gallate, Catechin
3435	Persea americana	C23.888.277	Edema	D011794, C045651	Quercetin, epigallocatechin gallate
3435	Persea americana	C23.888.592	Neurologic Manifestations	D011794, D002392, C045651	Quercetin, epigallocatechin gallate, Catechin
3435	Persea americana	C23.888.821	Signs and Symptoms, Digestive	D011794	Quercetin
3435	Persea americana	C25.100.562	Chemical and Drug Induced Liver Injury	D011794, D002392, C045651	Quercetin, epigallocatechin gallate, Catechin
3435	Persea americana	C25.723.260	Chemical and Drug Induced Liver Injury	D011794, D002392, C045651	Quercetin, epigallocatechin gallate, Catechin
4043	Petroselinum crispum	C06.405.469	Intestinal Diseases	D011794, C013015, D005707, D047310	Quercetin, Gallic Acid, hesperetin, Apigenin
4043	Petroselinum crispum	C12.777.419	Kidney Diseases	C005246, D047311, C040015, C059006, C005273, D005707, D011794, D008730	Luteolin, Methoxsalen, Quercetin, Gallic Acid, myricetin, tangeretin, naringenin, myristicin
4043	Petroselinum crispum	C13.351.968	Urologic Diseases	C005246, D047311, C040015, C059006, C005273, D005707, D011794, D008730	Methoxsalen, Quercetin, Luteolin, Gallic Acid, myricetin, tangeretin, naringenin, myristicin
4043	Petroselinum crispum	C14.907.489	Hypertension	D011794	Quercetin
4043	Petroselinum crispum	C18.452.394	Glucose Metabolism Disorders	C037032, C059006, C005273, C006552, D005707, D011794	tangeretin, Gallic Acid, kaempferol, Quercetin, galangin, naringenin
4043	Petroselinum crispum	C23.888.277	Edema	D011794, C040048	Quercetin, caffeic acid
375272	Pimenta dioica	C01.252.400	Gram-Negative Bacterial Infections	D005054	Eugenol
375272	Pimenta dioica	C01.252.410	Gram-Positive Bacterial Infections	D005054	Eugenol
375272	Pimenta dioica	C04.588.180	Breast Neoplasms	D005054	Eugenol
375272	Pimenta dioica	C04.588.945	Urogenital Neoplasms	D005054	Eugenol
375272	Pimenta dioica	C17.800.090	Breast Diseases	D005054	Eugenol
271192	Pimpinella anisum	C04.697.098	Carcinogenesis	D011794, D047311	Luteolin, Quercetin
271192	Pimpinella anisum	C05.116.198	Bone Diseases, Metabolic	D011794	Quercetin
271192	Pimpinella anisum	C06.405.469	Intestinal Diseases	D011794, C006578, D005707, D047310	Quercetin, Gallic Acid, anethole, Apigenin
271192	Pimpinella anisum	C06.405.748	Stomach Diseases	D011794, C006578, D005707	Quercetin, Gallic Acid, anethole
271192	Pimpinella anisum	C06.552.241	Fatty Liver	D011794, D005707, D005632	Quercetin, Fructose, Gallic Acid
271192	Pimpinella anisum	C10.228.140	Brain Diseases	D005990, C040048, C005273, C031927, D011794	Glycerol, hydroquinone, Quercetin, caffeic acid, naringenin
271192	Pimpinella anisum	C13.351.500	Genital Diseases, Female	D011794, D047311	Luteolin, Quercetin
271192	Pimpinella anisum	C15.378.071	Anemia	D011794	Quercetin
271192	Pimpinella anisum	C18.452.104	Bone Diseases, Metabolic	D011794	Quercetin
271192	Pimpinella anisum	C18.452.394	Glucose Metabolism Disorders	D011794, C005273, D005707	Quercetin, naringenin, Gallic Acid
271192	Pimpinella anisum	C23.550.470	Inflammation	D047311, D047310, C040048, C031927, D011794, C006578	anethole, hydroquinone, Apigenin, Luteolin, Quercetin, caffeic acid
271192	Pimpinella anisum	C23.550.727	Neoplastic Processes	D047311, D047310, C005273, D005707, D011794, C006578	anethole, Apigenin, Luteolin, Gallic Acid, Quercetin, naringenin
271192	Pimpinella anisum	C23.550.767	Postoperative Complications	D011794, D005707	Quercetin, Gallic Acid
271192	Pimpinella anisum	C23.888.144	Body Weight	D011794, C005273	Quercetin, naringenin
271192	Pimpinella anisum	C23.888.592	Neurologic Manifestations	D011794, C040048, C005273, C006578	Quercetin, caffeic acid, naringenin, anethole
271192	Pimpinella anisum	C23.888.821	Signs and Symptoms, Digestive	D011794	Quercetin
49511	Piper longum	C06.552.195	Chemical and Drug Induced Liver Injury	C054125, C008922	piperine, sesamin
49511	Piper longum	C10.228.140	Brain Diseases	C054125	sesamin
49511	Piper longum	C10.228.662	Movement Disorders	C054125	sesamin
49511	Piper longum	C23.550.470	Inflammation	C054125	sesamin
49511	Piper longum	C23.888.144	Body Weight	C008922	piperine
49511	Piper longum	C23.888.592	Neurologic Manifestations	C054125	sesamin
49511	Piper longum	C25.100.562	Chemical and Drug Induced Liver Injury	C054125, C008922	piperine, sesamin
49511	Piper longum	C25.723.260	Chemical and Drug Induced Liver Injury	C054125, C008922	piperine, sesamin
13216	Piper nigrum	C01.252.410	Gram-Positive Bacterial Infections	D005054	Eugenol
13216	Piper nigrum	C04.557.465	Neoplasms, Germ Cell and Embryonal	D011794, C040048, D005054, D005707	Quercetin, caffeic acid, Gallic Acid, Eugenol
13216	Piper nigrum	C04.557.580	Neoplasms, Nerve Tissue	D011794, C040048, D005054, D005707	Quercetin, caffeic acid, Gallic Acid, Eugenol
13216	Piper nigrum	C04.557.665	Nevi and Melanomas	C040048, D005054, D005707	Gallic Acid, caffeic acid, Eugenol
13216	Piper nigrum	C04.588.180	Breast Neoplasms	D011794, D002392, D005054, C006552	Eugenol, Quercetin, kaempferol, Catechin
13216	Piper nigrum	C04.697.098	Carcinogenesis	D011794, D002392, C006552	Quercetin, kaempferol, Catechin
13216	Piper nigrum	C06.405.469	Intestinal Diseases	D011794, D005707, D005054, C006578	Quercetin, Gallic Acid, Eugenol, anethole
13216	Piper nigrum	C08.381.495	Lung Diseases, Obstructive	D011794	Quercetin
13216	Piper nigrum	C10.228.140	Brain Diseases	D011794, C040048, D005054	Quercetin, caffeic acid, Eugenol
13216	Piper nigrum	C10.228.662	Movement Disorders	D011794, C018381, D005054, D005707	salvin, Quercetin, Gallic Acid, Eugenol
13216	Piper nigrum	C10.574.812	Parkinson Disease	D005054	Eugenol
13216	Piper nigrum	C10.597.606	Neurobehavioral Manifestations	D011794, C040048, C018381	salvin, Quercetin, caffeic acid
13216	Piper nigrum	C10.597.617	Pain	D011794, D005054, C073316	Quercetin, Eugenol, carvacrol
13216	Piper nigrum	C14.907.489	Hypertension	D011794, C008922	piperine, Quercetin
13216	Piper nigrum	C17.800.090	Breast Diseases	D011794, D002392, D005054, C006552	Eugenol, Quercetin, kaempferol, Catechin
13216	Piper nigrum	C18.452.394	Glucose Metabolism Disorders	D002392, C008922, C006552, D005707, D011794	Catechin, piperine, Gallic Acid, kaempferol, Quercetin
13216	Piper nigrum	C18.452.584	Lipid Metabolism Disorders	D011794, C025473, D005707	Quercetin, Gallic Acid, gamma-sitosterol
13216	Piper nigrum	C18.654.726	Overnutrition	D011794	Quercetin
13216	Piper nigrum	C20.543.480	Hypersensitivity, Immediate	D011794, D005054	Quercetin, Eugenol
13216	Piper nigrum	C23.550.470	Inflammation	C041376, C040048, C073316, D011794, D005054, C006578	anethole, carvacrol, rosmarinic acid, Quercetin, caffeic acid, Eugenol
13216	Piper nigrum	C23.550.727	Neoplastic Processes	D002392, C006552, D005707, D011794, D005054, C006578	anethole, Catechin, Gallic Acid, kaempferol, Quercetin, Eugenol
13216	Piper nigrum	C23.888.119	Body Temperature Changes	C008922	piperine
13216	Piper nigrum	C23.888.144	Body Weight	D011794, D002392, C008922	piperine, Quercetin, Catechin
13216	Piper nigrum	C23.888.277	Edema	D011794, D013943, C040048, C007633	Thymol, Quercetin, caffeic acid, estragole
13216	Piper nigrum	C23.888.592	Neurologic Manifestations	D002392, C040048, C073316, D011794, C018381, D005054, C006578	anethole, carvacrol, Catechin, salvin, Quercetin, caffeic acid, Eugenol
46147	Portulaca oleracea	C04.557.470	Neoplasms, Glandular and Epithelial	D011794, C040015, D047310	Quercetin, myricetin, Apigenin
46147	Portulaca oleracea	C04.588.274	Digestive System Neoplasms	D011794, D009638, D047310	Quercetin, Norepinephrine, Apigenin
46147	Portulaca oleracea	C04.588.322	Endocrine Gland Neoplasms	D011794, D047311, D047310	Luteolin, Quercetin, Apigenin
46147	Portulaca oleracea	C04.588.894	Thoracic Neoplasms	D011794	Quercetin
46147	Portulaca oleracea	C06.301.371	Gastrointestinal Neoplasms	D011794, D009638, D047310	Quercetin, Norepinephrine, Apigenin
46147	Portulaca oleracea	C06.301.623	Liver Neoplasms	D011794, D009638	Quercetin, Norepinephrine
46147	Portulaca oleracea	C06.405.205	Gastroenteritis	D011794	Quercetin
46147	Portulaca oleracea	C06.405.249	Gastrointestinal Neoplasms	D011794, D009638, D047310	Quercetin, Norepinephrine, Apigenin
46147	Portulaca oleracea	C06.405.469	Intestinal Diseases	D011794, D047310	Quercetin, Apigenin
46147	Portulaca oleracea	C06.552.195	Chemical and Drug Induced Liver Injury	D011794	Quercetin
46147	Portulaca oleracea	C06.552.630	Liver Cirrhosis	D011794, D047311	Luteolin, Quercetin
46147	Portulaca oleracea	C06.552.697	Liver Neoplasms	D011794, D009638	Quercetin, Norepinephrine
46147	Portulaca oleracea	C08.381.540	Lung Neoplasms	D011794	Quercetin
46147	Portulaca oleracea	C08.785.520	Lung Neoplasms	D011794	Quercetin
46147	Portulaca oleracea	C10.228.140	Brain Diseases	D011794, D009638	Quercetin, Norepinephrine
46147	Portulaca oleracea	C10.228.662	Movement Disorders	D011794	Quercetin
46147	Portulaca oleracea	C10.597.606	Neurobehavioral Manifestations	D011794, D009638	Quercetin, Norepinephrine
46147	Portulaca oleracea	C13.351.500	Genital Diseases, Female	D011794, D047311	Luteolin, Quercetin
46147	Portulaca oleracea	C13.351.937	Urogenital Neoplasms	D011794, D047311	Luteolin, Quercetin
46147	Portulaca oleracea	C14.907.137	Arterial Occlusive Diseases	D011794, C006552	Quercetin, kaempferol
46147	Portulaca oleracea	C18.452.394	Glucose Metabolism Disorders	D011794, C006552	Quercetin, kaempferol
46147	Portulaca oleracea	C18.654.726	Overnutrition	D011794	Quercetin
46147	Portulaca oleracea	C19.344.410	Ovarian Neoplasms	D011794, D047311	Luteolin, Quercetin
46147	Portulaca oleracea	C19.391.630	Ovarian Diseases	D011794, D047311	Luteolin, Quercetin
46147	Portulaca oleracea	C23.550.470	Inflammation	D011794, D047311, D009638, D047310	Luteolin, Quercetin, Norepinephrine, Apigenin
46147	Portulaca oleracea	C23.550.717	Necrosis	C040015, D011794	Quercetin, myricetin
46147	Portulaca oleracea	C23.888.144	Body Weight	D011794	Quercetin
46147	Portulaca oleracea	C23.888.277	Edema	D011794	Quercetin
46147	Portulaca oleracea	C23.888.592	Neurologic Manifestations	D011794, D009638	Quercetin, Norepinephrine
46147	Portulaca oleracea	C23.888.821	Signs and Symptoms, Digestive	D011794	Quercetin
46147	Portulaca oleracea	C23.888.852	Signs and Symptoms, Respiratory	D011794	Quercetin
46147	Portulaca oleracea	C23.888.942	Urological Manifestations	D011794	Quercetin
46147	Portulaca oleracea	C25.100.562	Chemical and Drug Induced Liver Injury	D011794	Quercetin
46147	Portulaca oleracea	C25.723.260	Chemical and Drug Induced Liver Injury	D011794	Quercetin
298661	Rhus coriaria	C04.697.650	Neoplasm Metastasis	D005707	Gallic Acid
298661	Rhus coriaria	C06.405.469	Intestinal Diseases	D005707	Gallic Acid
298661	Rhus coriaria	C06.405.748	Stomach Diseases	D005707	Gallic Acid
298661	Rhus coriaria	C18.452.394	Glucose Metabolism Disorders	D005707	Gallic Acid
298661	Rhus coriaria	C18.452.584	Lipid Metabolism Disorders	D005707	Gallic Acid
298661	Rhus coriaria	C23.550.727	Neoplastic Processes	D005707	Gallic Acid
37565	Ruta graveolens	C18.452.584	Lipid Metabolism Disorders	D012431, C031477	7-hydroxycoumarin, Rutin
37565	Ruta graveolens	C23.888.592	Neurologic Manifestations	D012431, D005363	Ficusin, Rutin
38868	Salvia officinalis	C04.588.945	Urogenital Neoplasms	D011794, C005274, D047310	Quercetin, naringin, Apigenin
38868	Salvia officinalis	C10.228.140	Brain Diseases	C004999, C040048, C005273, D011794, C005274	naringin, ferulic acid, Quercetin, caffeic acid, naringenin
38868	Salvia officinalis	C10.597.350	Dyskinesias	D011794, C058895, C018381, D012431	1-(2-methoxyphenyl)-4-(4-(2-phthalimido)butyl)piperazine, Quercetin, salvin, Rutin
38868	Salvia officinalis	C10.597.606	Neurobehavioral Manifestations	C040048, D002726, C058895, C005273, C008281, D011794, C018381	1-(2-methoxyphenyl)-4-(4-(2-phthalimido)butyl)piperazine, limonene, Chlorogenic Acid, salvin, Quercetin, caffeic acid, naringenin
38868	Salvia officinalis	C12.294.260	Genital Neoplasms, Male	D011794, D047310	Quercetin, Apigenin
38868	Salvia officinalis	C12.294.565	Prostatic Diseases	D011794, D047310	Quercetin, Apigenin
38868	Salvia officinalis	C12.758.409	Genital Neoplasms, Male	D011794, D047310	Quercetin, Apigenin
38868	Salvia officinalis	C12.777.419	Kidney Diseases	D047311, D012431, D009828, C005273, D005707, D011794, C005274	Oleanolic Acid, naringin, Luteolin, Gallic Acid, Quercetin, naringenin, Rutin
38868	Salvia officinalis	C13.351.968	Urologic Diseases	D047311, D012431, D009828, C005273, D005707, D011794, C005274	Oleanolic Acid, naringin, Luteolin, Gallic Acid, Quercetin, naringenin, Rutin
38868	Salvia officinalis	C17.800.838	Skin Diseases, Infectious	C056493	imiquimod
38868	Salvia officinalis	C18.452.394	Glucose Metabolism Disorders	C004999, D012431, D009828, C005273, C006552, D005707, D011794, C005274	Oleanolic Acid, naringin, ferulic acid, kaempferol, Gallic Acid, Quercetin, naringenin, Rutin
38868	Salvia officinalis	C23.550.470	Inflammation	C047368, C041376, D047311, D047310, C004999, C040048, D009828, D011794, C005274	Oleanolic Acid, 3-methylquercetin, naringin, rosmarinic acid, Apigenin, Luteolin, ferulic acid, Quercetin, caffeic acid
38868	Salvia officinalis	C23.888.592	Neurologic Manifestations	C013015, C004999, C040048, D002726, D012431, C058895, C005273, C008281, D011794, C018381	1-(2-methoxyphenyl)-4-(4-(2-phthalimido)butyl)piperazine, limonene, ferulic acid, Chlorogenic Acid, salvin, Quercetin, caffeic acid, naringenin, hesperetin, Rutin
38868	Salvia officinalis	F03.615.250	Cognition Disorders	D011794	Quercetin
39367	Salvia rosmarinus	C04.557.337	Leukemia	D011794, D012431, D005707	Quercetin, Gallic Acid, Rutin
39367	Salvia rosmarinus	C04.557.465	Neoplasms, Germ Cell and Embryonal	D047310, C040048, D012431, D005707, D011794	Apigenin, Gallic Acid, Quercetin, caffeic acid, Rutin
39367	Salvia rosmarinus	C04.557.470	Neoplasms, Glandular and Epithelial	C013015, D047310, D012431, D011794, C018381	Apigenin, salvin, Quercetin, hesperetin, Rutin
39367	Salvia rosmarinus	C04.557.580	Neoplasms, Nerve Tissue	D047310, C040048, D012431, D005707, D011794	Apigenin, Gallic Acid, Quercetin, caffeic acid, Rutin
39367	Salvia rosmarinus	C04.557.665	Nevi and Melanomas	D012431, C040048, D005707, D047310	Rutin, caffeic acid, Gallic Acid, Apigenin
39367	Salvia rosmarinus	C04.588.180	Breast Neoplasms	D011794, D002392, C006552, D047310	Quercetin, kaempferol, Catechin, Apigenin
39367	Salvia rosmarinus	C04.588.274	Digestive System Neoplasms	D011794, C013015, D002392, D047310	Quercetin, Catechin, hesperetin, Apigenin
39367	Salvia rosmarinus	C04.588.322	Endocrine Gland Neoplasms	D011794, D047311, D047310	Luteolin, Quercetin, Apigenin
39367	Salvia rosmarinus	C04.588.894	Thoracic Neoplasms	D011794	Quercetin
39367	Salvia rosmarinus	C04.697.098	Carcinogenesis	D011794, C006552, D047311, D002392	Luteolin, Quercetin, kaempferol, Catechin
39367	Salvia rosmarinus	C04.697.650	Neoplasm Metastasis	D011794, D002392, D005707, D047310	Quercetin, Gallic Acid, Catechin, Apigenin
39367	Salvia rosmarinus	C06.301.371	Gastrointestinal Neoplasms	D011794, C013015, D047310	Quercetin, hesperetin, Apigenin
39367	Salvia rosmarinus	C06.301.623	Liver Neoplasms	D011794, D002392	Quercetin, Catechin
39367	Salvia rosmarinus	C06.301.761	Pancreatic Neoplasms	D011794, D047310	Quercetin, Apigenin
39367	Salvia rosmarinus	C06.405.249	Gastrointestinal Neoplasms	D011794, C013015, D047310	Quercetin, hesperetin, Apigenin
39367	Salvia rosmarinus	C06.405.469	Intestinal Diseases	C013015, D047310, D012431, D005707, D011794	Apigenin, Gallic Acid, Quercetin, hesperetin, Rutin
39367	Salvia rosmarinus	C06.552.195	Chemical and Drug Induced Liver Injury	C013015, C047368, D002392, C040048, D012431, C005273, D011794, C005274	3-methylquercetin, naringin, Catechin, Quercetin, caffeic acid, naringenin, hesperetin, Rutin
39367	Salvia rosmarinus	C06.552.308	Hepatic Insufficiency	D002392	Catechin
39367	Salvia rosmarinus	C06.552.697	Liver Neoplasms	D011794, D002392	Quercetin, Catechin
39367	Salvia rosmarinus	C06.689.667	Pancreatic Neoplasms	D011794, D047310	Quercetin, Apigenin
39367	Salvia rosmarinus	C08.381.495	Lung Diseases, Obstructive	D011794	Quercetin
39367	Salvia rosmarinus	C08.381.540	Lung Neoplasms	D011794	Quercetin
39367	Salvia rosmarinus	C08.381.677	Pneumonia	C005274	naringin
39367	Salvia rosmarinus	C08.618.846	Respiratory Insufficiency	D011794	Quercetin
39367	Salvia rosmarinus	C08.730.610	Pneumonia	C005274	naringin
39367	Salvia rosmarinus	C08.785.520	Lung Neoplasms	D011794	Quercetin
39367	Salvia rosmarinus	C10.228.140	Brain Diseases	D011794, C040048, C005273, C005274	Quercetin, caffeic acid, naringenin, naringin
39367	Salvia rosmarinus	C10.228.662	Movement Disorders	D011794, C018381, D012431, D005707	salvin, Quercetin, Gallic Acid, Rutin
39367	Salvia rosmarinus	C10.597.617	Pain	D011794, C013015	Quercetin, hesperetin
39367	Salvia rosmarinus	C10.597.751	Sensation Disorders	D012431, C013015, D011794, D002392	Quercetin, Catechin, hesperetin, Rutin
39367	Salvia rosmarinus	C10.668.829	Peripheral Nervous System Diseases	C013015	hesperetin
39367	Salvia rosmarinus	C11.510.245	Cataract	D047311	Luteolin
39367	Salvia rosmarinus	C12.777.419	Kidney Diseases	D047311, D012431, C005273, D005707, D011794, C005274	naringin, Luteolin, Gallic Acid, Quercetin, naringenin, Rutin
39367	Salvia rosmarinus	C12.777.934	Urination Disorders	D011794	Quercetin
39367	Salvia rosmarinus	C13.351.968	Urologic Diseases	D047311, D002392, D012431, C005273, D005707, D011794, C005274	naringin, Catechin, Luteolin, Gallic Acid, Quercetin, naringenin, Rutin
39367	Salvia rosmarinus	C14.280.647	Myocardial Ischemia	C041376, D002392, C040048, D005707, D011794, C005274	naringin, Catechin, rosmarinic acid, Gallic Acid, Quercetin, caffeic acid
39367	Salvia rosmarinus	C14.907.137	Arterial Occlusive Diseases	D002392, C040048, C005273, C006552, D011794	Catechin, kaempferol, Quercetin, caffeic acid, naringenin
39367	Salvia rosmarinus	C14.907.489	Hypertension	D011794	Quercetin
39367	Salvia rosmarinus	C14.907.585	Myocardial Ischemia	C041376, D002392, C040048, D005707, D011794, C005274	naringin, rosmarinic acid, Catechin, Gallic Acid, Quercetin, caffeic acid
39367	Salvia rosmarinus	C16.320.565	Metabolism, Inborn Errors	D002392	Catechin
39367	Salvia rosmarinus	C17.800.090	Breast Diseases	D011794, D002392, C006552, D047310	Quercetin, kaempferol, Catechin, Apigenin
39367	Salvia rosmarinus	C18.452.394	Glucose Metabolism Disorders	D002392, D012431, C005273, C006552, D005707, D011794, C005274	naringin, Catechin, kaempferol, Gallic Acid, Quercetin, naringenin, Rutin
39367	Salvia rosmarinus	C18.452.584	Lipid Metabolism Disorders	D012431, C005273, D005707, D011794, C005274	naringin, Gallic Acid, Quercetin, naringenin, Rutin
39367	Salvia rosmarinus	C18.452.648	Metabolism, Inborn Errors	D002392	Catechin
39367	Salvia rosmarinus	C18.654.726	Overnutrition	D011794, C005273	Quercetin, naringenin
39367	Salvia rosmarinus	C19.344.421	Pancreatic Neoplasms	D011794, D047310	Quercetin, Apigenin
39367	Salvia rosmarinus	C20.543.480	Hypersensitivity, Immediate	D011794, C005274	Quercetin, naringin
39367	Salvia rosmarinus	C23.300.775	Hypertrophy	D011794, D012431, D047311, C005274	Luteolin, Quercetin, naringin, Rutin
39367	Salvia rosmarinus	C23.550.414	Hemorrhage	D011794	Quercetin
39367	Salvia rosmarinus	C23.550.444	Hyperplasia	D011794, C018381	salvin, Quercetin
39367	Salvia rosmarinus	C23.550.470	Inflammation	C047368, C041376, D047311, D047310, C040048, D011794, C005274	3-methylquercetin, naringin, rosmarinic acid, Apigenin, Luteolin, Quercetin, caffeic acid
39367	Salvia rosmarinus	C23.550.513	Ischemia	D011794, D005707	Quercetin, Gallic Acid
39367	Salvia rosmarinus	C23.550.717	Necrosis	C013015, C041376, D012431, C005273, D011794, C005274	naringin, rosmarinic acid, Quercetin, naringenin, hesperetin, Rutin
39367	Salvia rosmarinus	C23.550.727	Neoplastic Processes	D047311, D047310, D002392, C005273, C006552, D005707, D011794, C005274	naringin, Catechin, Apigenin, Luteolin, Gallic Acid, kaempferol, Quercetin, naringenin
39367	Salvia rosmarinus	C23.550.737	Nerve Degeneration	D011794, D002392, C040048	Quercetin, caffeic acid, Catechin
39367	Salvia rosmarinus	C23.888.144	Body Weight	C013015, D002392, C005273, D011794, C005274	naringin, Catechin, Quercetin, naringenin, hesperetin
39367	Salvia rosmarinus	C23.888.592	Neurologic Manifestations	C013015, D002392, C040048, D012431, C005273, D011794, C018381	Catechin, salvin, Quercetin, caffeic acid, naringenin, hesperetin, Rutin
39367	Salvia rosmarinus	C23.888.821	Signs and Symptoms, Digestive	D011794	Quercetin
39367	Salvia rosmarinus	C25.100.562	Chemical and Drug Induced Liver Injury	C047368, C013015, D002392, C040048, D012431, C005273, D011794, C005274	3-methylquercetin, naringin, Catechin, Quercetin, caffeic acid, naringenin, hesperetin, Rutin
39367	Salvia rosmarinus	C25.723.260	Chemical and Drug Induced Liver Injury	C047368, C013015, D002392, C040048, D012431, C005273, D011794, C005274	3-methylquercetin, naringin, Catechin, Quercetin, caffeic acid, naringenin, hesperetin, Rutin
39367	Salvia rosmarinus	C25.723.705	Neurotoxicity Syndromes	D011794, C018381, D012431, C005274	salvin, Quercetin, naringin, Rutin
39367	Salvia rosmarinus	F03.615.250	Cognition Disorders	D011794	Quercetin
38869	Salvia sclarea	C04.557.465	Neoplasms, Germ Cell and Embryonal	C051414, D047310	hydroxygenkwanin, Apigenin
38869	Salvia sclarea	C04.557.580	Neoplasms, Nerve Tissue	C051414, D047310	hydroxygenkwanin, Apigenin
38869	Salvia sclarea	C04.557.665	Nevi and Melanomas	D047310	Apigenin
4182	Sesamum indicum	C04.588.180	Breast Neoplasms	D019301	Oleic Acid
4182	Sesamum indicum	C06.552.195	Chemical and Drug Induced Liver Injury	C025583, C054125	sesamol, sesamin
4182	Sesamum indicum	C06.552.241	Fatty Liver	C025583	sesamol
4182	Sesamum indicum	C10.228.140	Brain Diseases	D000376, C054125	Agmatine, sesamin
4182	Sesamum indicum	C10.228.662	Movement Disorders	C054125	sesamin
4182	Sesamum indicum	C10.597.350	Dyskinesias	C054125	sesamin
4182	Sesamum indicum	C10.597.617	Pain	D000376, D006139	Guaiacol, Agmatine
4182	Sesamum indicum	C17.800.090	Breast Diseases	D019301	Oleic Acid
4182	Sesamum indicum	C23.550.470	Inflammation	C025583, C054125	sesamol, sesamin
4182	Sesamum indicum	C23.888.277	Edema	C054125	sesamin
4182	Sesamum indicum	C23.888.592	Neurologic Manifestations	C054125, D000376, D006139	Guaiacol, Agmatine, sesamin
4182	Sesamum indicum	C25.100.562	Chemical and Drug Induced Liver Injury	C025583, C054125	sesamol, sesamin
4182	Sesamum indicum	C25.723.260	Chemical and Drug Induced Liver Injury	C025583, C054125	sesamol, sesamin
219868	Syzygium aromaticum	C01.252.400	Gram-Negative Bacterial Infections	D005054	Eugenol
219868	Syzygium aromaticum	C01.252.410	Gram-Positive Bacterial Infections	D005054	Eugenol
219868	Syzygium aromaticum	C04.557.465	Neoplasms, Germ Cell and Embryonal	C040015, C040048, D005707, D011794, D005054	Gallic Acid, Quercetin, caffeic acid, myricetin, Eugenol
219868	Syzygium aromaticum	C04.557.470	Neoplasms, Glandular and Epithelial	C040015, D009828, D011794, C018381, C006578	Oleanolic Acid, anethole, salvin, Quercetin, myricetin
219868	Syzygium aromaticum	C04.557.580	Neoplasms, Nerve Tissue	C040015, C040048, D005707, D011794, D005054	Gallic Acid, Quercetin, caffeic acid, myricetin, Eugenol
219868	Syzygium aromaticum	C04.557.665	Nevi and Melanomas	C040048, D005054, D005707	Gallic Acid, caffeic acid, Eugenol
219868	Syzygium aromaticum	C04.588.180	Breast Neoplasms	D011794, D002392, D005054, C006552	kaempferol, Quercetin, Eugenol, Catechin
219868	Syzygium aromaticum	C04.588.274	Digestive System Neoplasms	D011794, D002392, D005054	Quercetin, Eugenol, Catechin
219868	Syzygium aromaticum	C04.697.098	Carcinogenesis	C040015, D002392, C006552, D011794, D004610	Ellagic Acid, Catechin, kaempferol, Quercetin, myricetin
219868	Syzygium aromaticum	C05.116.198	Bone Diseases, Metabolic	D011794, C006552	Quercetin, kaempferol
219868	Syzygium aromaticum	C06.301.371	Gastrointestinal Neoplasms	D011794, D005054	Quercetin, Eugenol
219868	Syzygium aromaticum	C06.301.623	Liver Neoplasms	D011794, D002392	Quercetin, Catechin
219868	Syzygium aromaticum	C06.405.205	Gastroenteritis	D011794	Quercetin
219868	Syzygium aromaticum	C06.405.249	Gastrointestinal Neoplasms	D011794, D005054	Quercetin, Eugenol
219868	Syzygium aromaticum	C06.405.469	Intestinal Diseases	D011794, D005707, D005054, C006578	Quercetin, Gallic Acid, Eugenol, anethole
219868	Syzygium aromaticum	C06.405.748	Stomach Diseases	D011794, D005707, D005054, C006578	Gallic Acid, Quercetin, Eugenol, anethole
219868	Syzygium aromaticum	C06.552.195	Chemical and Drug Induced Liver Injury	D002392, C040048, D009828, D011794, D005054	Oleanolic Acid, Catechin, Quercetin, caffeic acid, Eugenol
219868	Syzygium aromaticum	C06.552.697	Liver Neoplasms	D011794, D002392	Quercetin, Catechin
219868	Syzygium aromaticum	C08.381.495	Lung Diseases, Obstructive	D011794	Quercetin
219868	Syzygium aromaticum	C08.381.742	Pulmonary Edema	D011794	Quercetin
219868	Syzygium aromaticum	C08.618.846	Respiratory Insufficiency	D011794	Quercetin
219868	Syzygium aromaticum	C10.228.140	Brain Diseases	D011794, C040048, D005054	Quercetin, caffeic acid, Eugenol
219868	Syzygium aromaticum	C10.228.662	Movement Disorders	D011794, C018381, D005054, D005707	salvin, Quercetin, Gallic Acid, Eugenol
219868	Syzygium aromaticum	C10.597.606	Neurobehavioral Manifestations	C040048, D011794, C018381, D020156, D004610	Ellagic Acid, Salicylic Acid, salvin, Quercetin, caffeic acid
219868	Syzygium aromaticum	C10.597.617	Pain	D011794, D005054, C073316	Quercetin, Eugenol, carvacrol
219868	Syzygium aromaticum	C12.294.644	Sexual Dysfunction, Physiological	D011794	Quercetin
219868	Syzygium aromaticum	C12.777.934	Urination Disorders	D011794, D004610	Quercetin, Ellagic Acid
219868	Syzygium aromaticum	C13.351.500	Genital Diseases, Female	D011794, D005054	Quercetin, Eugenol
219868	Syzygium aromaticum	C13.351.968	Urologic Diseases	C040015, D002392, D009828, D005707, D011794, D004610	Oleanolic Acid, Ellagic Acid, Catechin, Gallic Acid, Quercetin, myricetin
219868	Syzygium aromaticum	C14.907.137	Arterial Occlusive Diseases	D002392, C040048, C006552, D011794, D020156	Catechin, Salicylic Acid, kaempferol, Quercetin, caffeic acid
219868	Syzygium aromaticum	C14.907.355	Embolism and Thrombosis	C006578	anethole
219868	Syzygium aromaticum	C17.800.090	Breast Diseases	D011794, D002392, D005054, C006552	kaempferol, Quercetin, Eugenol, Catechin
219868	Syzygium aromaticum	C17.800.838	Skin Diseases, Infectious	D013943, D020156	Thymol, Salicylic Acid
219868	Syzygium aromaticum	C18.452.104	Bone Diseases, Metabolic	D011794, C006552	Quercetin, kaempferol
219868	Syzygium aromaticum	C18.452.394	Glucose Metabolism Disorders	D002392, D009828, C006552, D005707, D011794, D004610	Oleanolic Acid, Ellagic Acid, Catechin, Gallic Acid, kaempferol, Quercetin
219868	Syzygium aromaticum	C18.452.584	Lipid Metabolism Disorders	D011794, D009828, D005707	Quercetin, Oleanolic Acid, Gallic Acid
219868	Syzygium aromaticum	C18.654.726	Overnutrition	D011794, D009828	Oleanolic Acid, Quercetin
219868	Syzygium aromaticum	C23.550.414	Hemorrhage	D011794	Quercetin
219868	Syzygium aromaticum	C23.550.444	Hyperplasia	D011794, C018381, D004610	salvin, Quercetin, Ellagic Acid
219868	Syzygium aromaticum	C23.550.470	Inflammation	C041376, C040048, C073316, D009828, D011794, D005054, C006578	Oleanolic Acid, carvacrol, anethole, rosmarinic acid, Quercetin, caffeic acid, Eugenol
219868	Syzygium aromaticum	C23.550.513	Ischemia	D011794, D005707	Quercetin, Gallic Acid
219868	Syzygium aromaticum	C23.550.727	Neoplastic Processes	C040015, D002392, D009828, C006552, D005707, D011794, D005054, D004610, C006578	Oleanolic Acid, anethole, Ellagic Acid, Catechin, Quercetin, Gallic Acid, kaempferol, myricetin, Eugenol
219868	Syzygium aromaticum	C23.550.891	Ulcer	D013943	Thymol
219868	Syzygium aromaticum	C23.888.144	Body Weight	D011794, D002392, D009828	Oleanolic Acid, Quercetin, Catechin
219868	Syzygium aromaticum	C23.888.277	Edema	D011794, D013943, C040048, C007633	Thymol, Quercetin, caffeic acid, estragole
219868	Syzygium aromaticum	C23.888.592	Neurologic Manifestations	D002392, C040048, C073316, D005054, D011794, C018381, D020156, D004610, C006578	carvacrol, anethole, Ellagic Acid, Catechin, Salicylic Acid, salvin, Quercetin, caffeic acid, Eugenol
219868	Syzygium aromaticum	C23.888.821	Signs and Symptoms, Digestive	D011794	Quercetin
219868	Syzygium aromaticum	C23.888.852	Signs and Symptoms, Respiratory	D011794	Quercetin
219868	Syzygium aromaticum	C25.100.562	Chemical and Drug Induced Liver Injury	D002392, C040048, D009828, D011794, D005054	Oleanolic Acid, Catechin, Quercetin, caffeic acid, Eugenol
219868	Syzygium aromaticum	C25.723.260	Chemical and Drug Induced Liver Injury	D002392, C040048, D009828, D011794, D005054	Oleanolic Acid, Catechin, Quercetin, caffeic acid, Eugenol
50225	Taraxacum officinale	C04.557.337	Leukemia	D014975	Lutein
50225	Taraxacum officinale	C04.557.465	Neoplasms, Germ Cell and Embryonal	C040048, D002726, D047310, C004999	caffeic acid, ferulic acid, Chlorogenic Acid, Apigenin
50225	Taraxacum officinale	C04.557.580	Neoplasms, Nerve Tissue	C040048, D002726, C004999, D047310	caffeic acid, ferulic acid, Chlorogenic Acid, Apigenin
50225	Taraxacum officinale	C04.557.665	Nevi and Melanomas	C040048, D002726, C004999, D047310	caffeic acid, ferulic acid, Chlorogenic Acid, Apigenin
50225	Taraxacum officinale	C04.588.180	Breast Neoplasms	D019301, D047310	Oleic Acid, Apigenin
50225	Taraxacum officinale	C04.588.945	Urogenital Neoplasms	D047310	Apigenin
50225	Taraxacum officinale	C06.552.195	Chemical and Drug Induced Liver Injury	C040048, D002726, D014975	Lutein, caffeic acid, Chlorogenic Acid
50225	Taraxacum officinale	C12.777.419	Kidney Diseases	D047311	Luteolin
50225	Taraxacum officinale	C13.351.500	Genital Diseases, Female	D047311, D014975	Luteolin, Lutein
50225	Taraxacum officinale	C13.351.937	Urogenital Neoplasms	D047311	Luteolin
50225	Taraxacum officinale	C13.351.968	Urologic Diseases	D047311	Luteolin
50225	Taraxacum officinale	C14.907.137	Arterial Occlusive Diseases	C040048, C004999	caffeic acid, ferulic acid
50225	Taraxacum officinale	C17.800.090	Breast Diseases	D019301, D047310	Oleic Acid, Apigenin
50225	Taraxacum officinale	C18.452.394	Glucose Metabolism Disorders	C004999	ferulic acid
50225	Taraxacum officinale	C23.550.470	Inflammation	C036380, D047311, D047310, C004999, C040048	Apigenin, Luteolin, ferulic acid, caffeic acid, amyrin
50225	Taraxacum officinale	C23.888.144	Body Weight	D002726, D014975	Lutein, Chlorogenic Acid
50225	Taraxacum officinale	C23.888.277	Edema	C040048	caffeic acid
50225	Taraxacum officinale	C25.100.562	Chemical and Drug Induced Liver Injury	C040048, D002726, D014975	Lutein, caffeic acid, Chlorogenic Acid
50225	Taraxacum officinale	C25.723.260	Chemical and Drug Induced Liver Injury	C040048, D002726, D014975	Lutein, caffeic acid, Chlorogenic Acid
204219	Thymus serpyllum	C04.588.180	Breast Neoplasms	D047310	Apigenin
204219	Thymus serpyllum	C17.800.090	Breast Diseases	D047310	Apigenin
49992	Thymus vulgaris	C01.703.295	Dermatomycoses	D013943	Thymol
49992	Thymus vulgaris	C04.557.337	Leukemia	D011794, D012431, D005707	Quercetin, Gallic Acid, Rutin
49992	Thymus vulgaris	C04.588.274	Digestive System Neoplasms	D011794, C013015, C005466, D047310	ursolic acid, Quercetin, hesperetin, Apigenin
49992	Thymus vulgaris	C04.588.945	Urogenital Neoplasms	D011794, C005274, D047310	Quercetin, naringin, Apigenin
49992	Thymus vulgaris	C06.301.371	Gastrointestinal Neoplasms	D011794, C013015, D047310	Quercetin, hesperetin, Apigenin
49992	Thymus vulgaris	C06.405.205	Gastroenteritis	D011794, D012431	Quercetin, Rutin
49992	Thymus vulgaris	C06.405.249	Gastrointestinal Neoplasms	D011794, C013015, D047310	Quercetin, hesperetin, Apigenin
49992	Thymus vulgaris	C06.405.469	Intestinal Diseases	C013015, D047310, D012431, D005707, D011794	Apigenin, Gallic Acid, Quercetin, hesperetin, Rutin
49992	Thymus vulgaris	C06.552.195	Chemical and Drug Induced Liver Injury	C047368, C013015, C005466, C040048, D012431, D009828, C005273, D011794, C005274	ursolic acid, Oleanolic Acid, 3-methylquercetin, naringin, Quercetin, caffeic acid, naringenin, hesperetin, Rutin
49992	Thymus vulgaris	C08.381.495	Lung Diseases, Obstructive	D011794	Quercetin
49992	Thymus vulgaris	C08.381.677	Pneumonia	C005274	naringin
49992	Thymus vulgaris	C08.618.248	Cough	C005274	naringin
49992	Thymus vulgaris	C08.618.846	Respiratory Insufficiency	D011794	Quercetin
49992	Thymus vulgaris	C08.730.610	Pneumonia	C005274	naringin
49992	Thymus vulgaris	C12.294.260	Genital Neoplasms, Male	D011794, D047310	Quercetin, Apigenin
49992	Thymus vulgaris	C12.294.565	Prostatic Diseases	D011794, D047310	Quercetin, Apigenin
49992	Thymus vulgaris	C12.758.409	Genital Neoplasms, Male	D011794, D047310	Quercetin, Apigenin
49992	Thymus vulgaris	C14.907.489	Hypertension	D011794	Quercetin
49992	Thymus vulgaris	C17.800.174	Dermatitis	C005274	naringin
49992	Thymus vulgaris	C17.800.815	Skin Diseases, Eczematous	C005274	naringin
49992	Thymus vulgaris	C17.800.838	Skin Diseases, Infectious	D013943	Thymol
49992	Thymus vulgaris	C18.452.394	Glucose Metabolism Disorders	C005466, D012431, D009828, C005273, C006552, D005707, D011794, C005274	ursolic acid, Oleanolic Acid, naringin, Gallic Acid, kaempferol, Quercetin, naringenin, Rutin
49992	Thymus vulgaris	C18.452.584	Lipid Metabolism Disorders	C005466, D012431, D009828, C005273, D005707, D011794, C005274	Oleanolic Acid, naringin, Rutin, Gallic Acid, Quercetin, naringenin, ursolic acid
49992	Thymus vulgaris	C20.543.480	Hypersensitivity, Immediate	D011794, C005274	Quercetin, naringin
49992	Thymus vulgaris	C23.550.403	Hemolysis	D012431, D011794, C003377	Quercetin, taxifolin, Rutin
49992	Thymus vulgaris	C23.550.414	Hemorrhage	D011794	Quercetin
49992	Thymus vulgaris	C23.550.470	Inflammation	C047368, C041376, D047311, C005466, D047310, C040048, C073316, D009828, D011794, C005274	Oleanolic Acid, 3-methylquercetin, naringin, carvacrol, rosmarinic acid, Apigenin, Luteolin, Quercetin, caffeic acid, ursolic acid
49992	Thymus vulgaris	C23.550.891	Ulcer	D013943	Thymol
49992	Thymus vulgaris	C23.888.144	Body Weight	C013015, C005466, D009828, C005273, D011794, C005274	Oleanolic Acid, naringin, Quercetin, naringenin, hesperetin, ursolic acid
49992	Thymus vulgaris	C23.888.592	Neurologic Manifestations	C007210, C013015, C040048, D012431, C073316, C005273, D011794, C018381	carvacrol, Rutin, salvin, Quercetin, caffeic acid, naringenin, hesperetin, 4-cymene
49992	Thymus vulgaris	C23.888.821	Signs and Symptoms, Digestive	D011794	Quercetin
49992	Thymus vulgaris	C23.888.852	Signs and Symptoms, Respiratory	D011794, C005274	Quercetin, naringin
49992	Thymus vulgaris	C25.100.562	Chemical and Drug Induced Liver Injury	C047368, C013015, C005466, C040048, D012431, D009828, C005273, D011794, C005274	Oleanolic Acid, 3-methylquercetin, naringin, Rutin, Quercetin, caffeic acid, naringenin, hesperetin, ursolic acid
49992	Thymus vulgaris	C25.723.260	Chemical and Drug Induced Liver Injury	C013015, C047368, C005466, C040048, D012431, D009828, C005273, D011794, C005274	Oleanolic Acid, 3-methylquercetin, naringin, Rutin, Quercetin, caffeic acid, naringenin, hesperetin, ursolic acid
121718	Tilia tomentosa	C06.552.195	Chemical and Drug Induced Liver Injury	D011794, C040048, C005273	Quercetin, caffeic acid, naringenin
121718	Tilia tomentosa	C25.100.562	Chemical and Drug Induced Liver Injury	D011794, C040048, C005273	Quercetin, caffeic acid, naringenin
121718	Tilia tomentosa	C25.723.260	Chemical and Drug Induced Liver Injury	D011794, C040048, C005273	Quercetin, caffeic acid, naringenin
78534	Trigonella foenum-graecum	C04.588.180	Breast Neoplasms	D011794, C006552	Quercetin, kaempferol
78534	Trigonella foenum-graecum	C04.588.274	Digestive System Neoplasms	D011794	Quercetin
78534	Trigonella foenum-graecum	C04.588.322	Endocrine Gland Neoplasms	D011794, D047311	Luteolin, Quercetin
78534	Trigonella foenum-graecum	C04.588.945	Urogenital Neoplasms	D011794, C007768, D004610	formononetin, Quercetin, Ellagic Acid
78534	Trigonella foenum-graecum	C04.697.098	Carcinogenesis	D011794, C006552, D047311, D004610	Luteolin, Quercetin, Ellagic Acid, kaempferol
78534	Trigonella foenum-graecum	C05.550.114	Arthritis	D047311	Luteolin
78534	Trigonella foenum-graecum	C06.301.371	Gastrointestinal Neoplasms	D011794	Quercetin
78534	Trigonella foenum-graecum	C06.405.205	Gastroenteritis	D011794, D012431	Quercetin, Rutin
78534	Trigonella foenum-graecum	C06.405.249	Gastrointestinal Neoplasms	D011794	Quercetin
78534	Trigonella foenum-graecum	C06.405.469	Intestinal Diseases	D011794, D012431, D005707	Quercetin, Gallic Acid, Rutin
78534	Trigonella foenum-graecum	C06.552.195	Chemical and Drug Induced Liver Injury	C047368, C040048, D012431, C005273, D011794	3-methylquercetin, Quercetin, caffeic acid, naringenin, Rutin
78534	Trigonella foenum-graecum	C06.552.308	Hepatic Insufficiency	D013831	Thiamine
78534	Trigonella foenum-graecum	C08.381.495	Lung Diseases, Obstructive	D011794	Quercetin
78534	Trigonella foenum-graecum	C10.228.140	Brain Diseases	D011794, C040048, C005273, D013831	Thiamine, Quercetin, caffeic acid, naringenin
78534	Trigonella foenum-graecum	C10.228.662	Movement Disorders	D012431, D011794, D005707	Quercetin, Gallic Acid, Rutin
78534	Trigonella foenum-graecum	C10.597.606	Neurobehavioral Manifestations	D011794, C040048, C005273, D004610	Quercetin, caffeic acid, Ellagic Acid, naringenin
78534	Trigonella foenum-graecum	C10.668.491	Muscular Diseases	D011794, D013831	Quercetin, Thiamine
78534	Trigonella foenum-graecum	C11.510.245	Cataract	D047311, D013831	Luteolin, Thiamine
78534	Trigonella foenum-graecum	C12.294.260	Genital Neoplasms, Male	D011794	Quercetin
78534	Trigonella foenum-graecum	C12.758.409	Genital Neoplasms, Male	D011794	Quercetin
78534	Trigonella foenum-graecum	C12.777.419	Kidney Diseases	D047311, C007768, D012431, C005273, D005707, D011794, D004610	Ellagic Acid, Luteolin, Gallic Acid, formononetin, Quercetin, naringenin, Rutin
78534	Trigonella foenum-graecum	C13.351.968	Urologic Diseases	D047311, C007768, D012431, C005273, D005707, D011794, D004610	Ellagic Acid, Luteolin, Gallic Acid, formononetin, Quercetin, naringenin, Rutin
78534	Trigonella foenum-graecum	C14.280.647	Myocardial Ischemia	D011794, C040048, D004610, D005707	Quercetin, caffeic acid, Ellagic Acid, Gallic Acid
78534	Trigonella foenum-graecum	C14.907.137	Arterial Occlusive Diseases	D011794, C040048, C005273, C006552	Quercetin, caffeic acid, naringenin, kaempferol
78534	Trigonella foenum-graecum	C14.907.585	Myocardial Ischemia	D011794, C040048, D004610, D005707	Quercetin, caffeic acid, Ellagic Acid, Gallic Acid
78534	Trigonella foenum-graecum	C15.378.071	Anemia	D012431, D011794	Quercetin, Rutin
78534	Trigonella foenum-graecum	C17.800.090	Breast Diseases	D011794, C006552	Quercetin, kaempferol
78534	Trigonella foenum-graecum	C18.452.394	Glucose Metabolism Disorders	D012431, C005273, C006552, D005707, D011794, D004610	Ellagic Acid, Gallic Acid, kaempferol, Quercetin, naringenin, Rutin
78534	Trigonella foenum-graecum	C18.452.584	Lipid Metabolism Disorders	D012431, D011794, C005273, D005707	Quercetin, naringenin, Gallic Acid, Rutin
78534	Trigonella foenum-graecum	C18.654.726	Overnutrition	D011794, C005273	Quercetin, naringenin
78534	Trigonella foenum-graecum	C19.391.829	Testicular Diseases	D011794, D004610	Quercetin, Ellagic Acid
78534	Trigonella foenum-graecum	C20.543.480	Hypersensitivity, Immediate	D011794	Quercetin
78534	Trigonella foenum-graecum	C23.550.444	Hyperplasia	D011794, D004610	Quercetin, Ellagic Acid
78534	Trigonella foenum-graecum	C23.550.470	Inflammation	D011794, C047368, C040048, D047311	Quercetin, Luteolin, caffeic acid, 3-methylquercetin
78534	Trigonella foenum-graecum	C23.550.727	Neoplastic Processes	D047311, C005273, C006552, D005707, D011794, D004610	Ellagic Acid, Luteolin, Gallic Acid, kaempferol, Quercetin, naringenin
78534	Trigonella foenum-graecum	C23.888.144	Body Weight	D011794, C005273	Quercetin, naringenin
78534	Trigonella foenum-graecum	C23.888.277	Edema	D011794, C040048	Quercetin, caffeic acid
78534	Trigonella foenum-graecum	C23.888.592	Neurologic Manifestations	C040048, D012431, C005273, D011794, D004610, D013831	Thiamine, Ellagic Acid, Quercetin, caffeic acid, naringenin, Rutin
78534	Trigonella foenum-graecum	C25.100.562	Chemical and Drug Induced Liver Injury	C047368, C040048, D012431, C005273, D011794	3-methylquercetin, Quercetin, caffeic acid, naringenin, Rutin
78534	Trigonella foenum-graecum	C25.723.260	Chemical and Drug Induced Liver Injury	C047368, C040048, D012431, C005273, D011794	3-methylquercetin, Quercetin, caffeic acid, naringenin, Rutin
79772	Verbena officinalis	C23.550.470	Inflammation	C054132, C058956	acteoside, artemetin
354529	Zanthoxylum piperitum	C10.228.140	Brain Diseases	C054125	sesamin
354529	Zanthoxylum piperitum	C23.550.470	Inflammation	C054125	sesamin
94328	Zingiber officinale	C01.252.400	Gram-Negative Bacterial Infections	D005054	Eugenol
94328	Zingiber officinale	C01.252.410	Gram-Positive Bacterial Infections	D005054	Eugenol
94328	Zingiber officinale	C03.335.865	Trematode Infections	D011794	Quercetin
94328	Zingiber officinale	C04.557.465	Neoplasms, Germ Cell and Embryonal	D011794, C040048, D005054, D005707	Quercetin, caffeic acid, Gallic Acid, Eugenol
94328	Zingiber officinale	C04.557.470	Neoplasms, Glandular and Epithelial	D011794, C018381, C006578	salvin, Quercetin, anethole
94328	Zingiber officinale	C04.557.580	Neoplasms, Nerve Tissue	D011794, C040048, D005054, D005707	Quercetin, caffeic acid, Gallic Acid, Eugenol
94328	Zingiber officinale	C04.557.665	Nevi and Melanomas	C040048, D005054, D005707	caffeic acid, Gallic Acid, Eugenol
94328	Zingiber officinale	C04.588.180	Breast Neoplasms	D002392, C007845, C006552, D011794, D005054	Catechin, kaempferol, Quercetin, Eugenol, gingerol
94328	Zingiber officinale	C04.588.274	Digestive System Neoplasms	D002392, C008281, D005054, D011794, C007836	limonene, geraniol, Catechin, Quercetin, Eugenol
94328	Zingiber officinale	C04.588.322	Endocrine Gland Neoplasms	D011794	Quercetin
94328	Zingiber officinale	C04.588.443	Head and Neck Neoplasms	D011794, C018381	salvin, Quercetin
94328	Zingiber officinale	C04.588.805	Skin Neoplasms	D011794, D005054, C007845	Quercetin, Eugenol, gingerol
94328	Zingiber officinale	C04.588.894	Thoracic Neoplasms	D011794	Quercetin
94328	Zingiber officinale	C04.588.945	Urogenital Neoplasms	D011794, D005054	Quercetin, Eugenol
94328	Zingiber officinale	C04.697.098	Carcinogenesis	D011794, D002392, C006552	Quercetin, kaempferol, Catechin
94328	Zingiber officinale	C05.651.542	Myalgia	D011794	Quercetin
94328	Zingiber officinale	C06.301.371	Gastrointestinal Neoplasms	D011794, D005054, C007836	Quercetin, geraniol, Eugenol
94328	Zingiber officinale	C06.301.623	Liver Neoplasms	D011794, D002392, C008281	Quercetin, Catechin, limonene
94328	Zingiber officinale	C06.301.761	Pancreatic Neoplasms	D011794	Quercetin
94328	Zingiber officinale	C06.405.205	Gastroenteritis	D011794	Quercetin
94328	Zingiber officinale	C06.405.249	Gastrointestinal Neoplasms	D011794, D005054, C007836	Quercetin, geraniol, Eugenol
94328	Zingiber officinale	C06.405.469	Intestinal Diseases	C008281, D005707, D011794, D005054, C007836, C006578	limonene, anethole, geraniol, Gallic Acid, Quercetin, Eugenol
94328	Zingiber officinale	C06.405.748	Stomach Diseases	D005707, C008281, D011794, D005054, C006578	limonene, anethole, Gallic Acid, Quercetin, Eugenol
94328	Zingiber officinale	C06.552.195	Chemical and Drug Induced Liver Injury	D002392, C040048, C007078, C025473, D011794, D005054	gamma-sitosterol, Catechin, citronellol, Quercetin, caffeic acid, Eugenol
94328	Zingiber officinale	C06.552.241	Fatty Liver	D011794, D005707	Quercetin, Gallic Acid
94328	Zingiber officinale	C06.552.308	Hepatic Insufficiency	D002392	Catechin
94328	Zingiber officinale	C06.552.630	Liver Cirrhosis	D011794	Quercetin
94328	Zingiber officinale	C06.552.697	Liver Neoplasms	D011794, D002392, C008281	Quercetin, Catechin, limonene
94328	Zingiber officinale	C06.689.667	Pancreatic Neoplasms	D011794	Quercetin
94328	Zingiber officinale	C06.689.750	Pancreatitis	D011794	Quercetin
94328	Zingiber officinale	C07.465.565	Mouth Neoplasms	D011794, C018381	salvin, Quercetin
94328	Zingiber officinale	C08.381.495	Lung Diseases, Obstructive	D011794	Quercetin
94328	Zingiber officinale	C08.381.540	Lung Neoplasms	D011794	Quercetin
94328	Zingiber officinale	C08.618.248	Cough	D002164	Camphor
94328	Zingiber officinale	C08.618.846	Respiratory Insufficiency	D011794	Quercetin
94328	Zingiber officinale	C08.785.520	Lung Neoplasms	D011794	Quercetin
94328	Zingiber officinale	C10.228.140	Brain Diseases	C040048, C007078, D005054, D011794, C007836	geraniol, citronellol, Quercetin, caffeic acid, Eugenol
94328	Zingiber officinale	C10.228.662	Movement Disorders	D011794, C018381, D005054, D005707	Gallic Acid, salvin, Quercetin, Eugenol
94328	Zingiber officinale	C10.574.812	Parkinson Disease	D005054	Eugenol
94328	Zingiber officinale	C10.597.350	Dyskinesias	D011794, C018381, C007836	salvin, Quercetin, geraniol
94328	Zingiber officinale	C10.597.606	Neurobehavioral Manifestations	C040048, C008281, D011794, C018381, C007836	limonene, geraniol, salvin, Quercetin, caffeic acid
94328	Zingiber officinale	C10.597.613	Neuromuscular Manifestations	D005054	Eugenol
94328	Zingiber officinale	C10.597.617	Pain	C007210, C019286, C073316, D011794, D005054	carvacrol, Quercetin, Eugenol, camphene, 4-cymene
94328	Zingiber officinale	C10.597.622	Paralysis	C006578	anethole
94328	Zingiber officinale	C10.597.751	Sensation Disorders	D002392, C007078, C073316, D011794, D005054	carvacrol, Catechin, citronellol, Quercetin, Eugenol
94328	Zingiber officinale	C10.668.491	Muscular Diseases	D011794	Quercetin
94328	Zingiber officinale	C10.720.475	Heavy Metal Poisoning, Nervous System	D011794	Quercetin
94328	Zingiber officinale	C12.294.260	Genital Neoplasms, Male	D011794	Quercetin
94328	Zingiber officinale	C12.294.565	Prostatic Diseases	D011794	Quercetin
94328	Zingiber officinale	C12.758.409	Genital Neoplasms, Male	D011794	Quercetin
94328	Zingiber officinale	C12.758.820	Urologic Neoplasms	D011794	Quercetin
94328	Zingiber officinale	C12.777.419	Kidney Diseases	D011794, D005707	Quercetin, Gallic Acid
94328	Zingiber officinale	C12.777.829	Urinary Bladder Diseases	D011794, D002392	Quercetin, Catechin
94328	Zingiber officinale	C12.777.934	Urination Disorders	D011794	Quercetin
94328	Zingiber officinale	C13.351.500	Genital Diseases, Female	D011794, D005054	Quercetin, Eugenol
94328	Zingiber officinale	C13.351.937	Urogenital Neoplasms	D011794, D005054	Quercetin, Eugenol
94328	Zingiber officinale	C13.351.968	Urologic Diseases	D011794, D002392, D005707	Quercetin, Gallic Acid, Catechin
94328	Zingiber officinale	C14.280.238	Cardiomyopathies	D011794, C041376, C006552	Quercetin, kaempferol, rosmarinic acid
94328	Zingiber officinale	C14.280.647	Myocardial Ischemia	C041376, D002392, C040048, D005707, D011794	rosmarinic acid, Catechin, Gallic Acid, Quercetin, caffeic acid
94328	Zingiber officinale	C14.907.137	Arterial Occlusive Diseases	D011794, D002392, C040048, C006552	Quercetin, caffeic acid, kaempferol, Catechin
94328	Zingiber officinale	C14.907.253	Cerebrovascular Disorders	D011794	Quercetin
94328	Zingiber officinale	C14.907.355	Embolism and Thrombosis	C006578	anethole
94328	Zingiber officinale	C14.907.489	Hypertension	D011794	Quercetin
94328	Zingiber officinale	C14.907.585	Myocardial Ischemia	C041376, D002392, C040048, D005707, D011794	Catechin, rosmarinic acid, Gallic Acid, Quercetin, caffeic acid
94328	Zingiber officinale	C14.907.725	Reperfusion Injury	D011794, C041376, D005707	Quercetin, Gallic Acid, rosmarinic acid
94328	Zingiber officinale	C15.378.071	Anemia	D011794	Quercetin
94328	Zingiber officinale	C15.378.553	Leukocyte Disorders	C073316	carvacrol
94328	Zingiber officinale	C15.604.515	Lymphoproliferative Disorders	D011794	Quercetin
94328	Zingiber officinale	C16.131.666	Nervous System Malformations	D011794	Quercetin
94328	Zingiber officinale	C16.320.565	Metabolism, Inborn Errors	D002392	Catechin
94328	Zingiber officinale	C16.320.700	Neoplastic Syndromes, Hereditary	D011794	Quercetin
94328	Zingiber officinale	C17.800.090	Breast Diseases	D002392, C007845, C006552, D011794, D005054	Catechin, kaempferol, Quercetin, Eugenol, gingerol
94328	Zingiber officinale	C17.800.862	Skin Diseases, Vascular	D005054	Eugenol
94328	Zingiber officinale	C17.800.882	Skin Neoplasms	D011794, D005054, C007845	Quercetin, Eugenol, gingerol
94328	Zingiber officinale	C18.452.394	Glucose Metabolism Disorders	D002392, C007845, C006552, D005707, D011794	Catechin, Gallic Acid, kaempferol, Quercetin, gingerol
94328	Zingiber officinale	C18.452.584	Lipid Metabolism Disorders	D011794, C025473, C018584, D005707	Quercetin, linalool, Gallic Acid, gamma-sitosterol
94328	Zingiber officinale	C18.452.648	Metabolism, Inborn Errors	D002392	Catechin
94328	Zingiber officinale	C18.654.726	Overnutrition	D011794	Quercetin
94328	Zingiber officinale	C19.344.410	Ovarian Neoplasms	D011794	Quercetin
94328	Zingiber officinale	C19.344.421	Pancreatic Neoplasms	D011794	Quercetin
94328	Zingiber officinale	C19.391.630	Ovarian Diseases	D011794	Quercetin
94328	Zingiber officinale	C20.543.480	Hypersensitivity, Immediate	D011794, D005054	Quercetin, Eugenol
94328	Zingiber officinale	C23.300.823	Plaque, Atherosclerotic	D011794	Quercetin
94328	Zingiber officinale	C23.550.161	Cardiotoxicity	D011794	Quercetin
94328	Zingiber officinale	C23.550.355	Fibrosis	D011794, D005707	Quercetin, Gallic Acid
94328	Zingiber officinale	C23.550.414	Hemorrhage	D011794	Quercetin
94328	Zingiber officinale	C23.550.444	Hyperplasia	D011794, C018381	salvin, Quercetin
94328	Zingiber officinale	C23.550.470	Inflammation	C041376, C040048, C073316, D011794, D005054, C006578	carvacrol, anethole, rosmarinic acid, Quercetin, caffeic acid, Eugenol
94328	Zingiber officinale	C23.550.513	Ischemia	D011794, D005707	Quercetin, Gallic Acid
94328	Zingiber officinale	C23.550.727	Neoplastic Processes	D002392, C040115, C006552, D005707, D011794, D005054, C006578	shogaol, anethole, Catechin, kaempferol, Gallic Acid, Quercetin, Eugenol
94328	Zingiber officinale	C23.550.737	Nerve Degeneration	D011794, D002392, C040048, D005054	Quercetin, caffeic acid, Eugenol, Catechin
94328	Zingiber officinale	C23.550.767	Postoperative Complications	D011794, C041376, D005054, D005707	Gallic Acid, Quercetin, Eugenol, rosmarinic acid
94328	Zingiber officinale	C23.550.891	Ulcer	D013943	Thymol
94328	Zingiber officinale	C23.888.144	Body Weight	D011794, D002392, C007078, C007845	Quercetin, Catechin, gingerol, citronellol
94328	Zingiber officinale	C23.888.277	Edema	D002164, C040048, C007633, C007078, D011794, D013943	Camphor, Thymol, citronellol, Quercetin, caffeic acid, estragole
94328	Zingiber officinale	C23.888.592	Neurologic Manifestations	C007210, D002392, C040048, C019286, C007078, C073316, C007836, C008281, D011794, C018381, D005054, C006578	limonene, carvacrol, anethole, geraniol, Catechin, citronellol, salvin, Quercetin, caffeic acid, Eugenol, camphene, 4-cymene
94328	Zingiber officinale	C23.888.821	Signs and Symptoms, Digestive	D011794	Quercetin
94328	Zingiber officinale	C23.888.852	Signs and Symptoms, Respiratory	D011794, D002164	Camphor, Quercetin
94328	Zingiber officinale	C23.888.942	Urological Manifestations	D011794	Quercetin
94328	Zingiber officinale	C25.100.389	Cardiotoxicity	D011794	Quercetin
94328	Zingiber officinale	C25.100.562	Chemical and Drug Induced Liver Injury	D002392, C040048, C007078, C025473, D011794, D005054	gamma-sitosterol, Catechin, citronellol, Quercetin, caffeic acid, Eugenol
94328	Zingiber officinale	C25.723.260	Chemical and Drug Induced Liver Injury	D002392, C040048, C007078, C025473, D011794, D005054	gamma-sitosterol, Catechin, citronellol, Quercetin, caffeic acid, Eugenol
94328	Zingiber officinale	C25.723.705	Neurotoxicity Syndromes	D011794, C018381	salvin, Quercetin
94328	Zingiber officinale	C26.733.266	Cardiotoxicity	D011794	Quercetin
94328	Zingiber officinale	F03.615.250	Cognition Disorders	D011794	Quercetin
